# Supplementary material
Source: ML conference proceedings conference paper supplement (https://openreview.net/forum?id=zXN-mfuX7n)

# PPCA [KNOWN VAR]

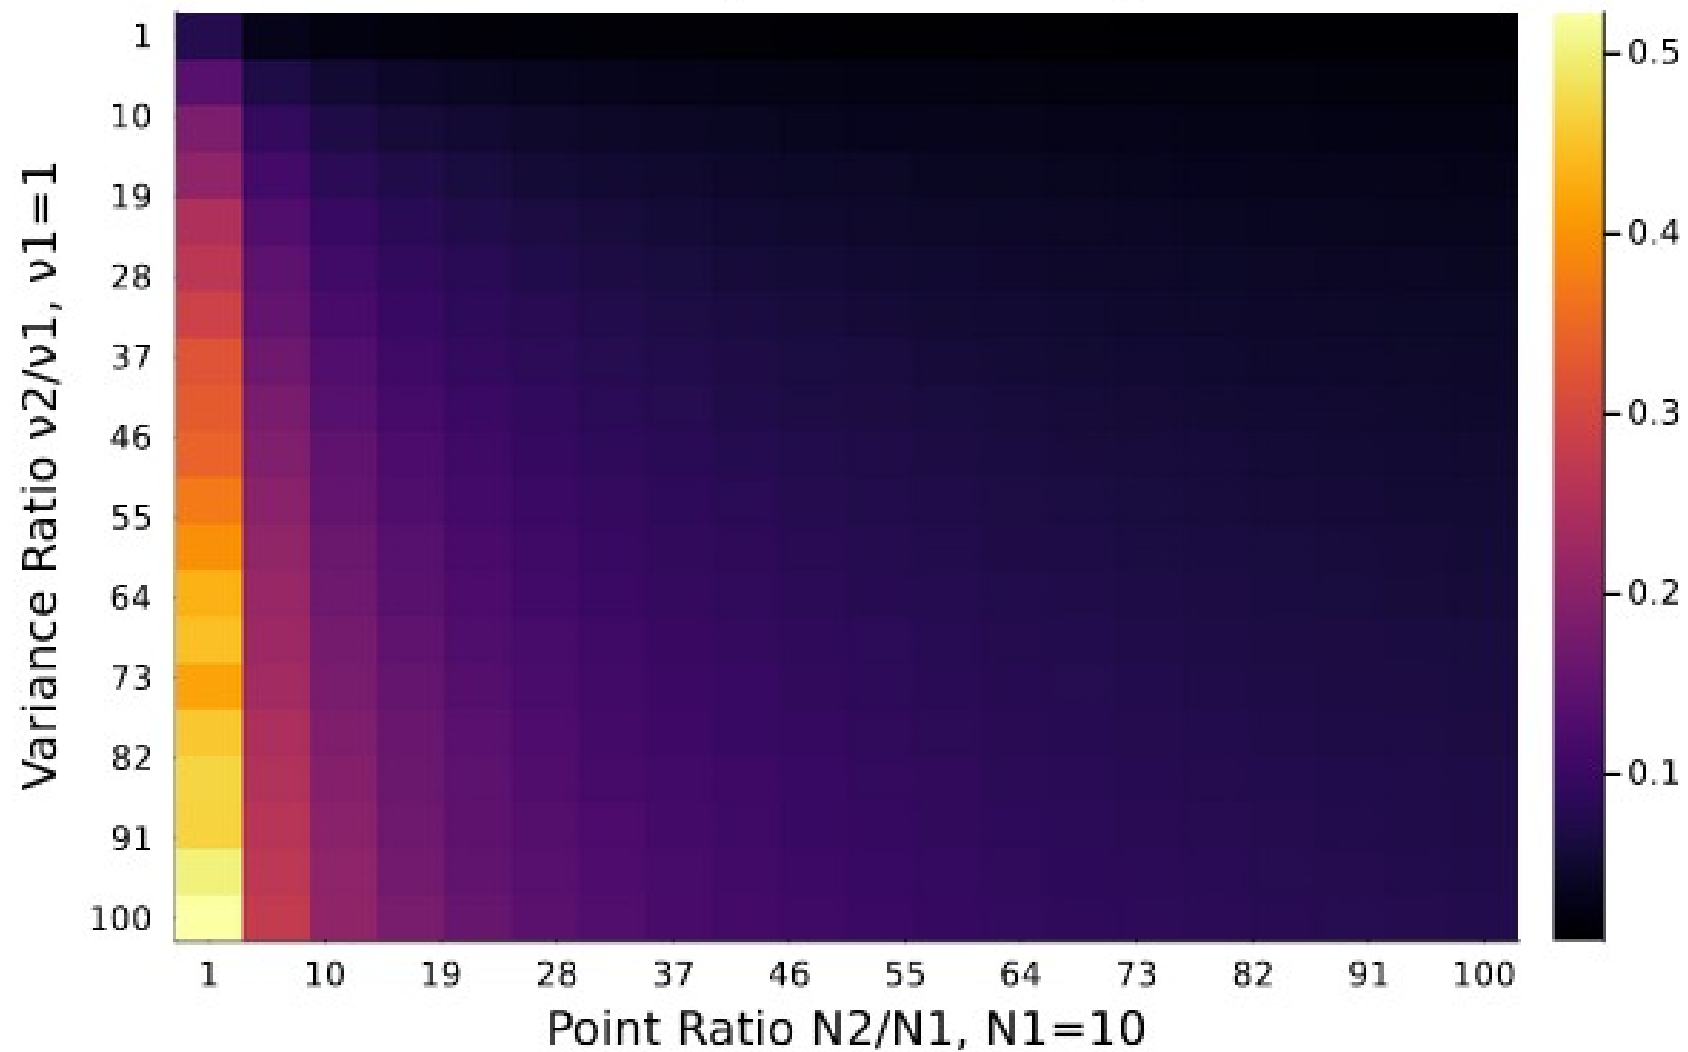

## HPCA [KNOWN VAR]

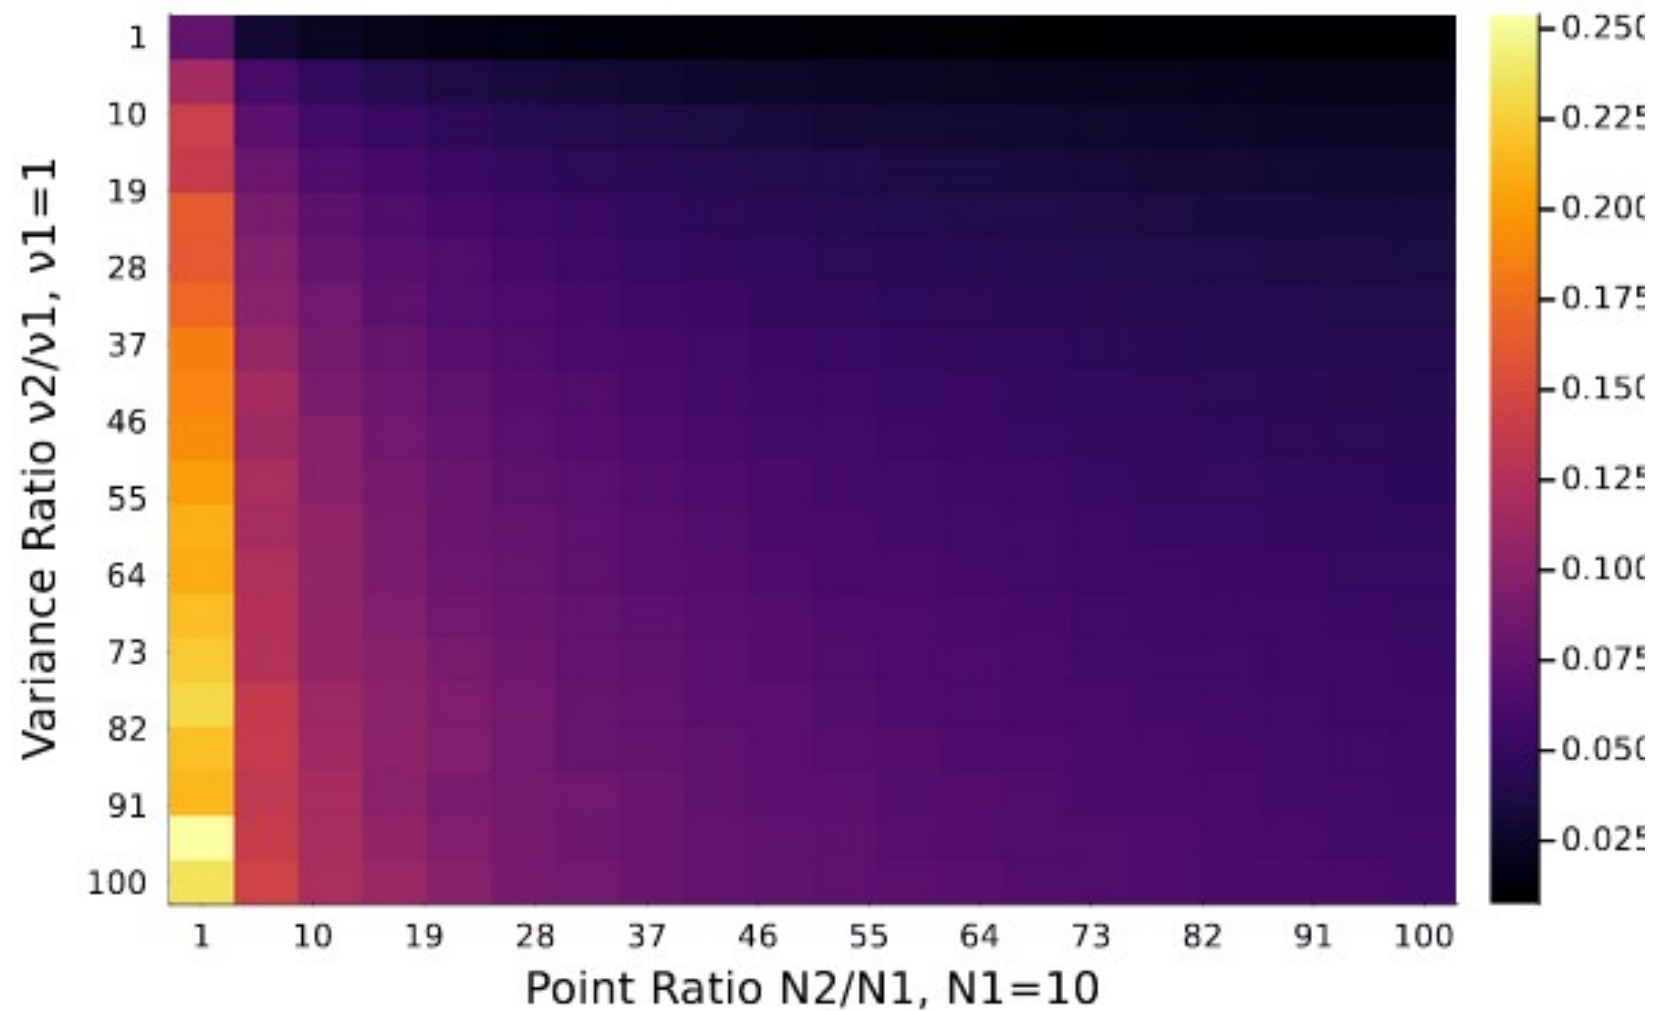

HPCA/PCA-GOOD [KNOWN VAR]

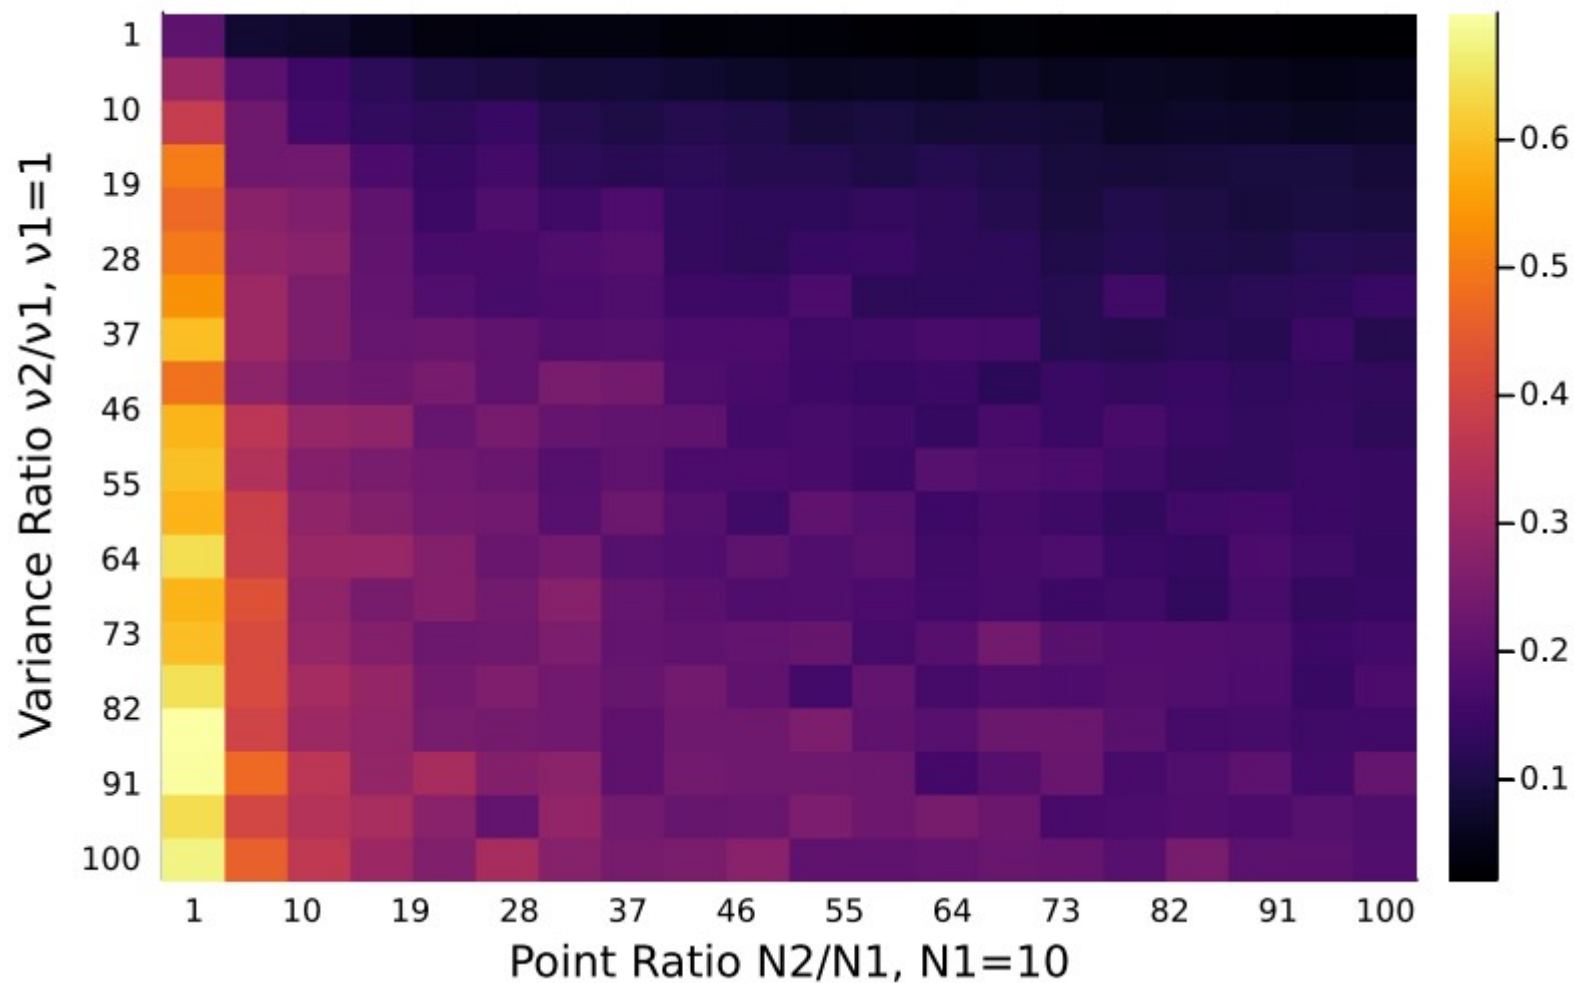

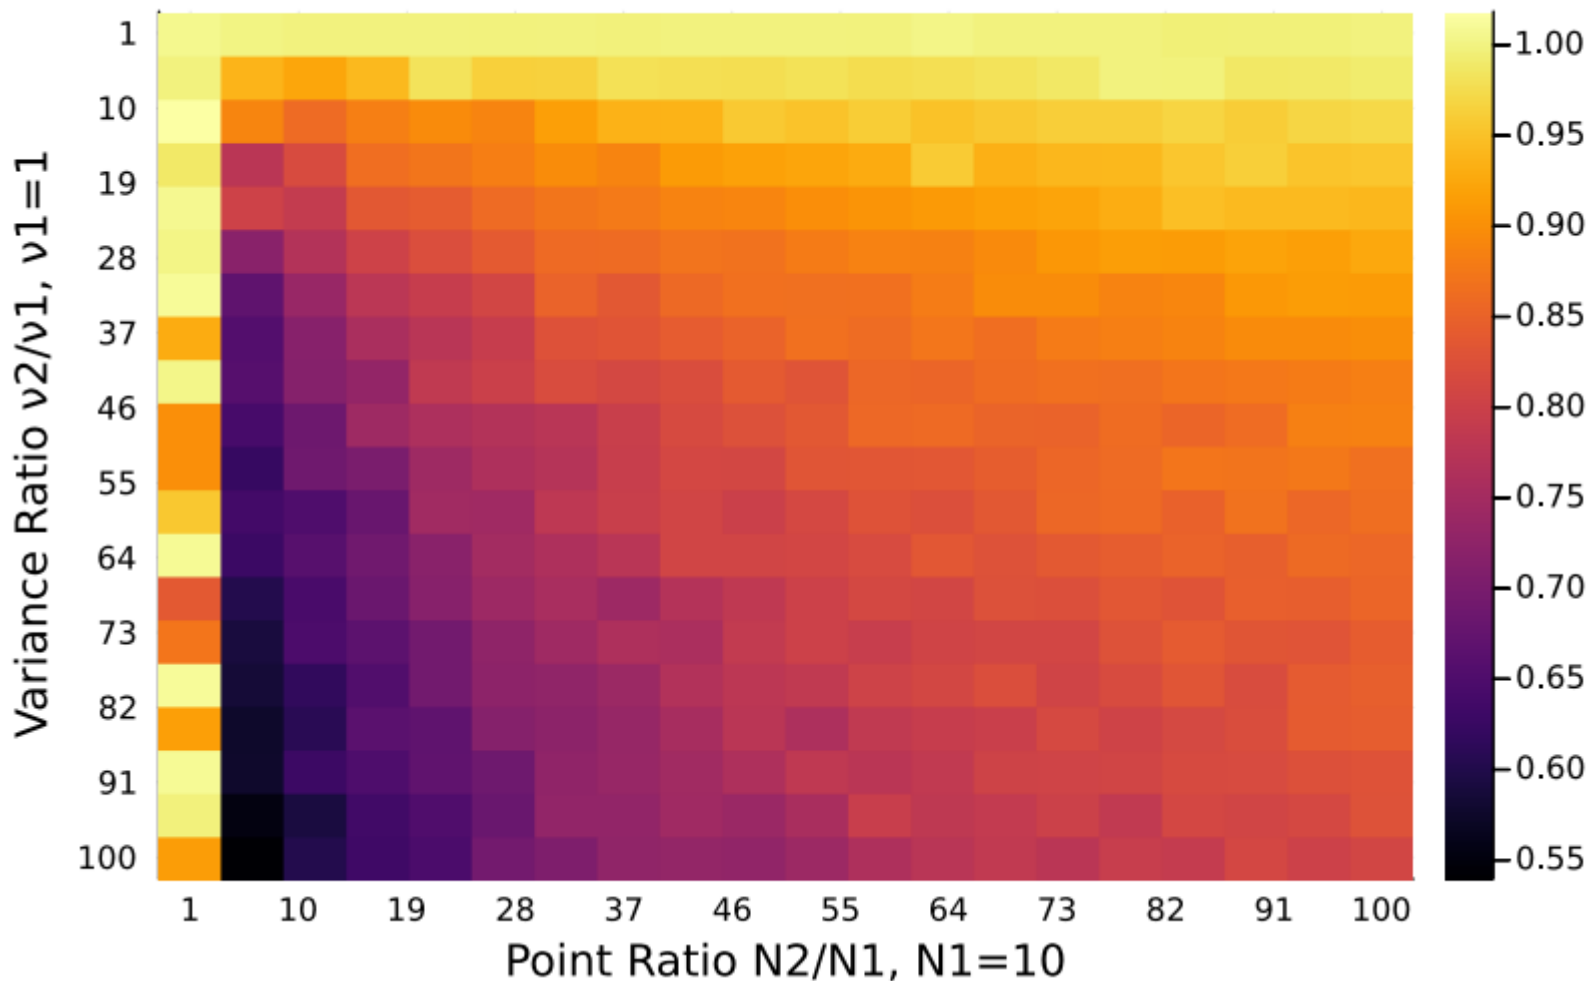

# HPCA/HEPPCAT [UNKNOWN VAR, NO GROUPS]

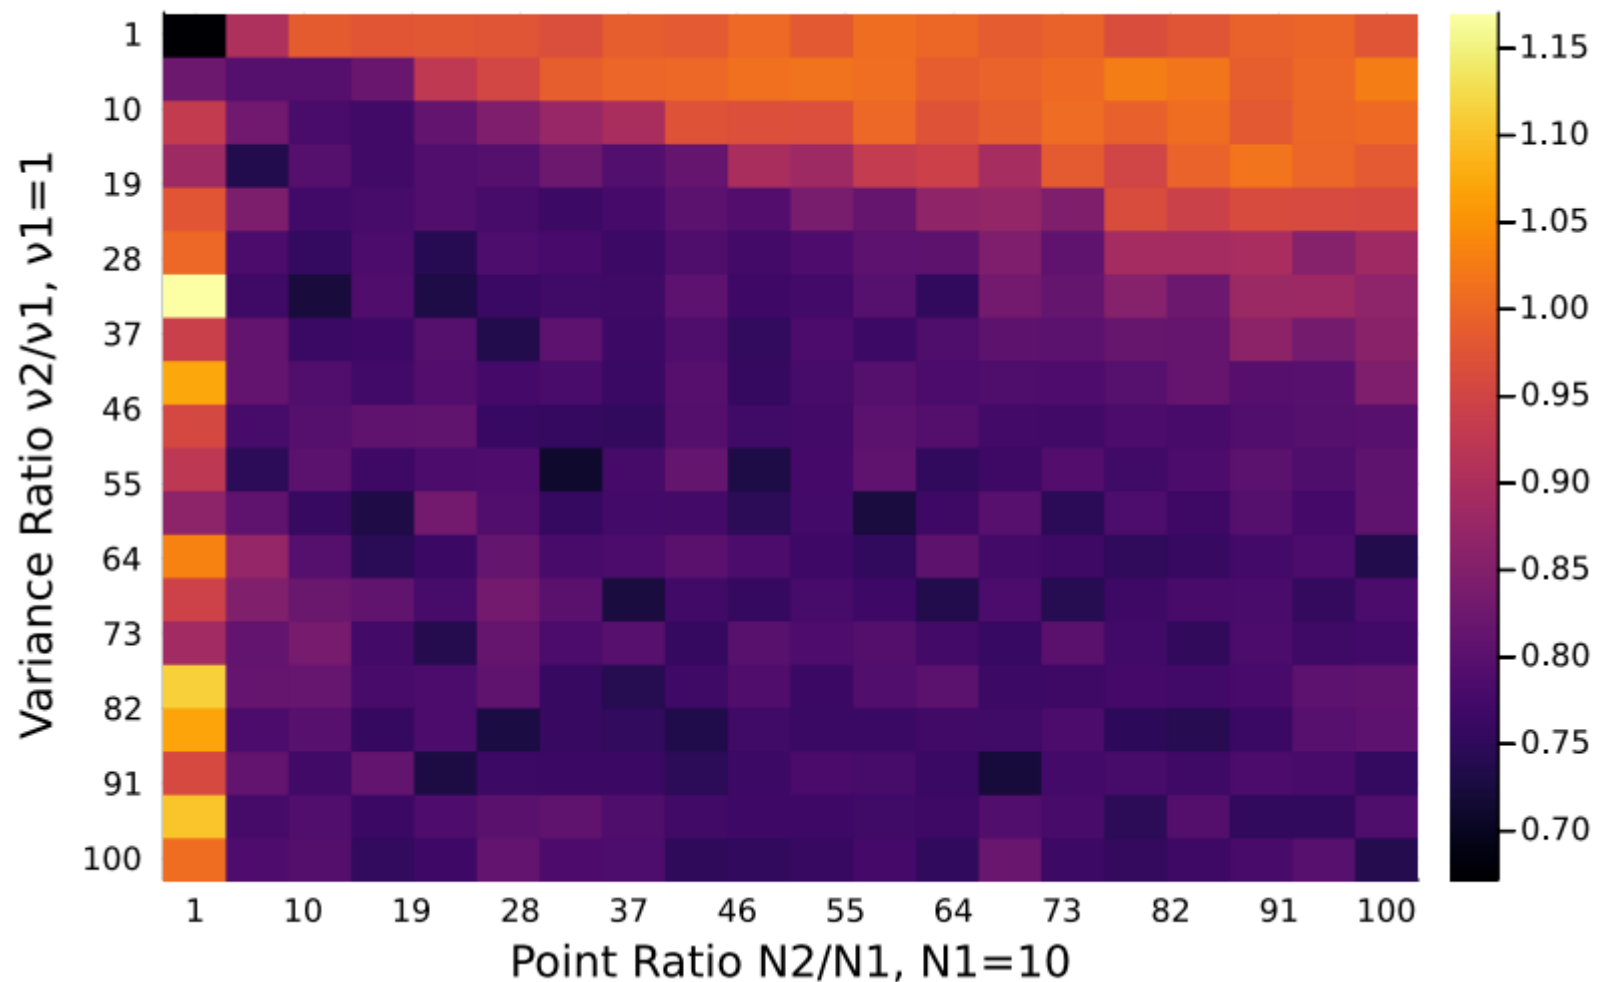

# HPCA [UNKNOWN VAR, NO GROUPS]

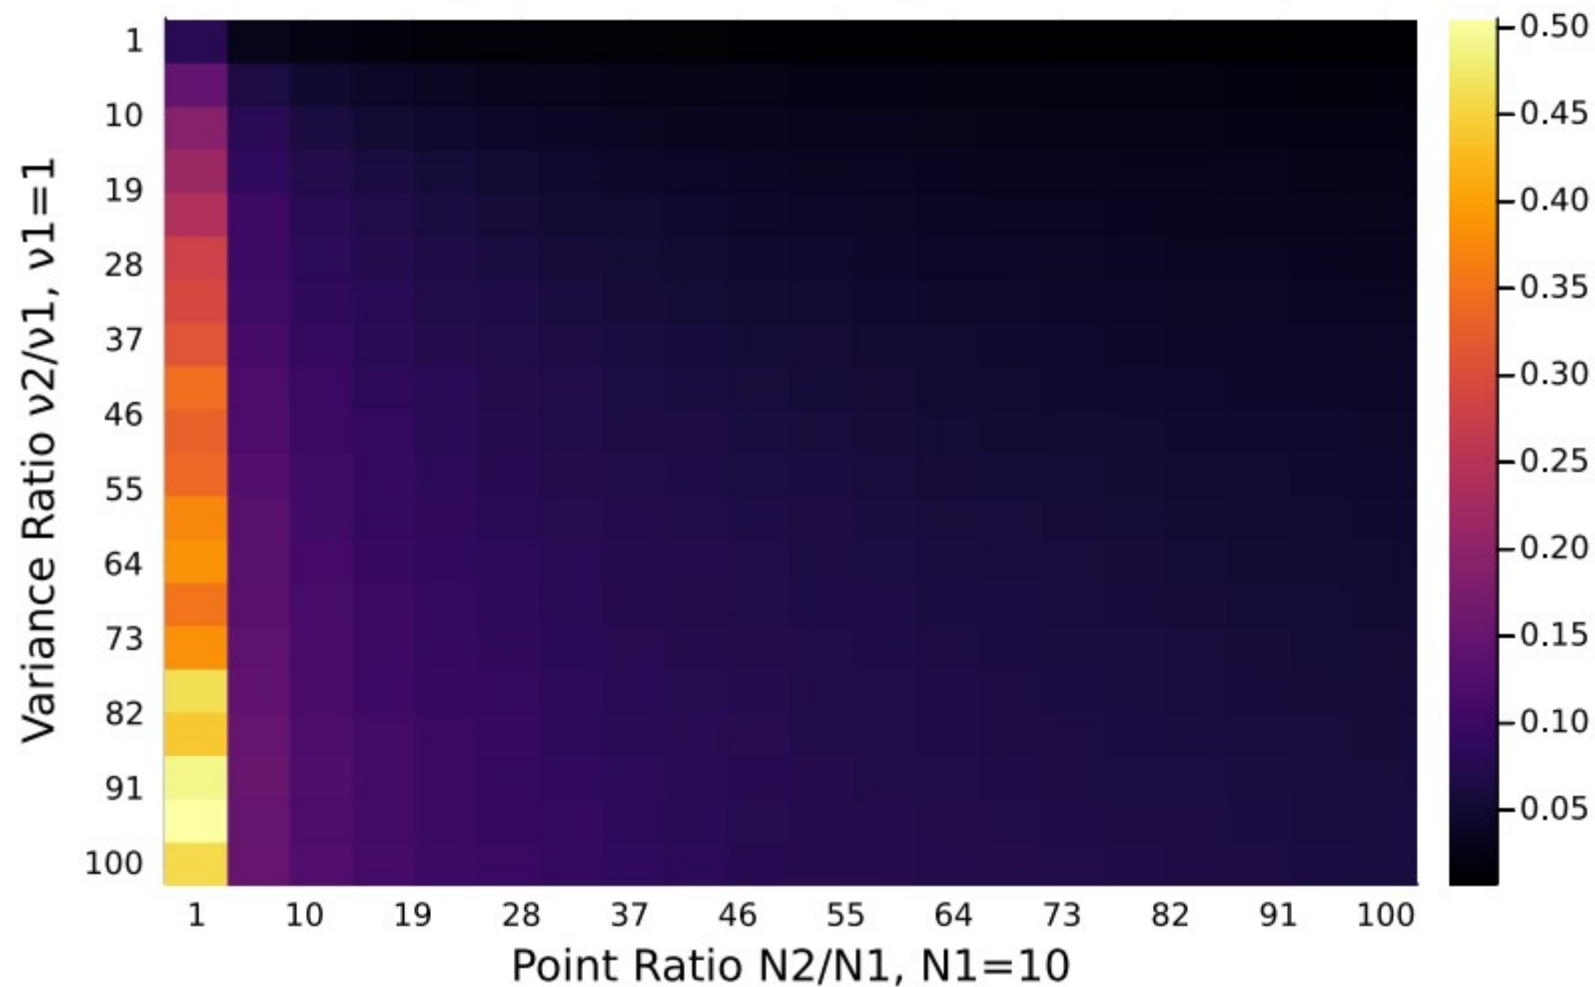

# HEPPCAT [UNKNOWN VAR, NO GROUPS]

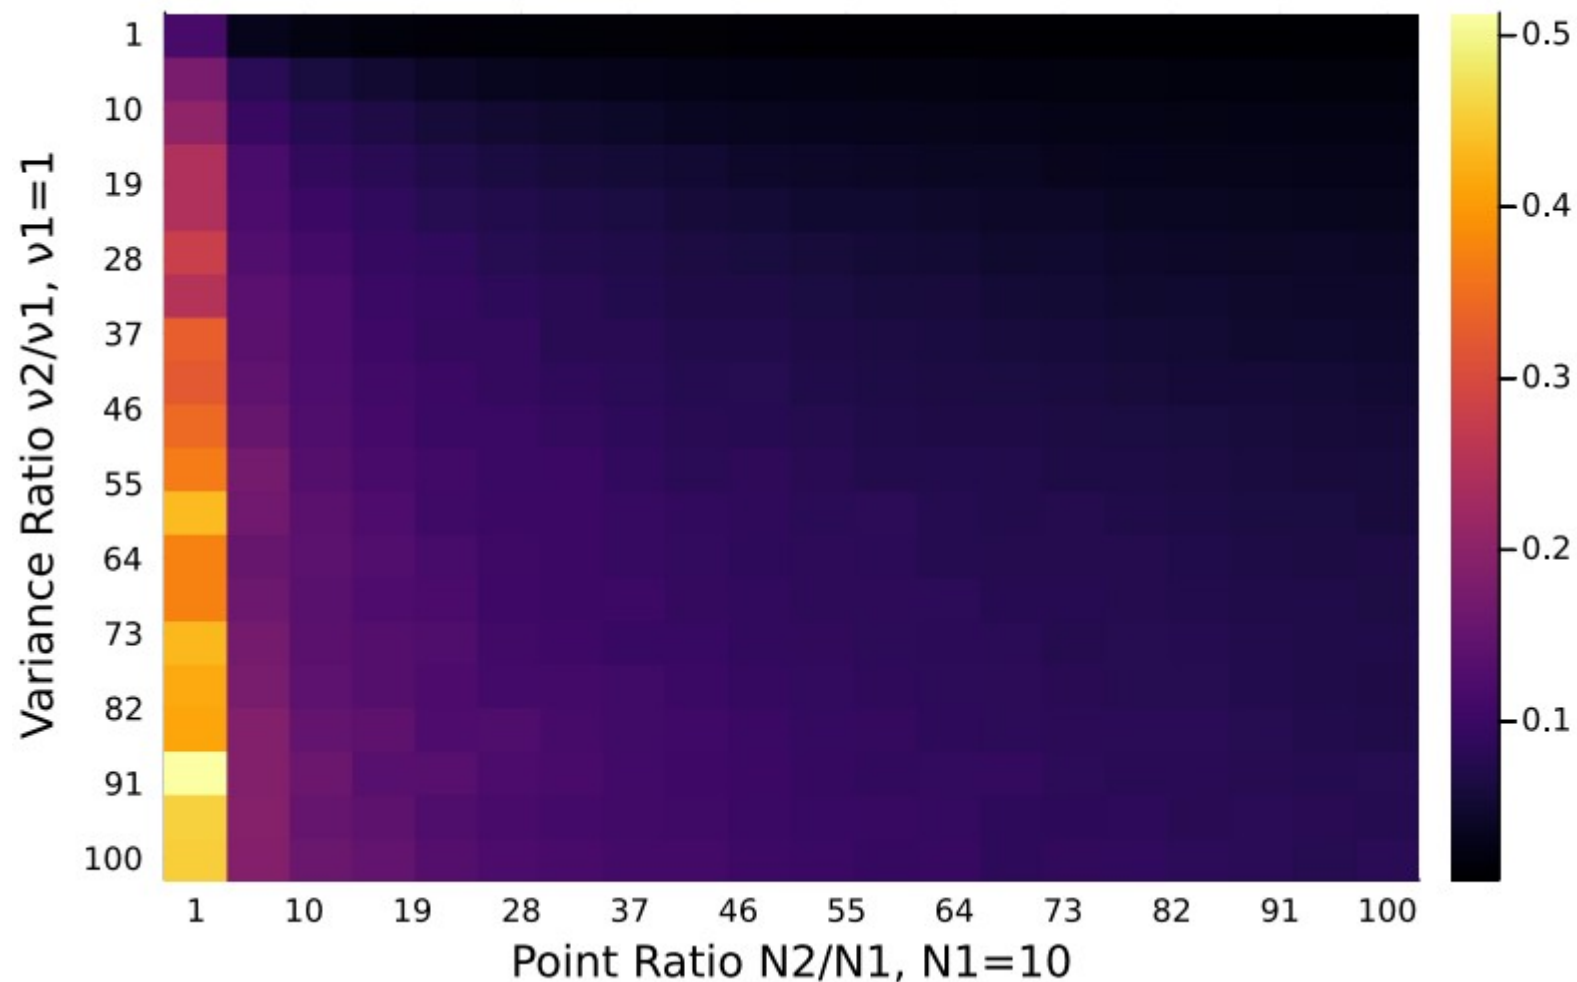



## HPCA CROSS VALIDATION MATRIX

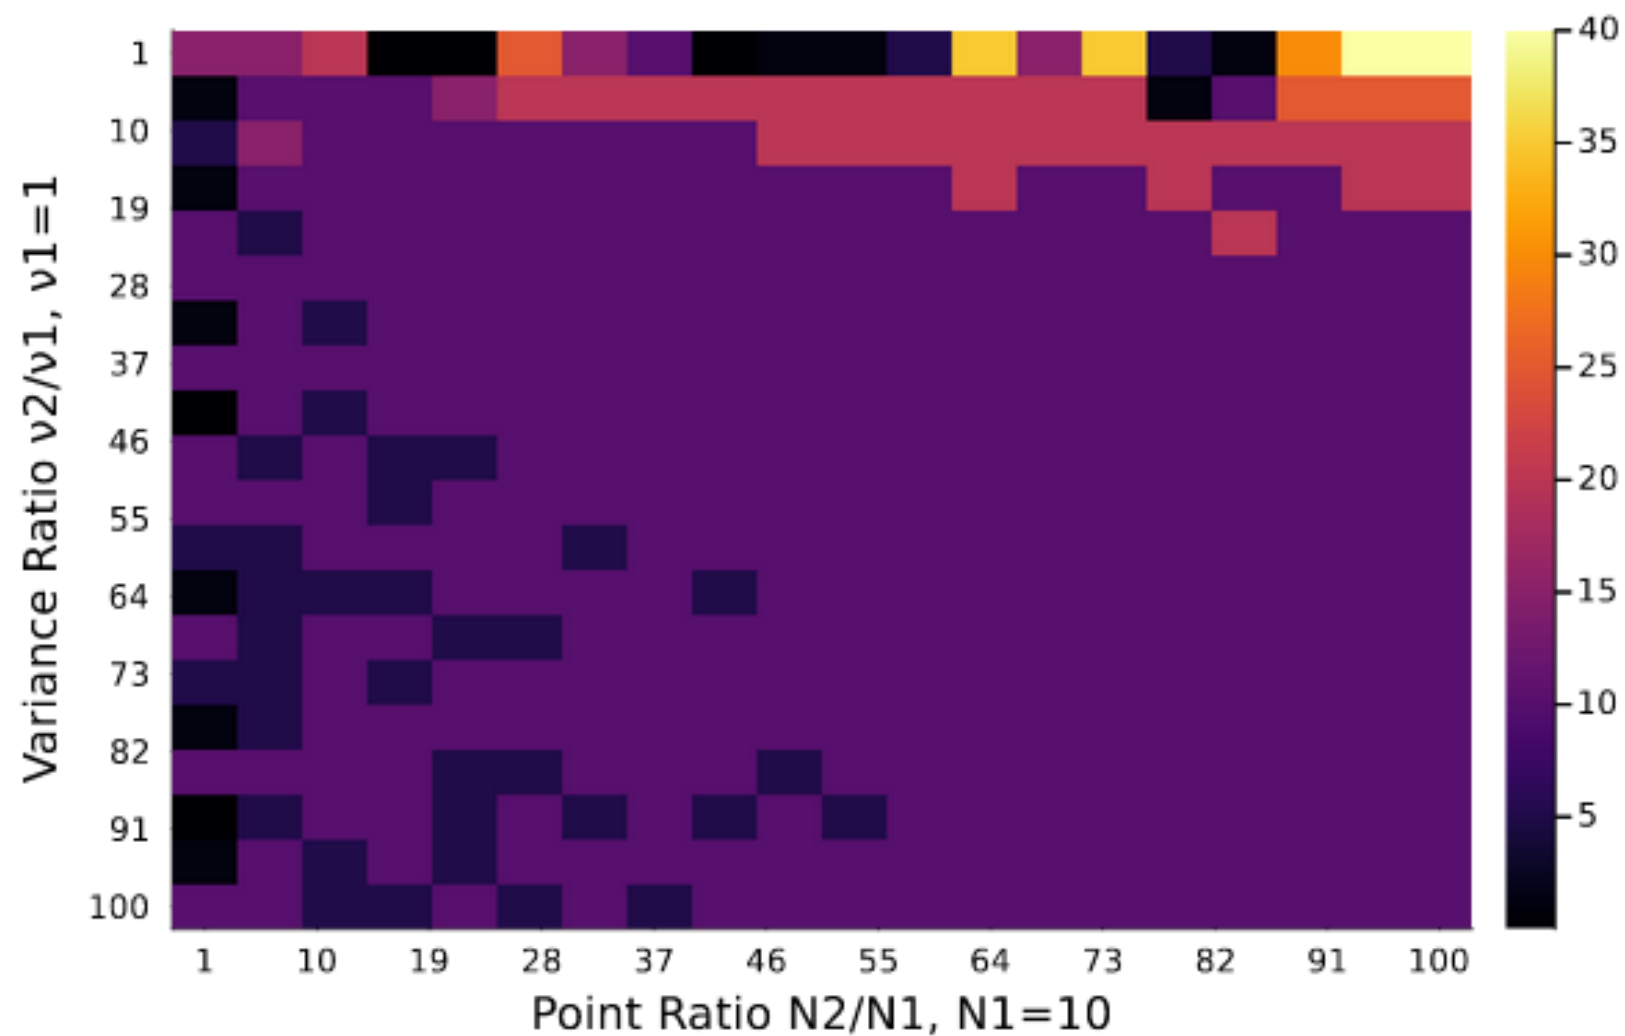

Supplement: supplementary_material [file attachment]
