# Supplementary material
Source: ML conference proceedings conference paper supplement (https://openreview.net/forum?id=zXN-mfuX7n)

# HPCA (v unknown, groups, good points = rank)

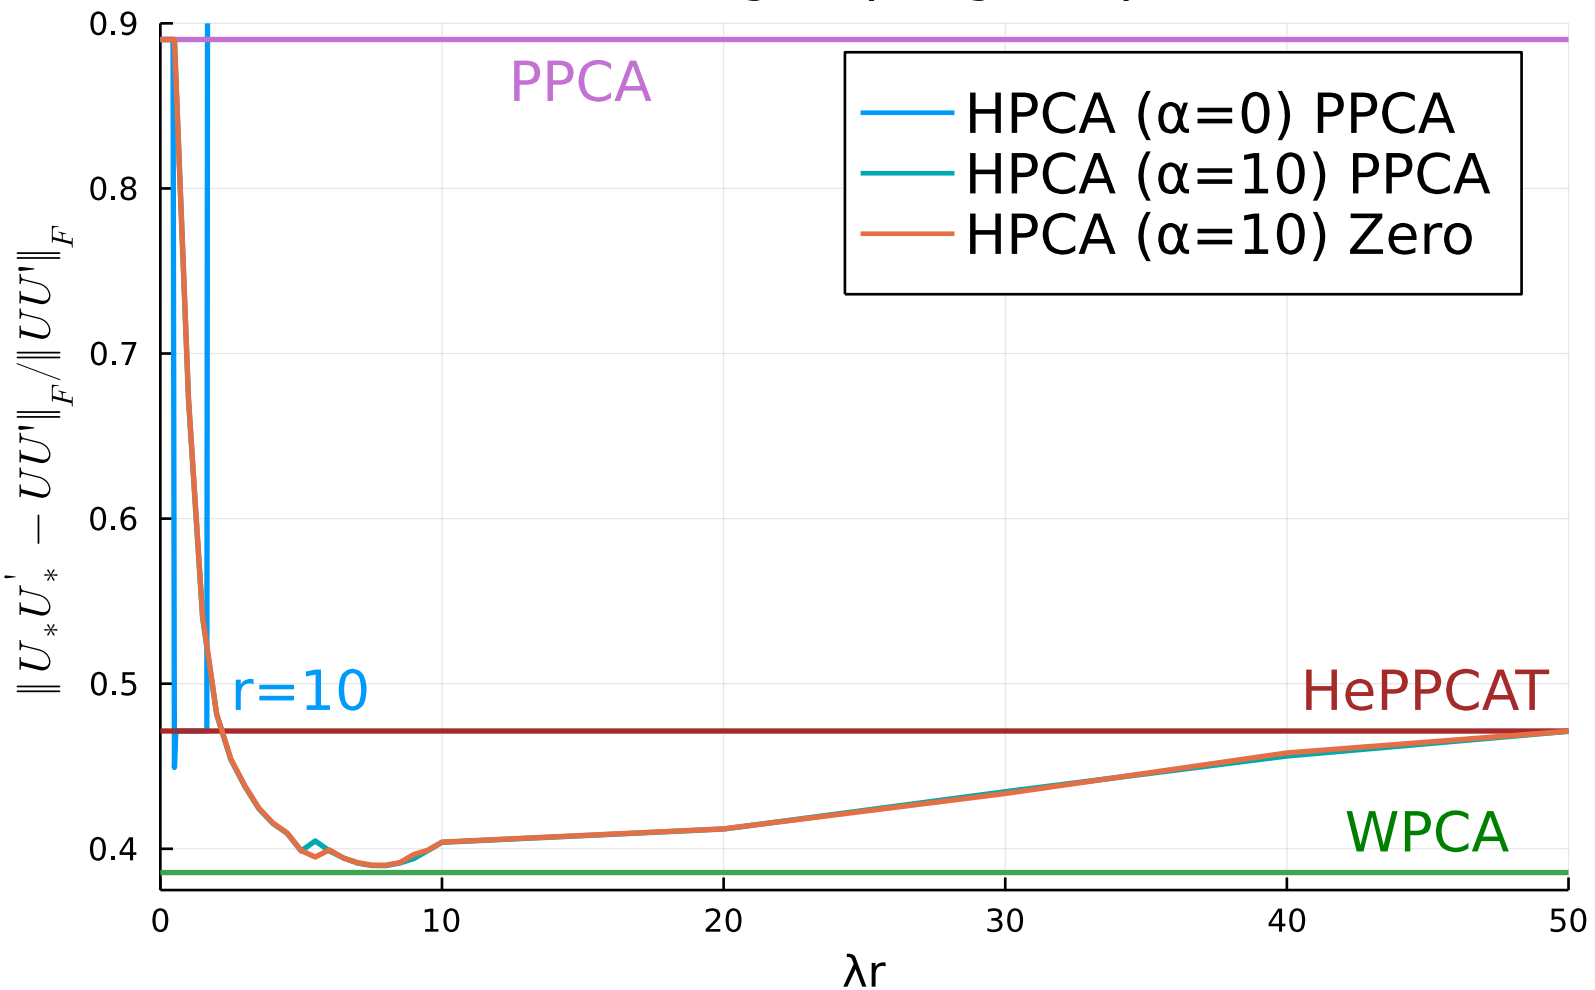

Supplement: supplementary_material [file attachment]

# HPCA Init Effects ( $v$ known, good points = rank)

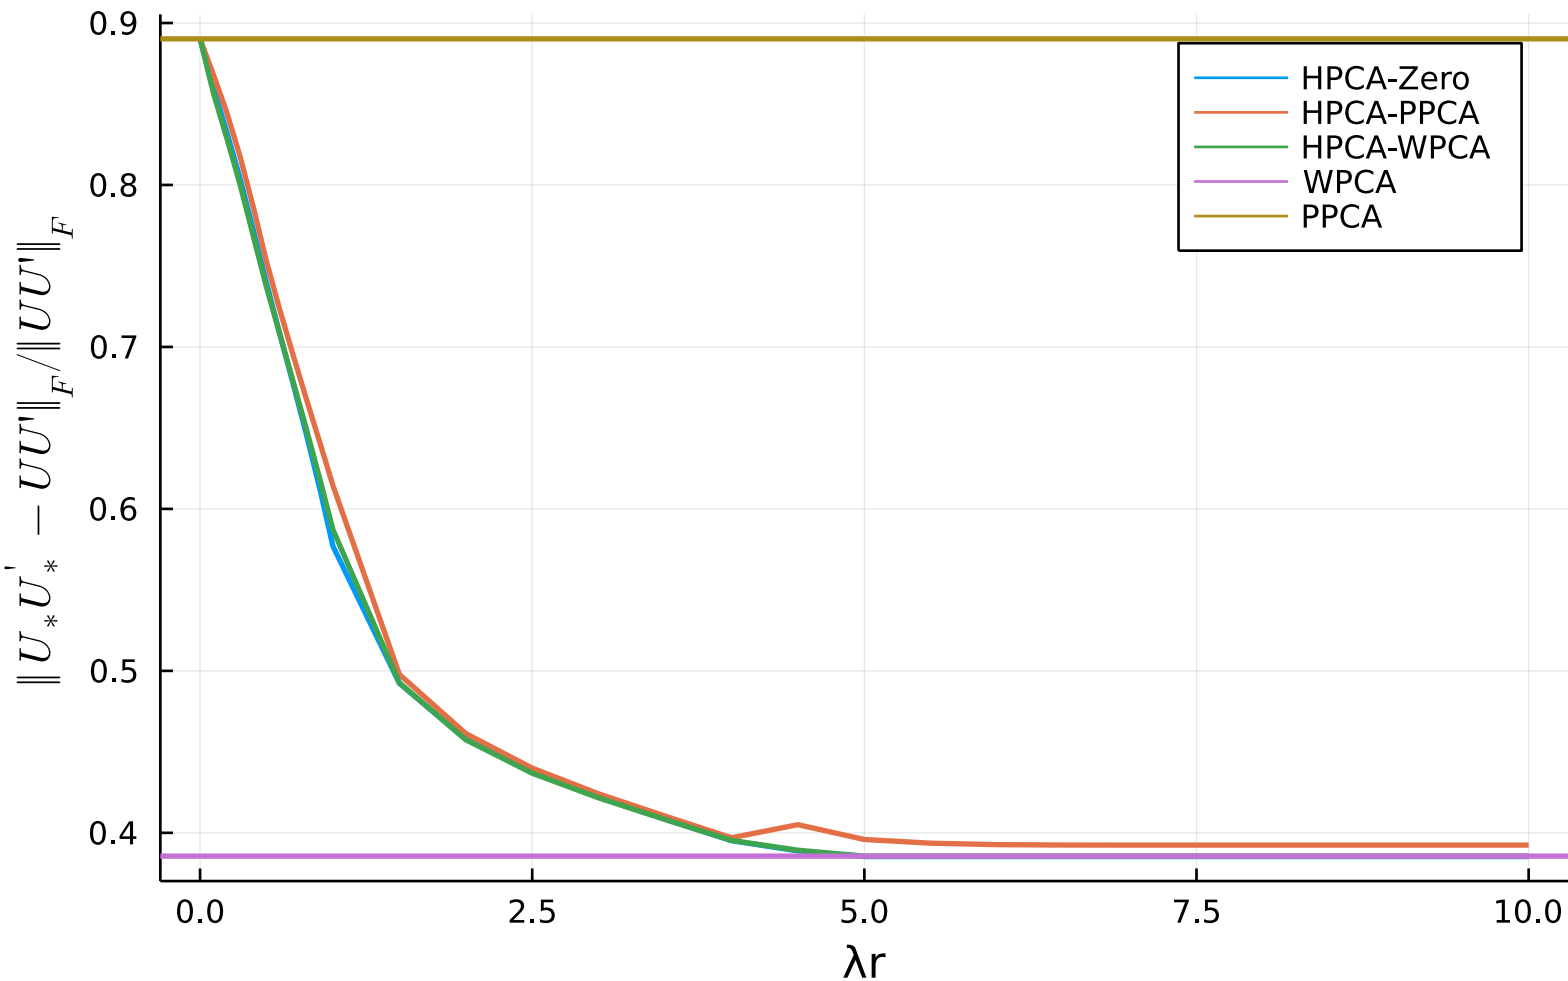

Supplement: supplementary_material [file attachment]

Variance Ratio  $v2/v1$ ,  $v1=1$

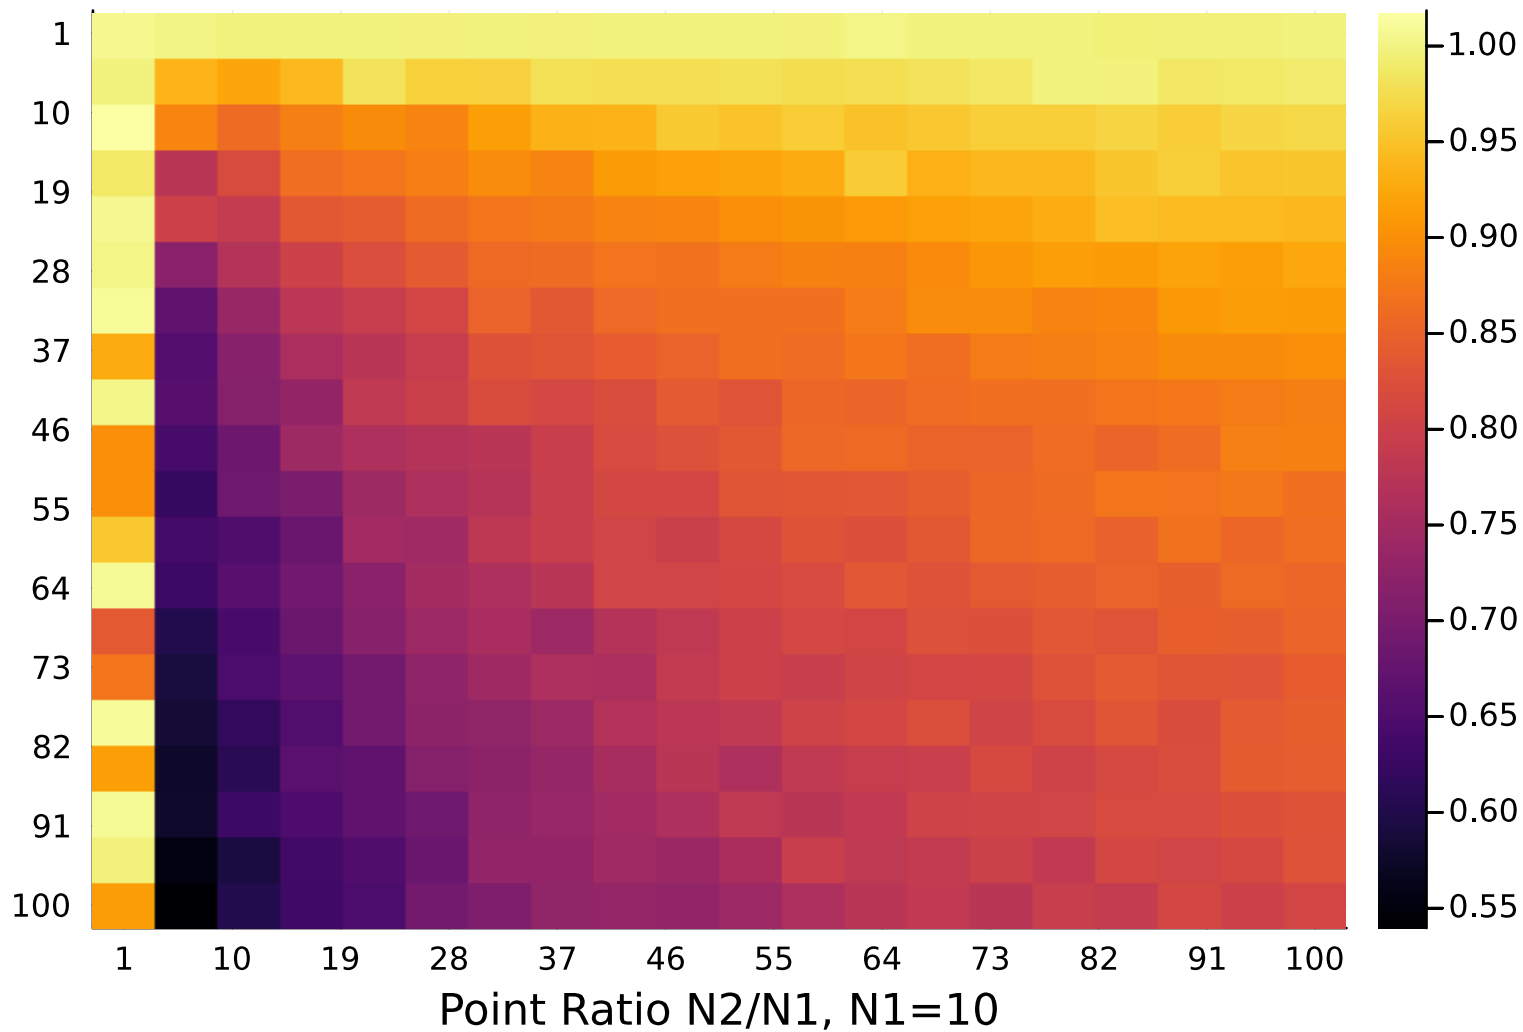

Supplement: supplementary_material [file attachment]

# HPCA/RPCA [UNKNOWN VAR, NO GROUPS]

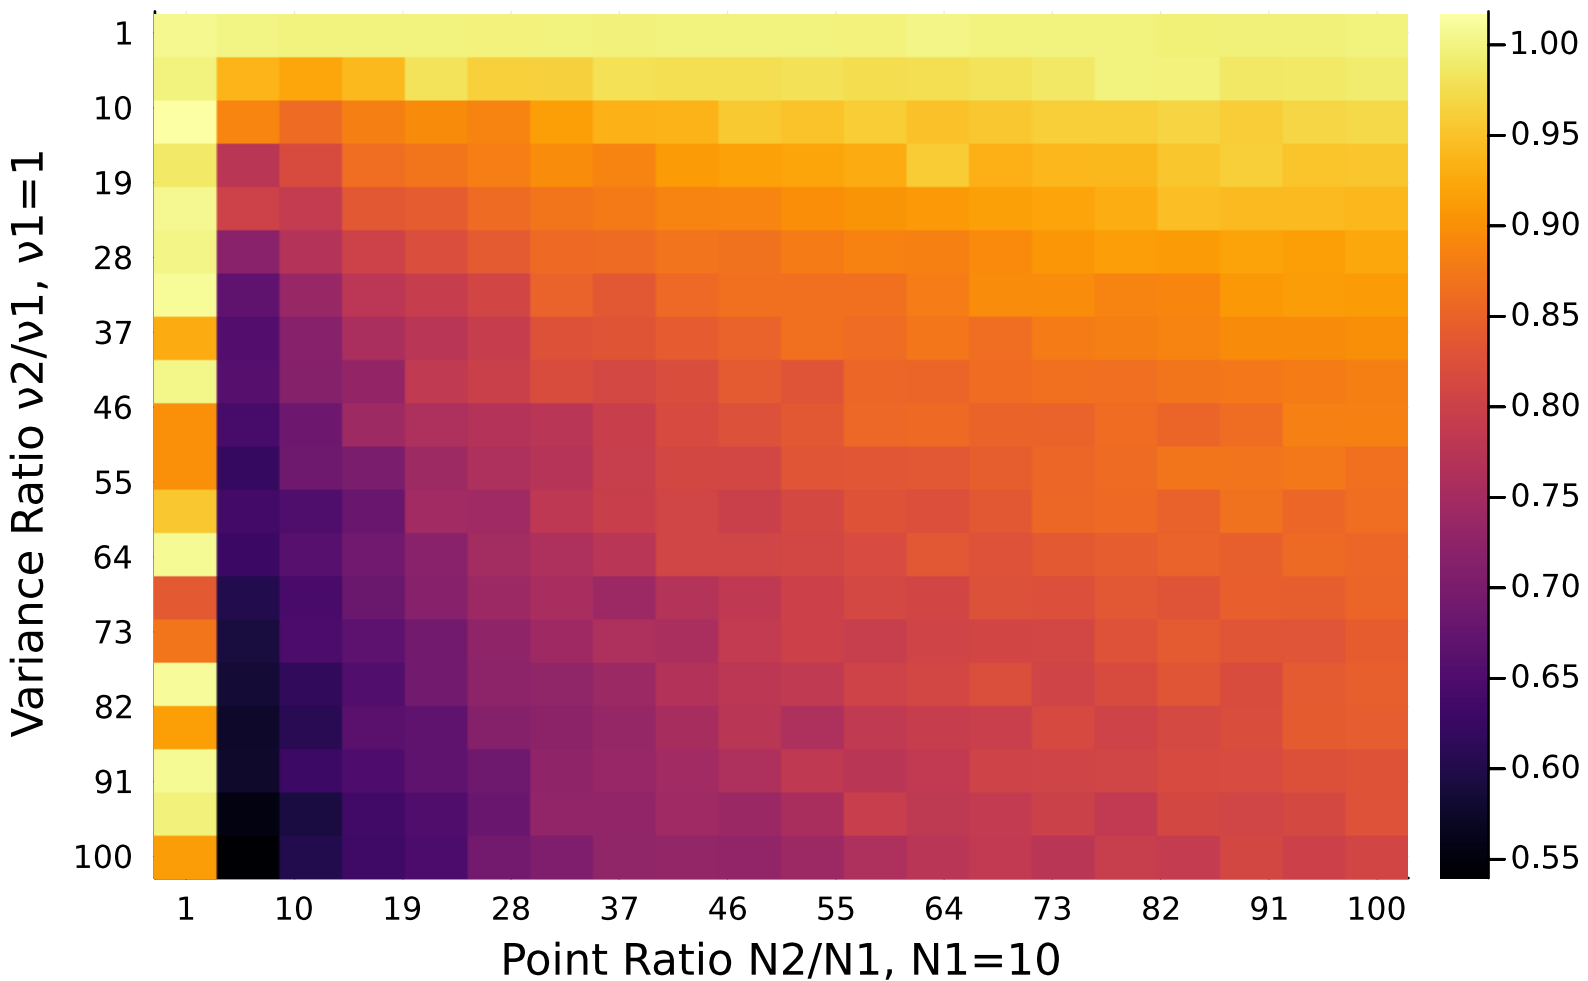

Supplement: supplementary_material [file attachment]

# HPCA ( $v$ known, zero init, good points $<$ rank)

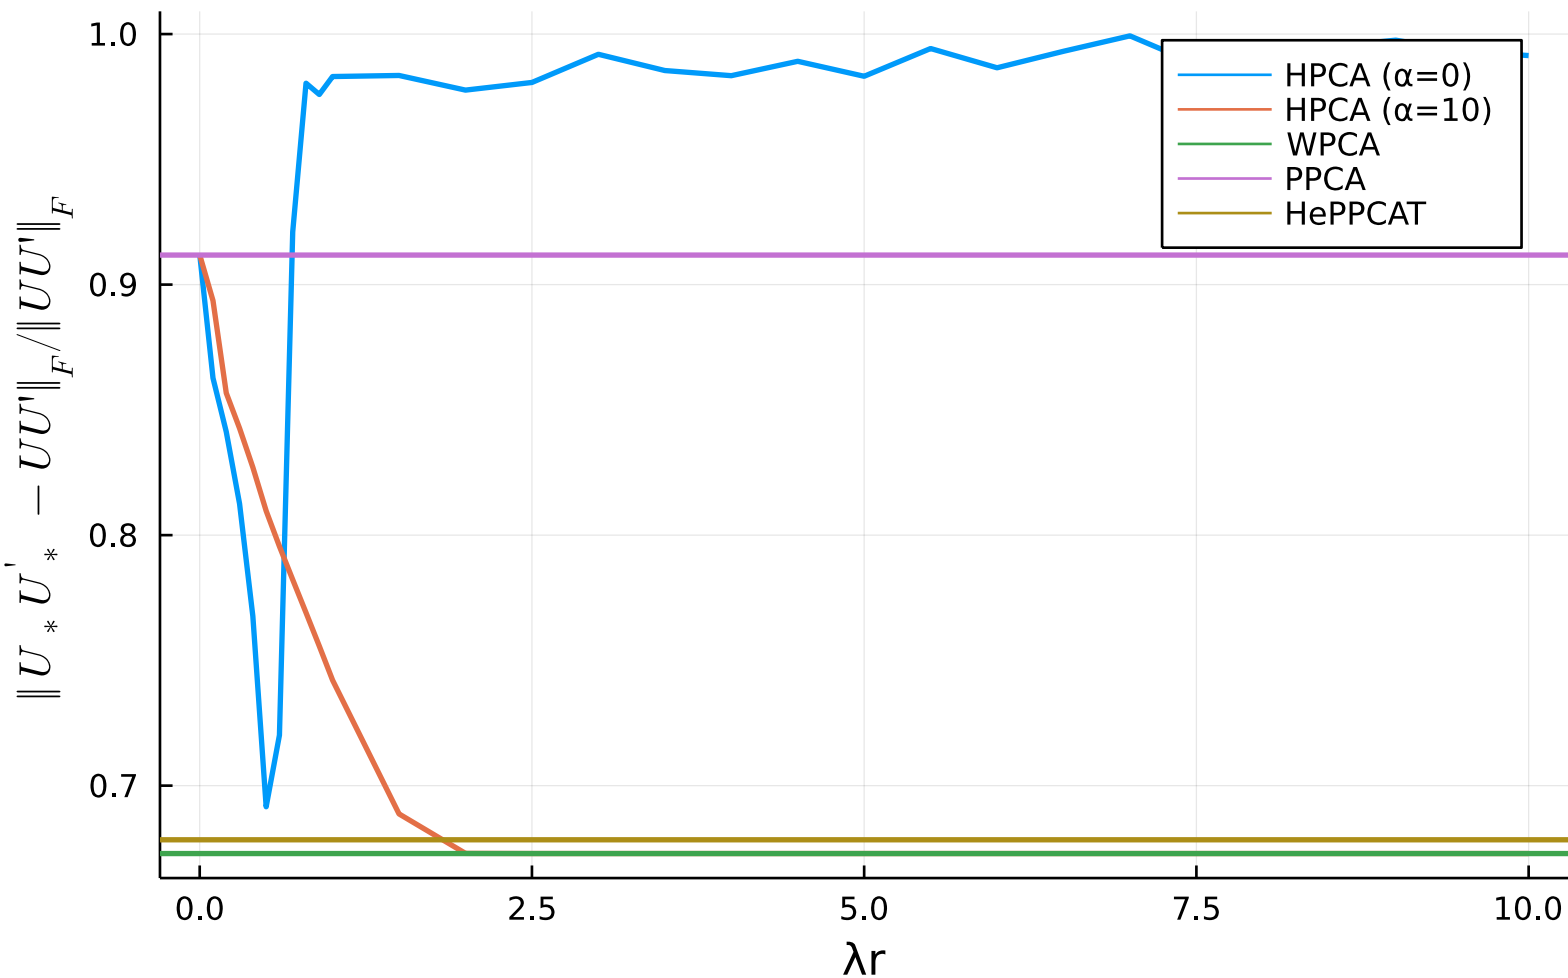

Supplement: supplementary_material [file attachment]

10 trials, uniform data,  $v$  unknown no groups

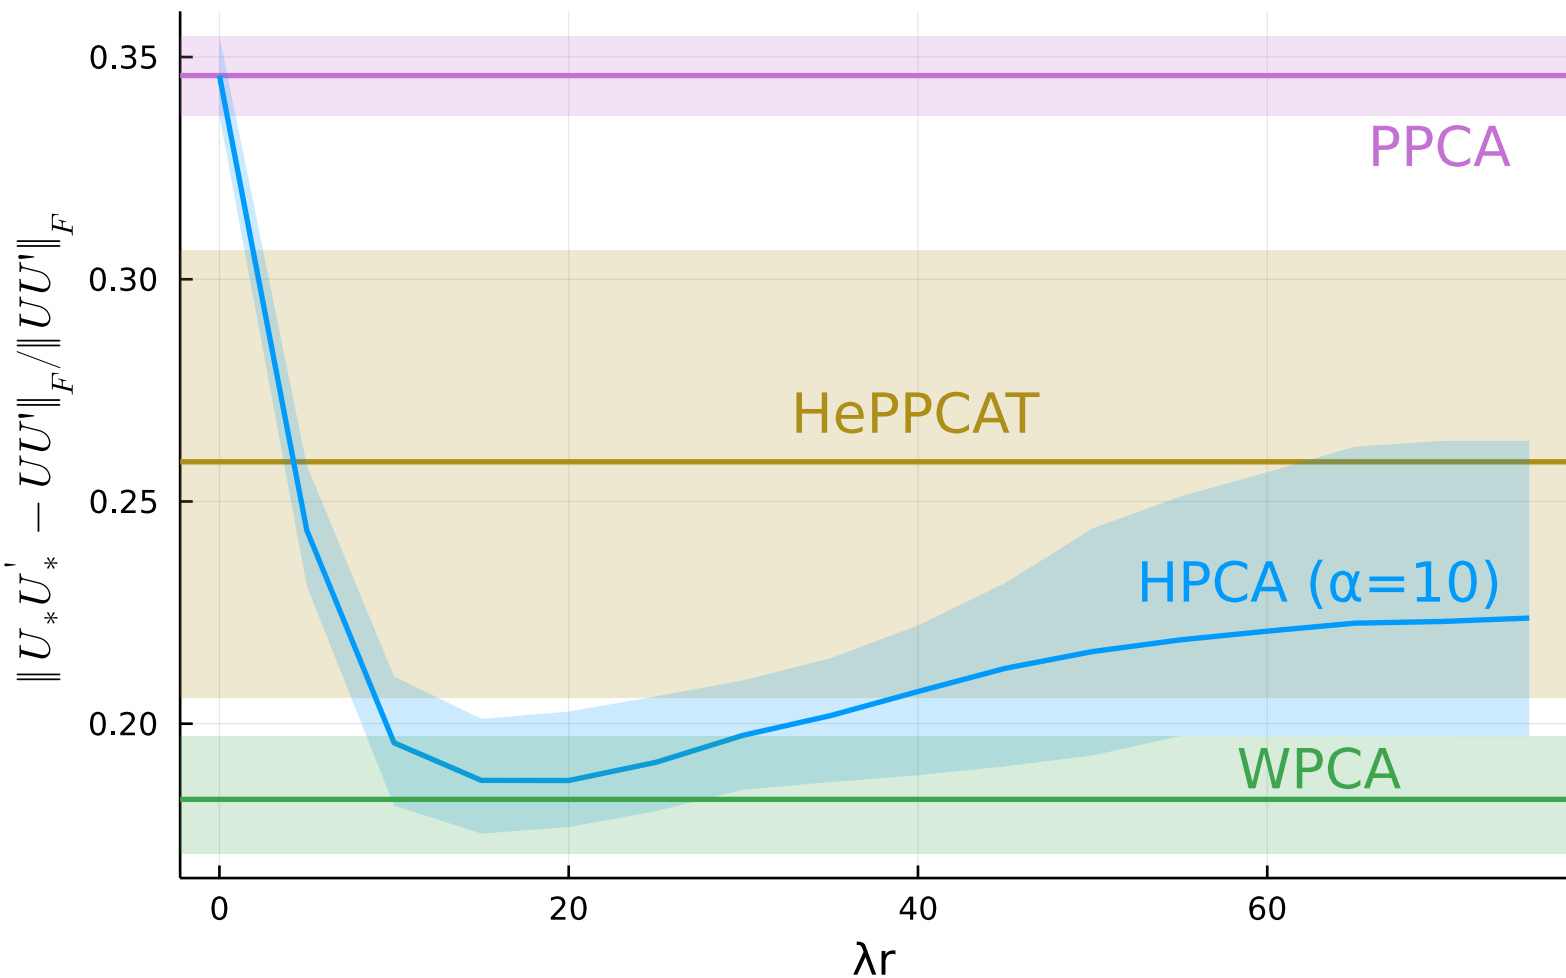

Supplement: supplementary_material [file attachment]

# HPCA (v unknown, groups, good points < rank)

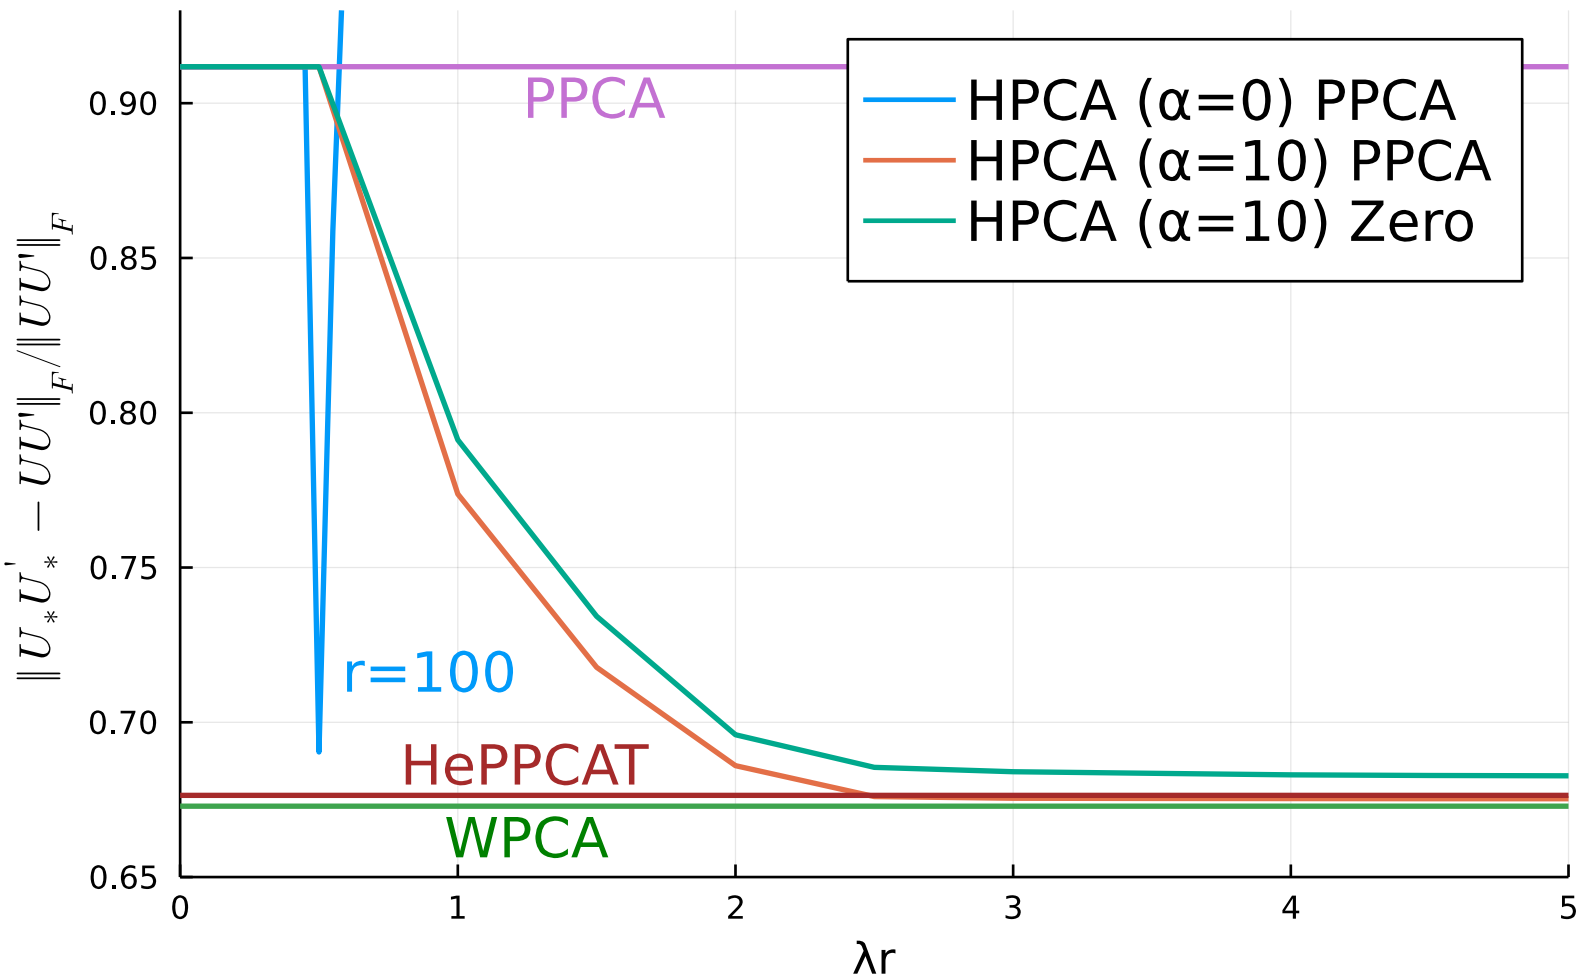

Supplement: supplementary_material [file attachment]

# Subspace Affinity Error HPCA/PCA

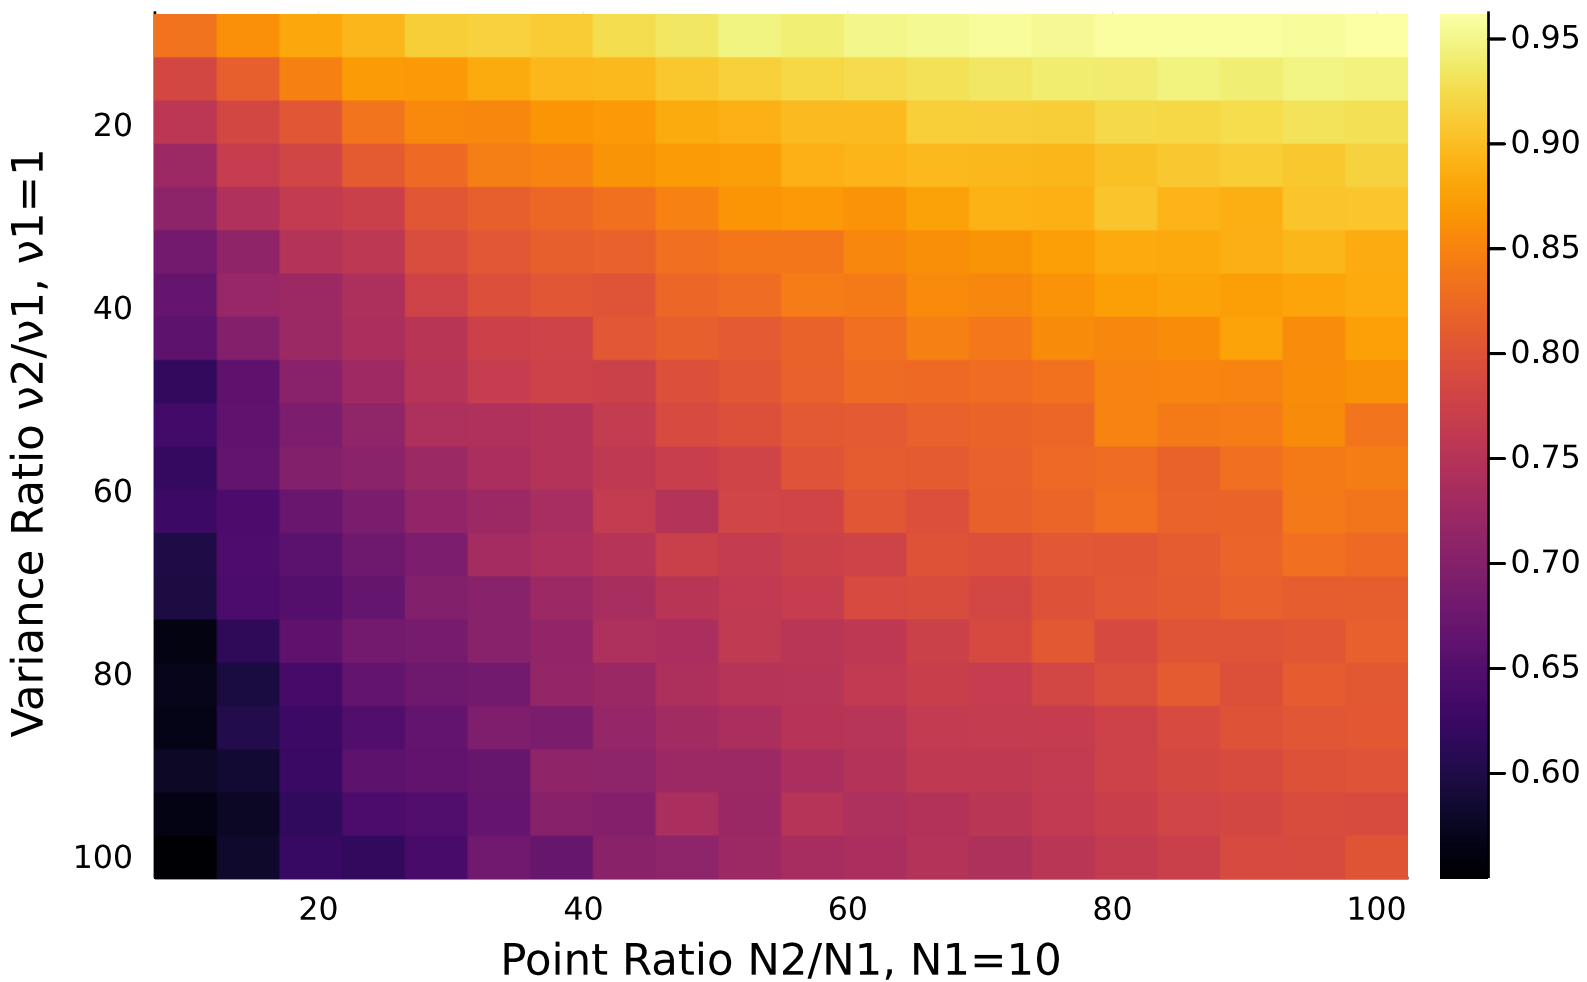

Supplement: supplementary_material [file attachment]

unknown var, APGD zero init

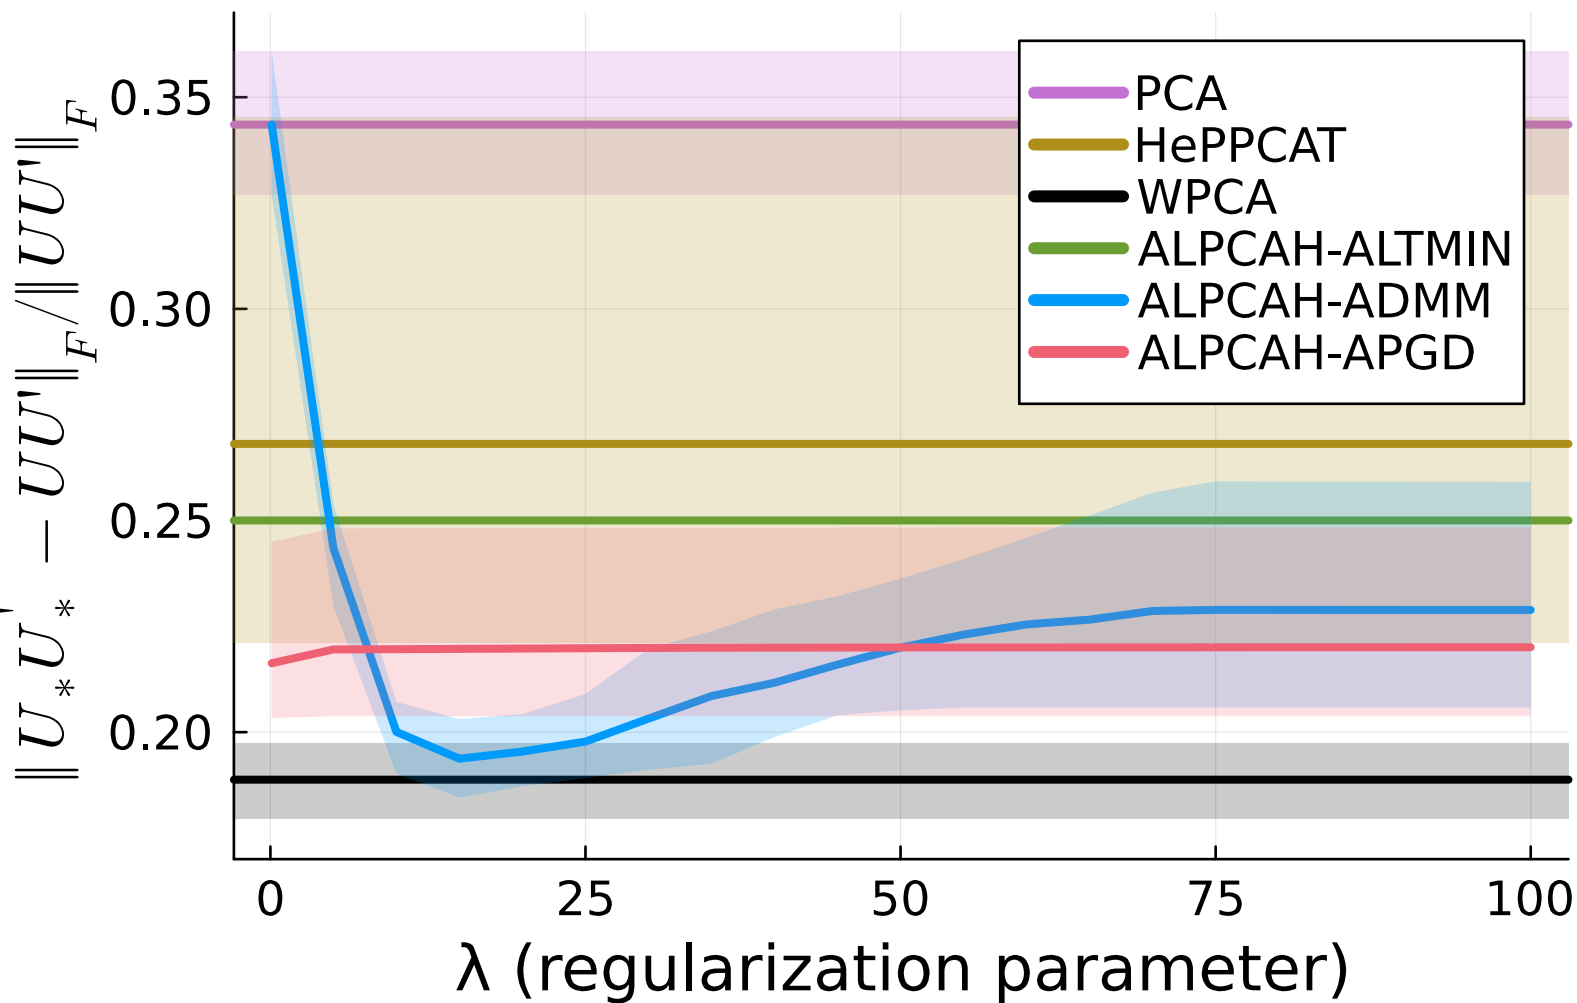

Supplement: supplementary_material [file attachment]

10 trials, gaussian, N=500, w known

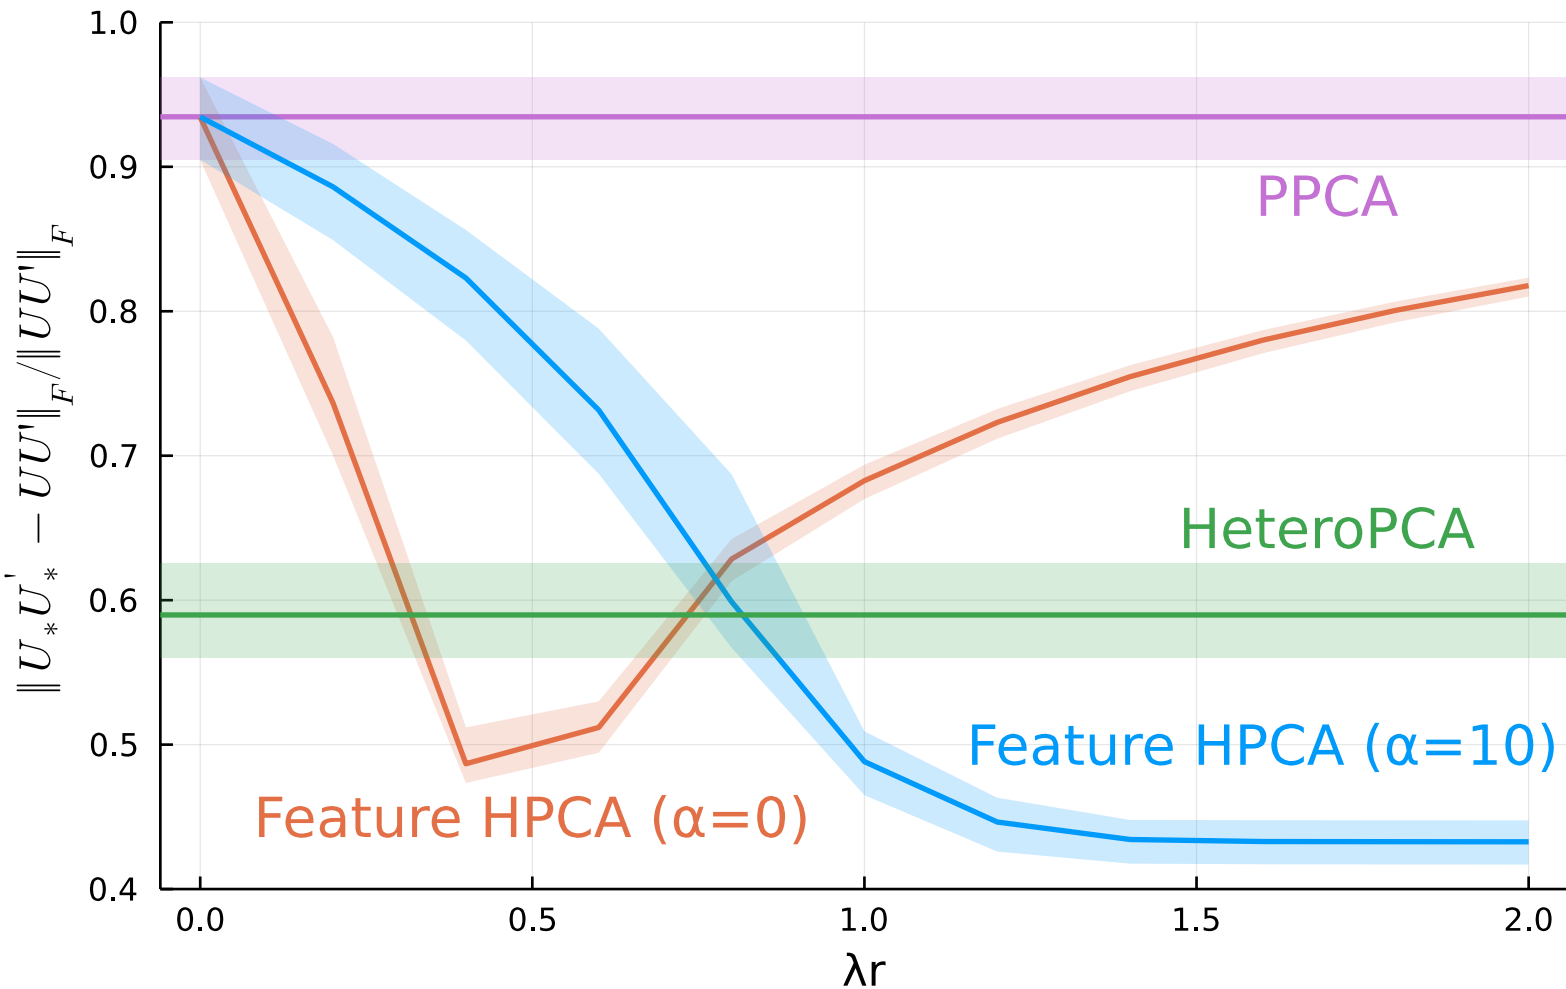

Supplement: supplementary_material [file attachment]

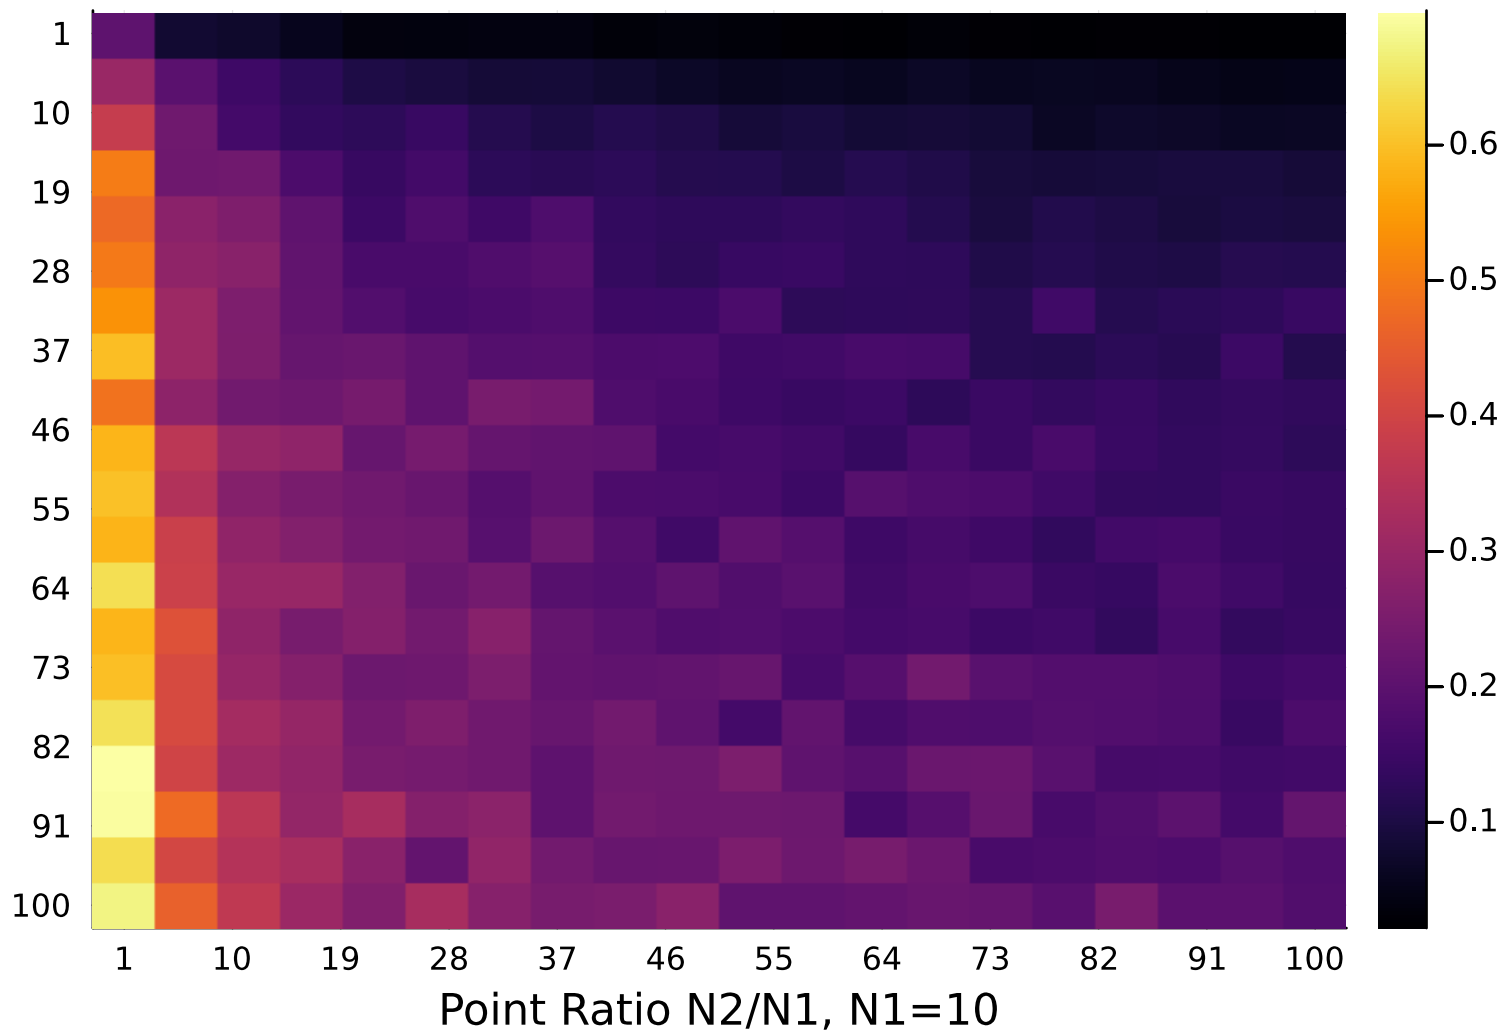

Supplement: supplementary_material [file attachment]

## HPCA [UNKNOWN VAR, NO GROUPS]

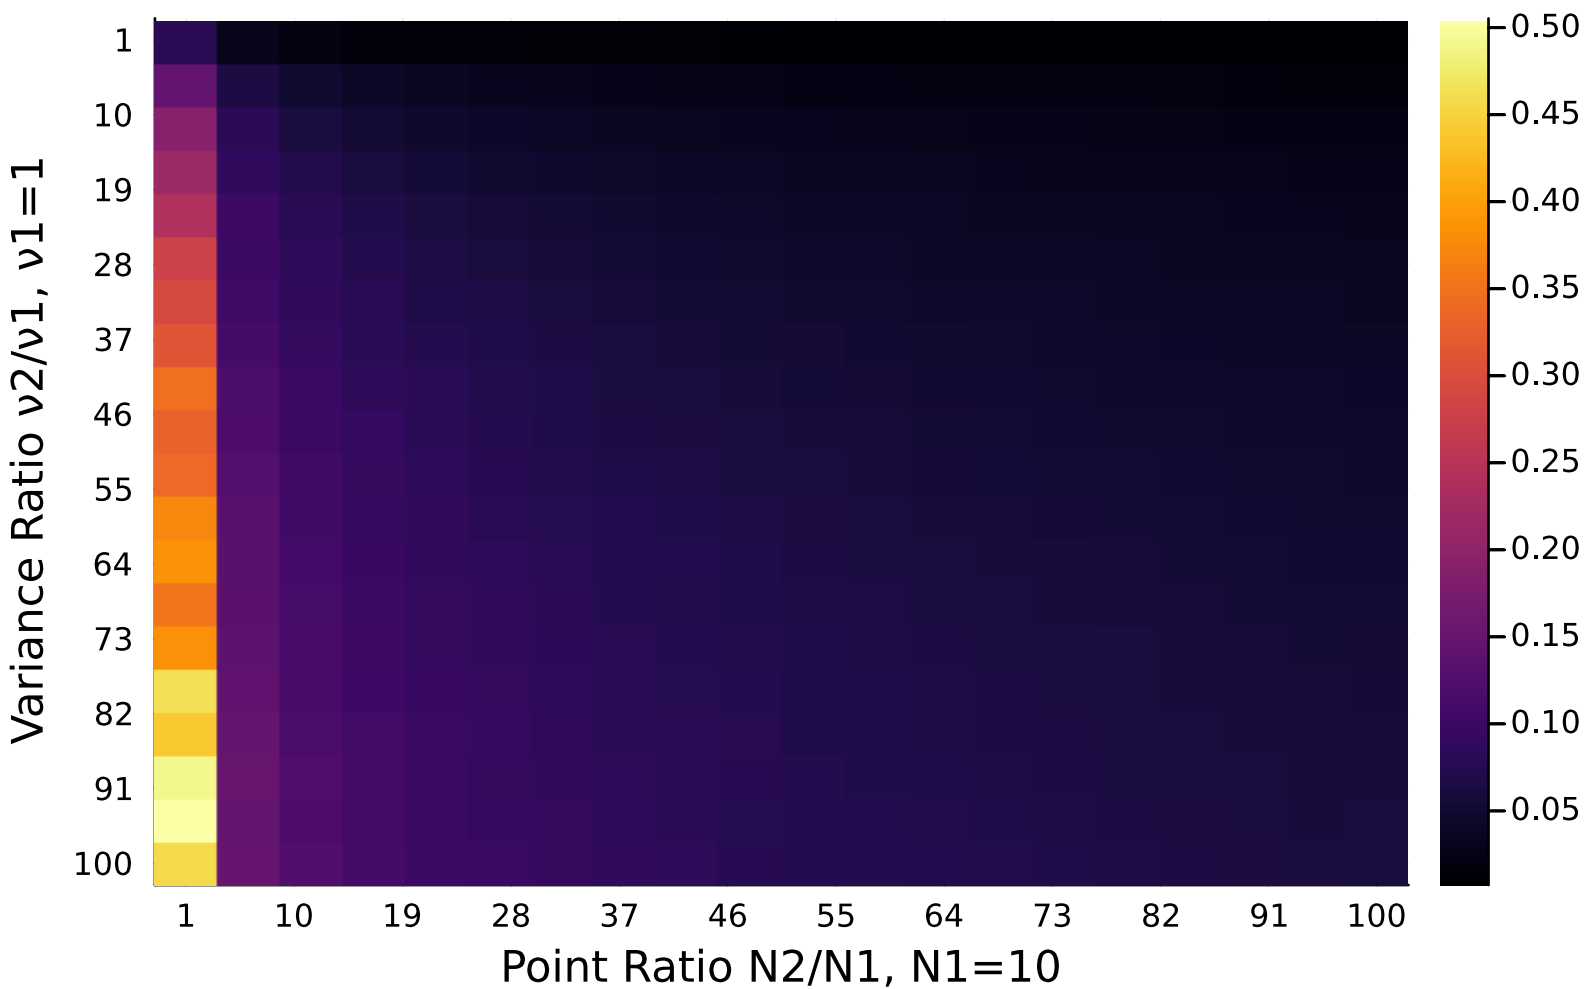

Supplement: supplementary_material [file attachment]

# HPCA/PCA [KNOWN VAR]

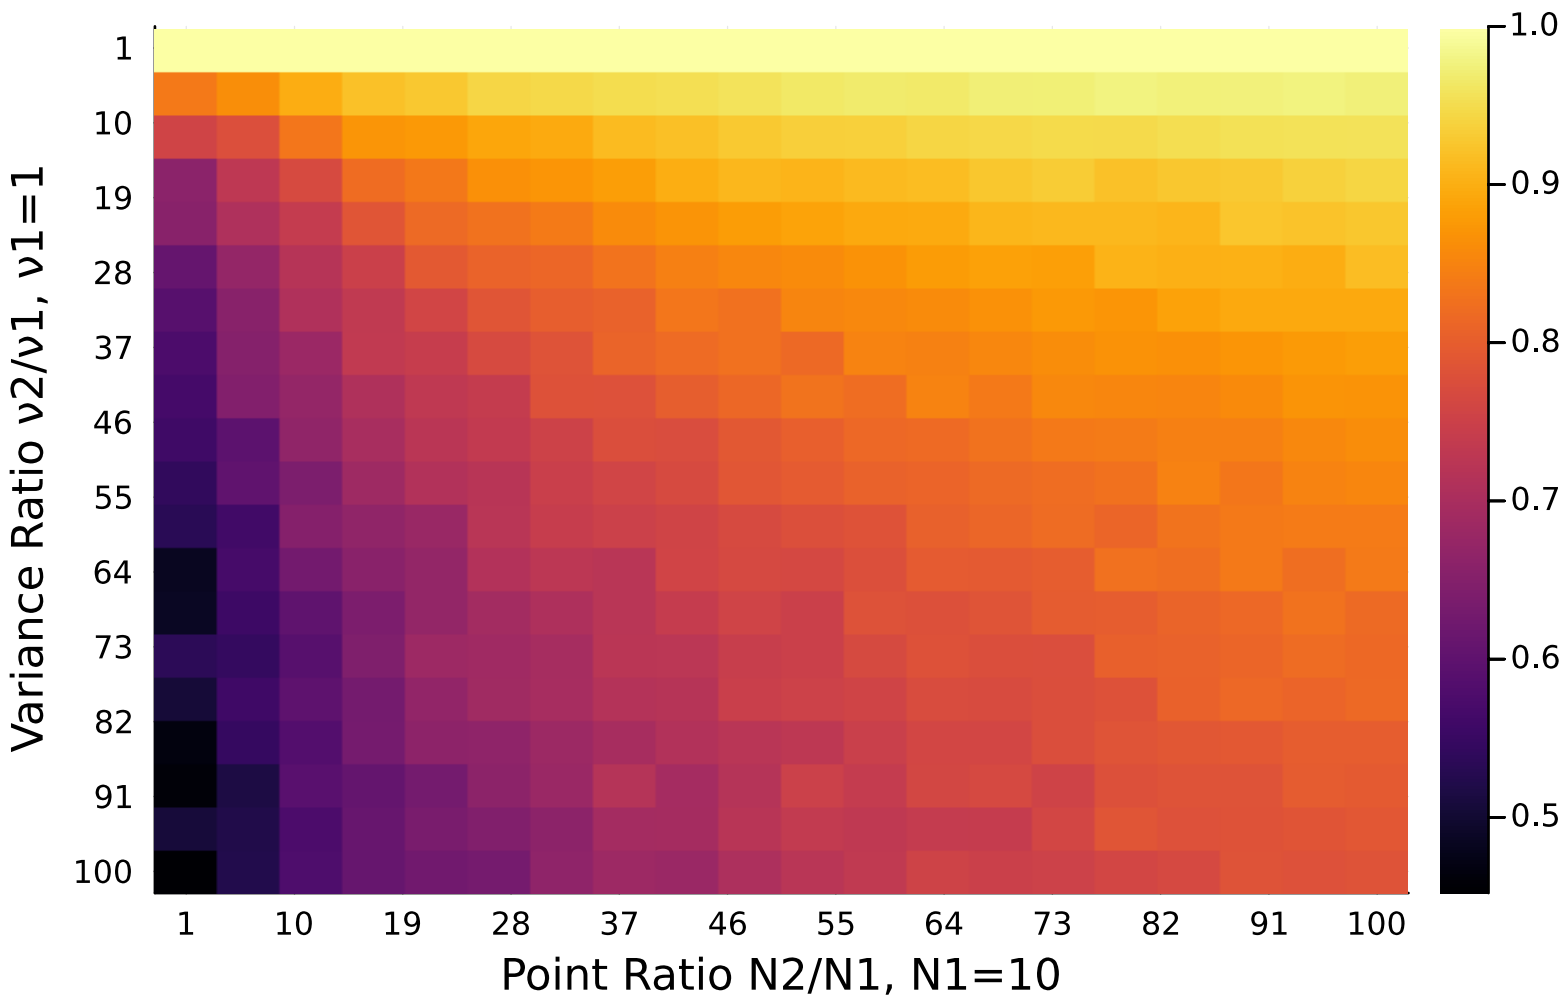

Supplement: supplementary_material [file attachment]

unknown var, zero init X,Z



Supplement: supplementary_material [file attachment]

# HEPPCAT [UNKNOWN VAR, NO GROUPS]

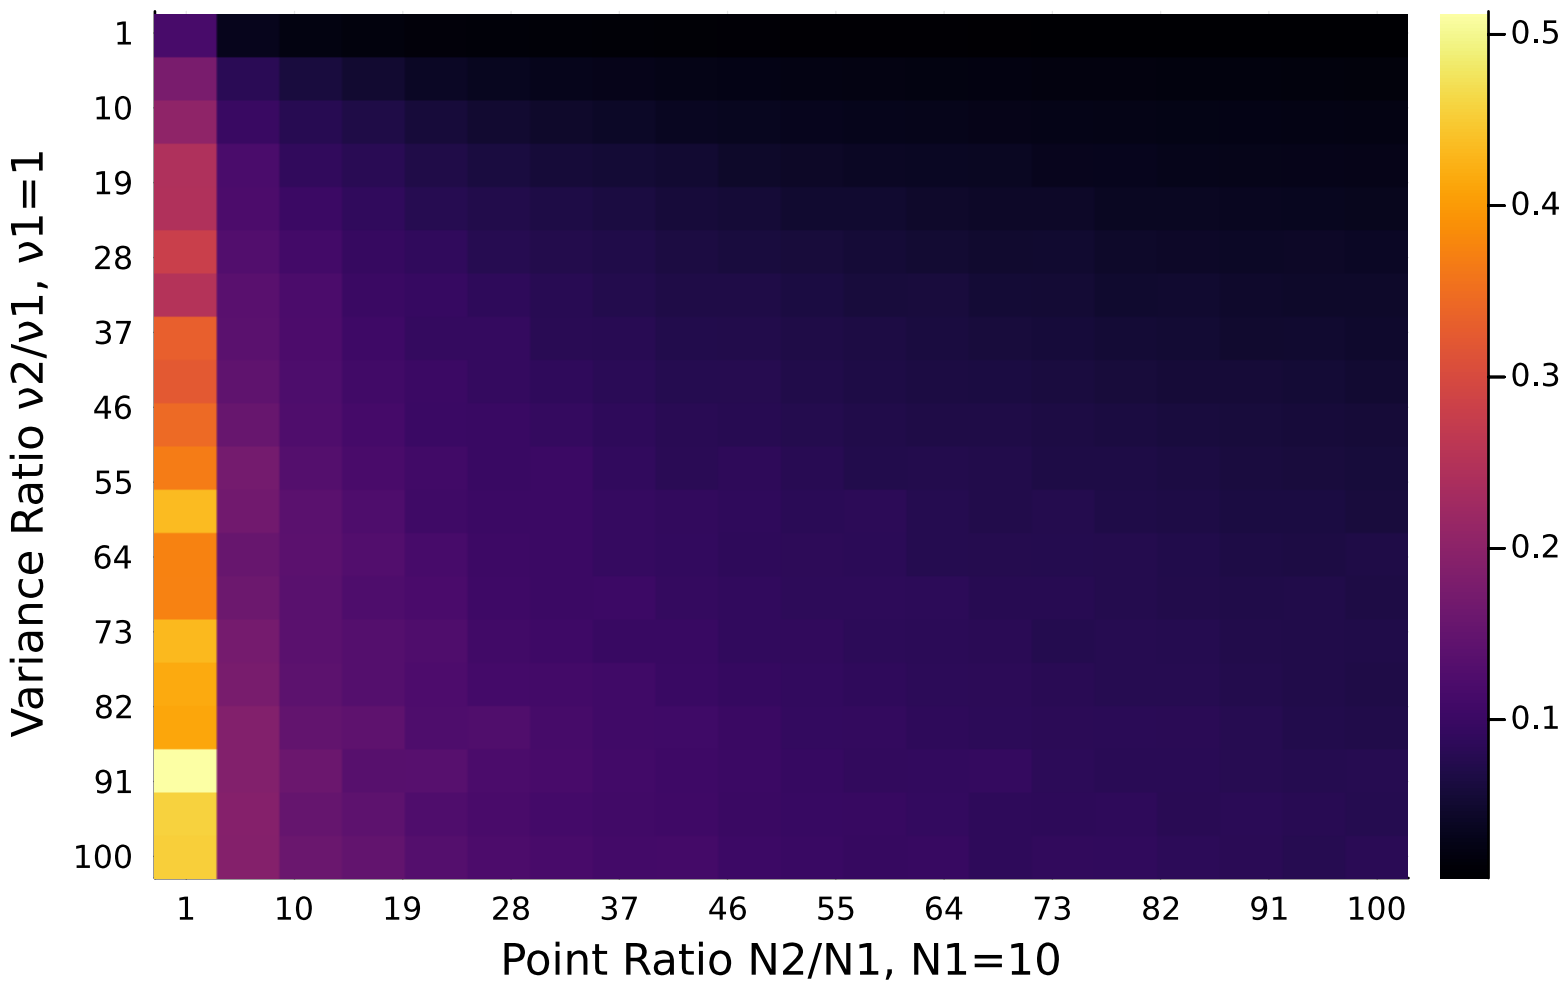

Supplement: supplementary_material [file attachment]

10 trials, gaussian, N=500, v unknown no groups

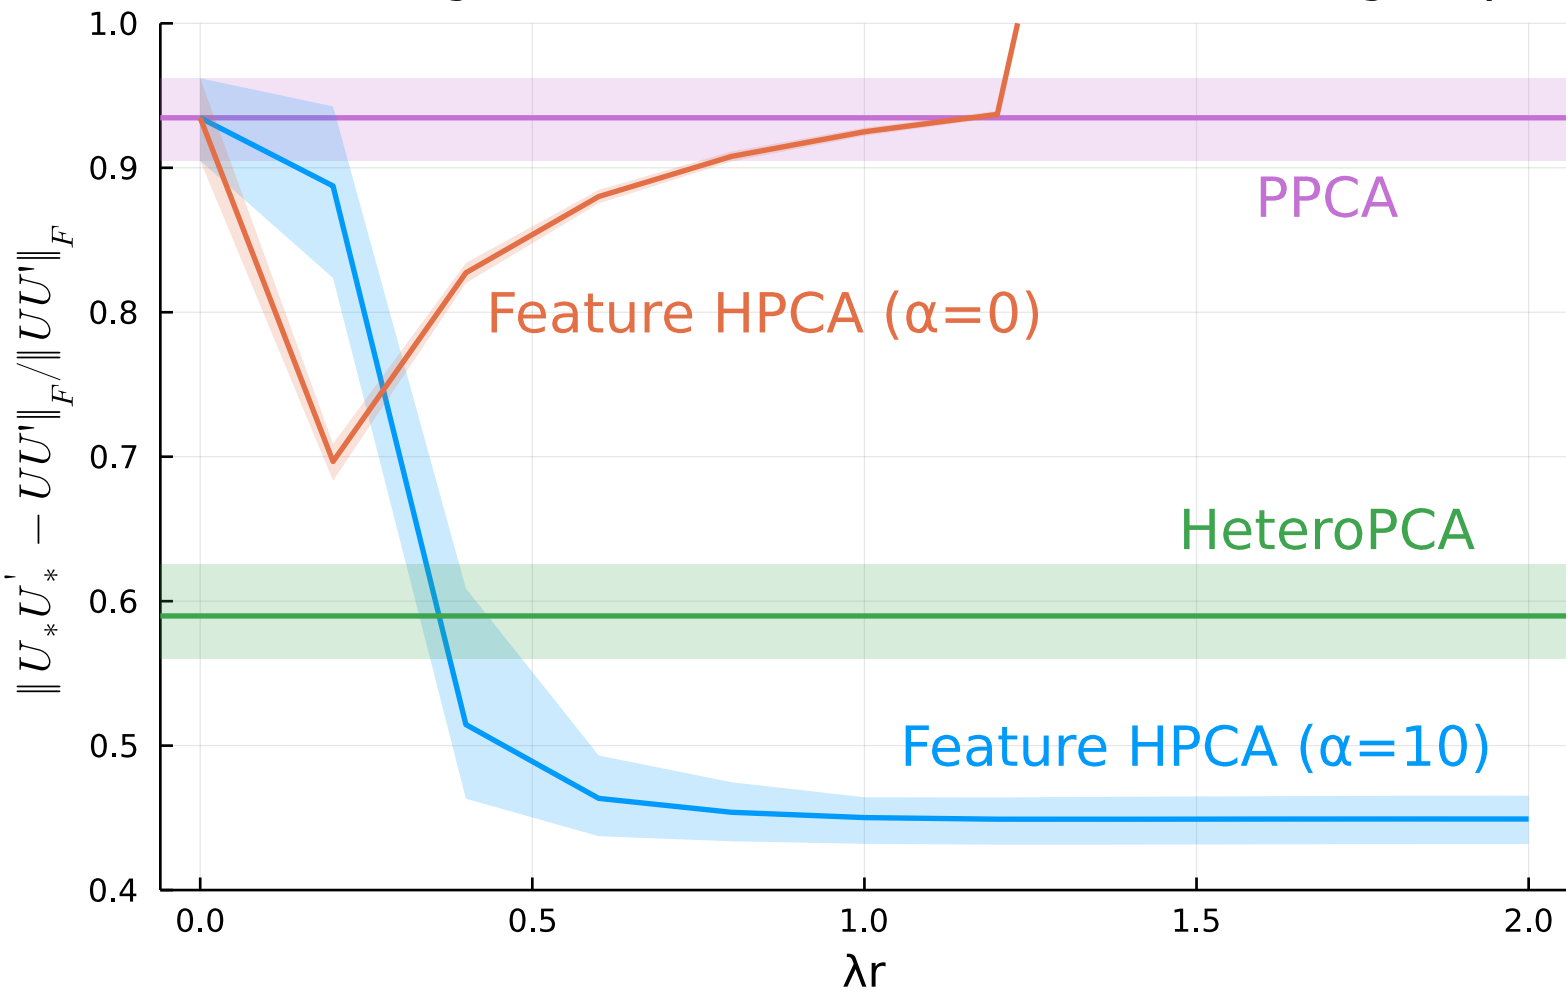

Supplement: supplementary_material [file attachment]

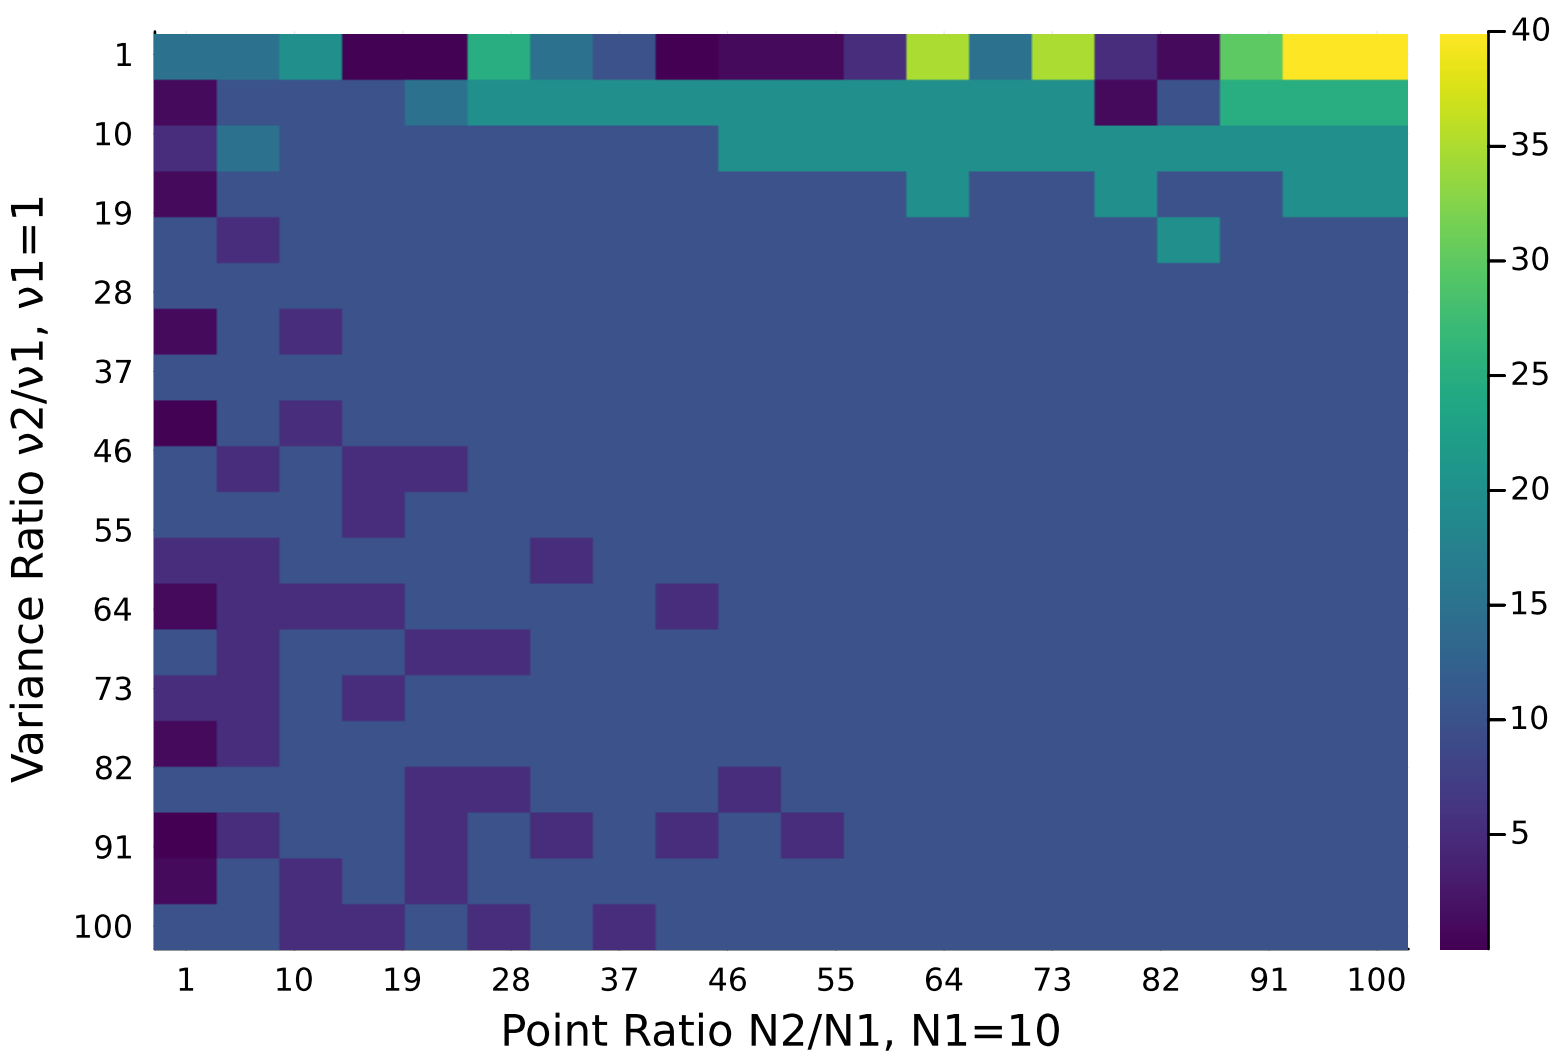

Supplement: supplementary_material [file attachment]

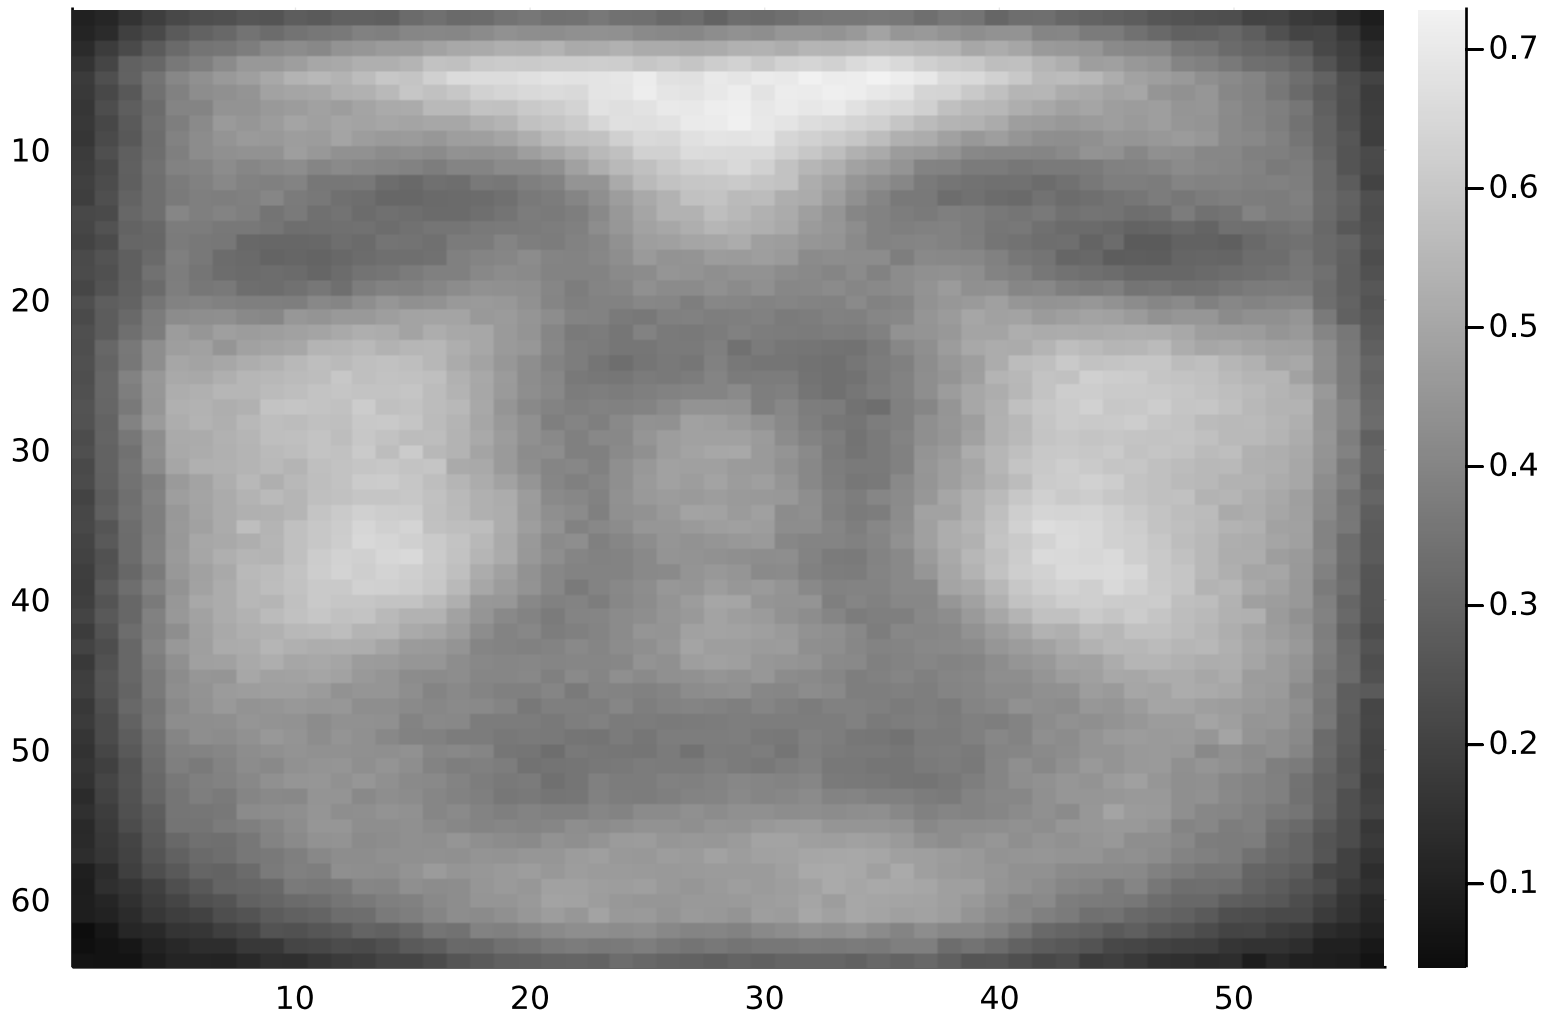

Supplement: supplementary_material [file attachment]

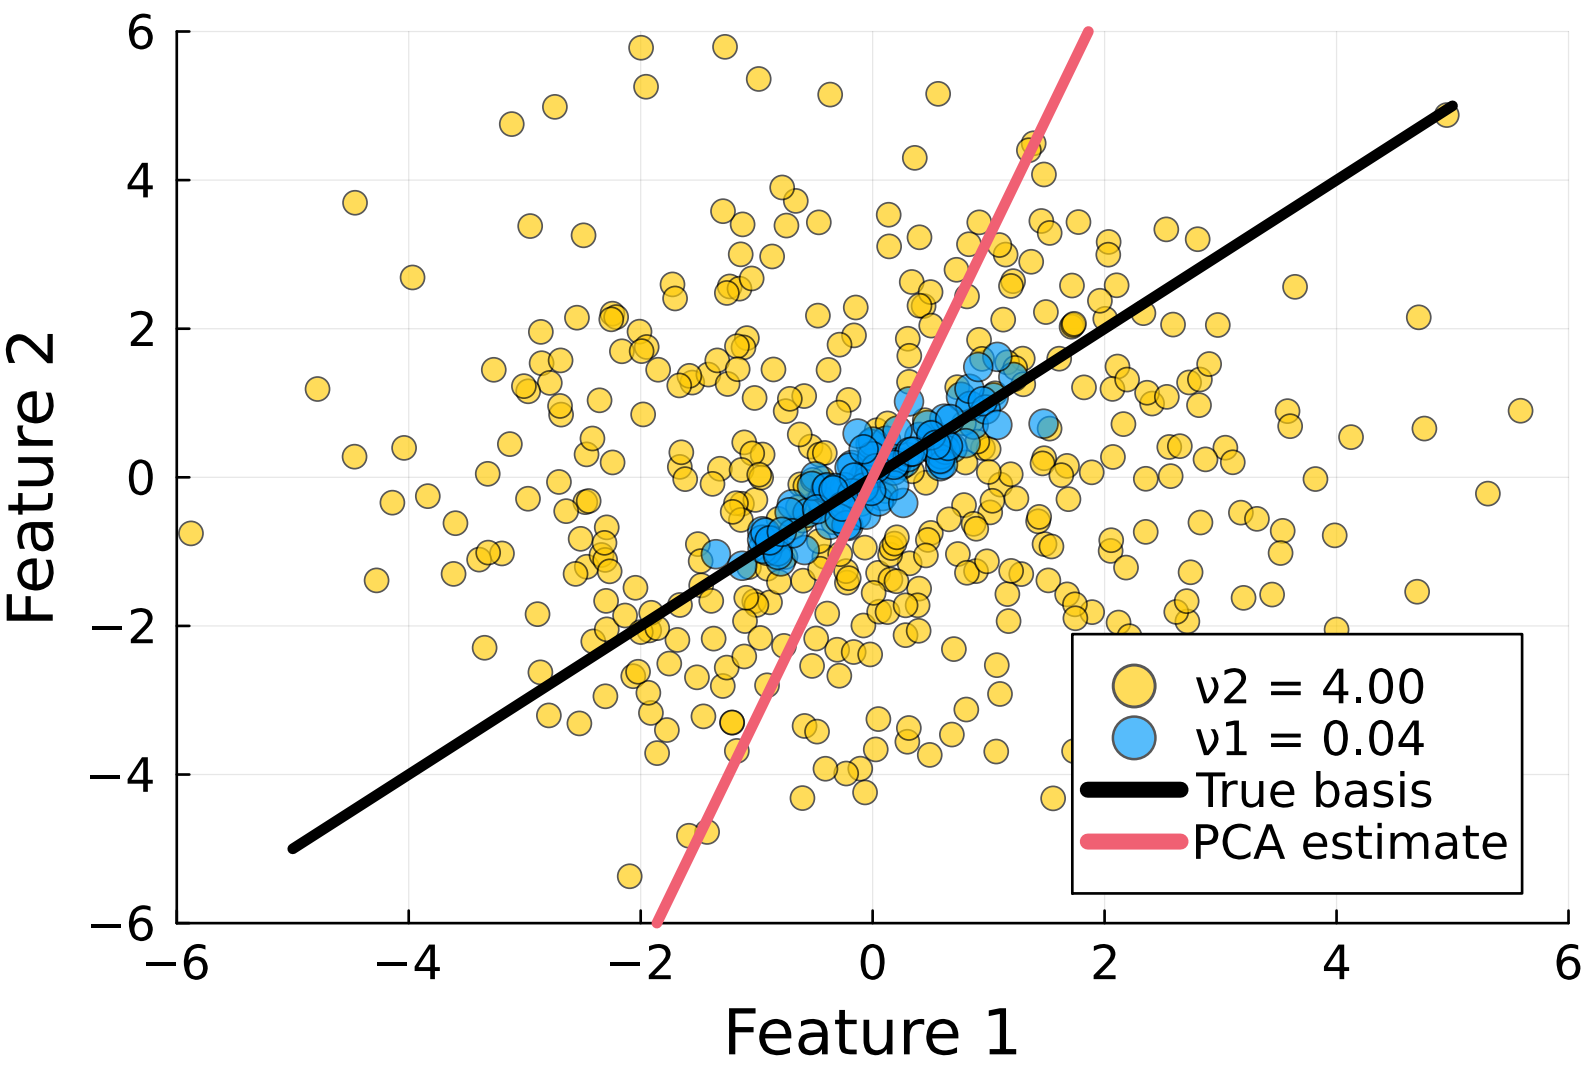

Supplement: supplementary_material [file attachment]

# Subspace Affinity Error HPCA/PCA (good pts. only)

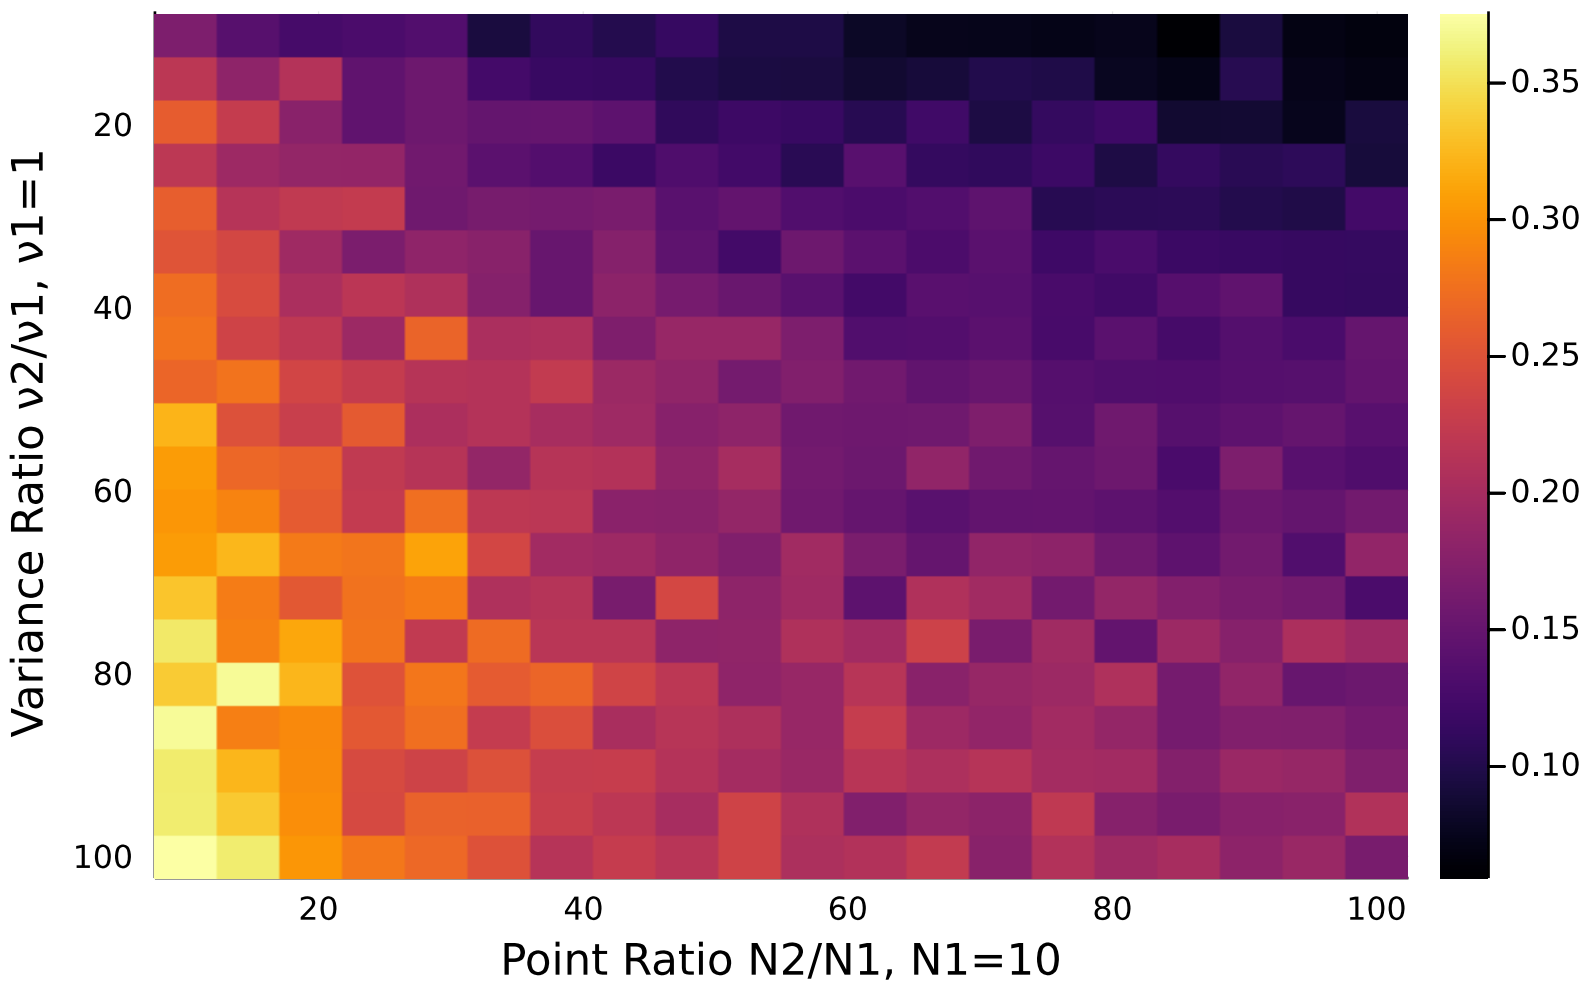

Supplement: supplementary_material [file attachment]

# HPCA (v unknown, groups, good points < rank)

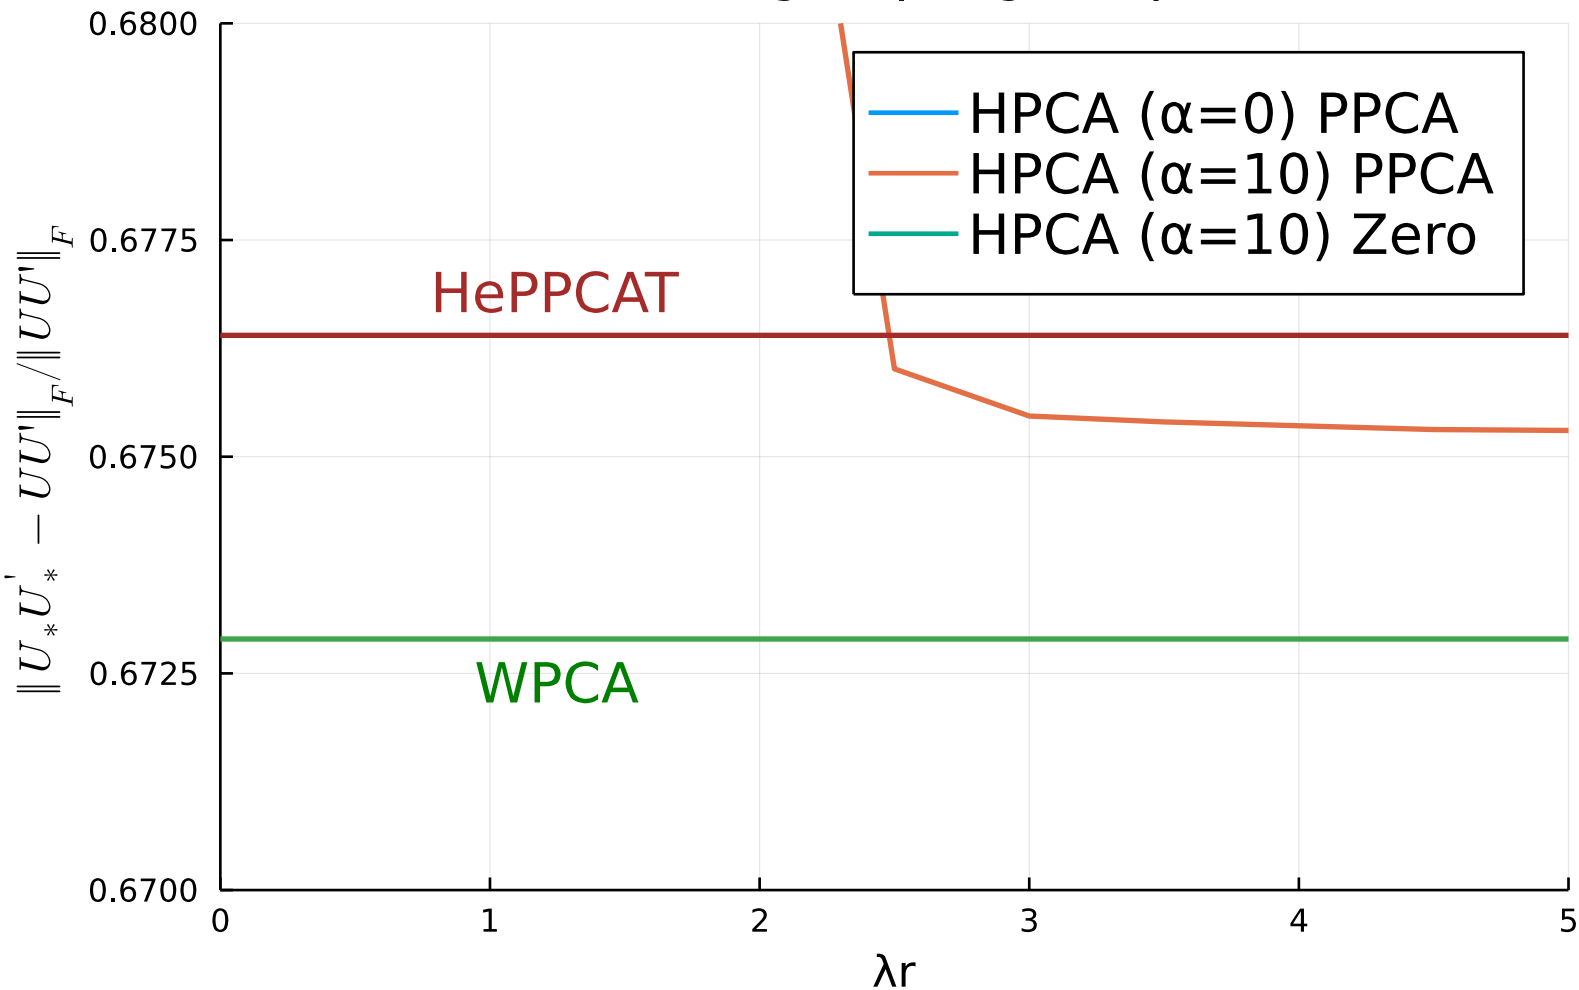

Supplement: supplementary_material [file attachment]

## HPCA/PCA-GOOD [KNOWN VAR]

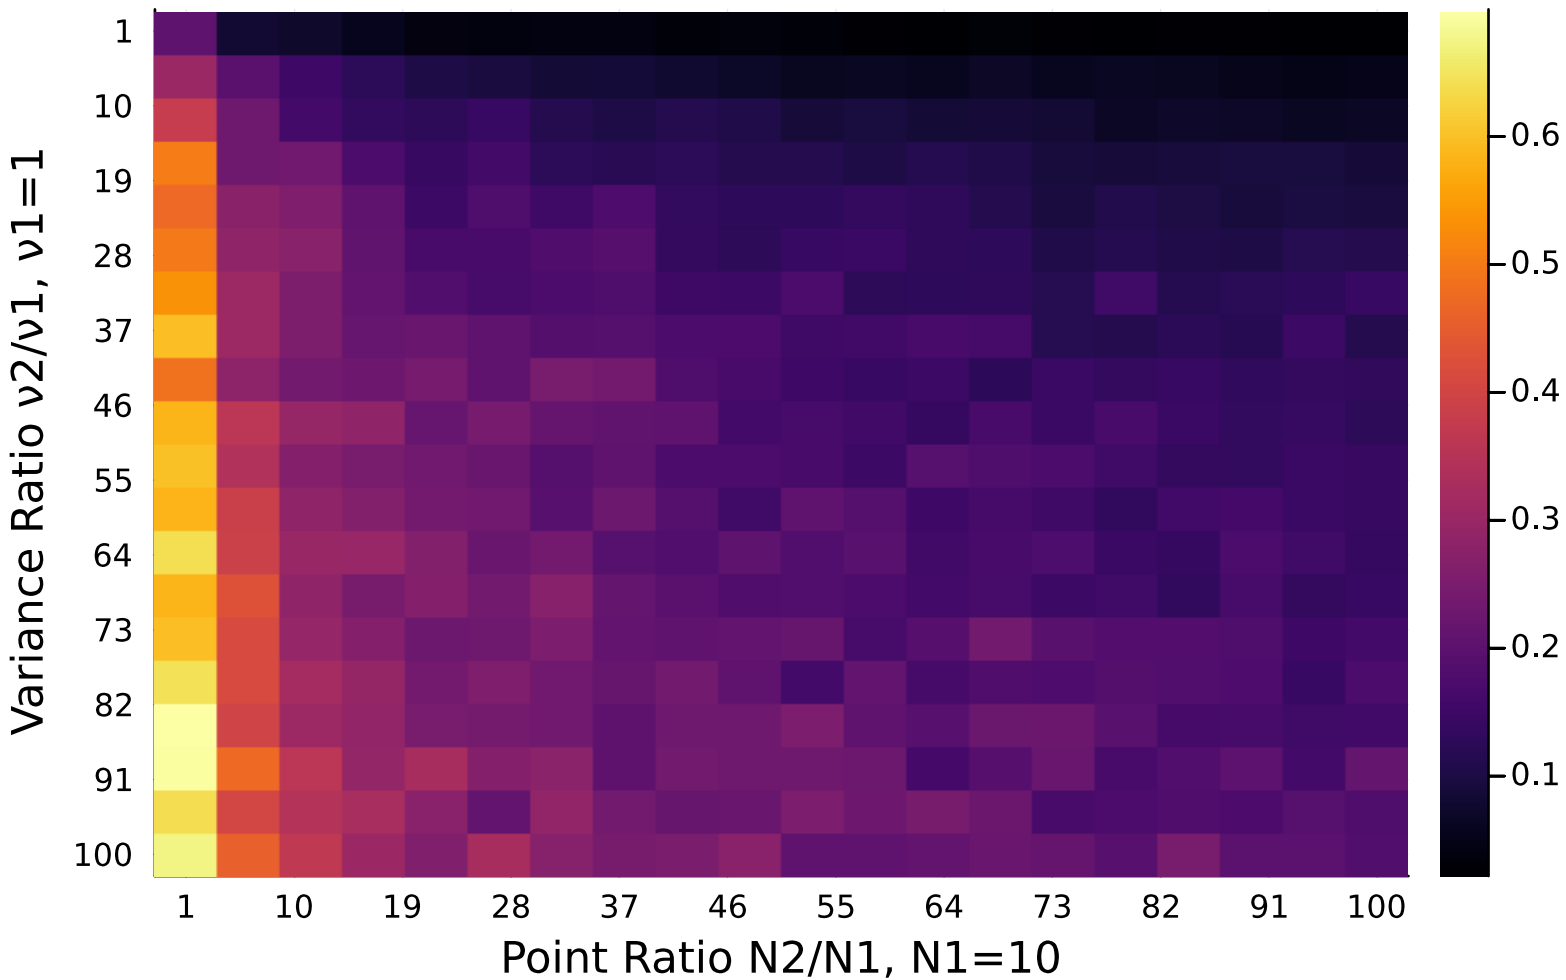

Supplement: supplementary_material [file attachment]

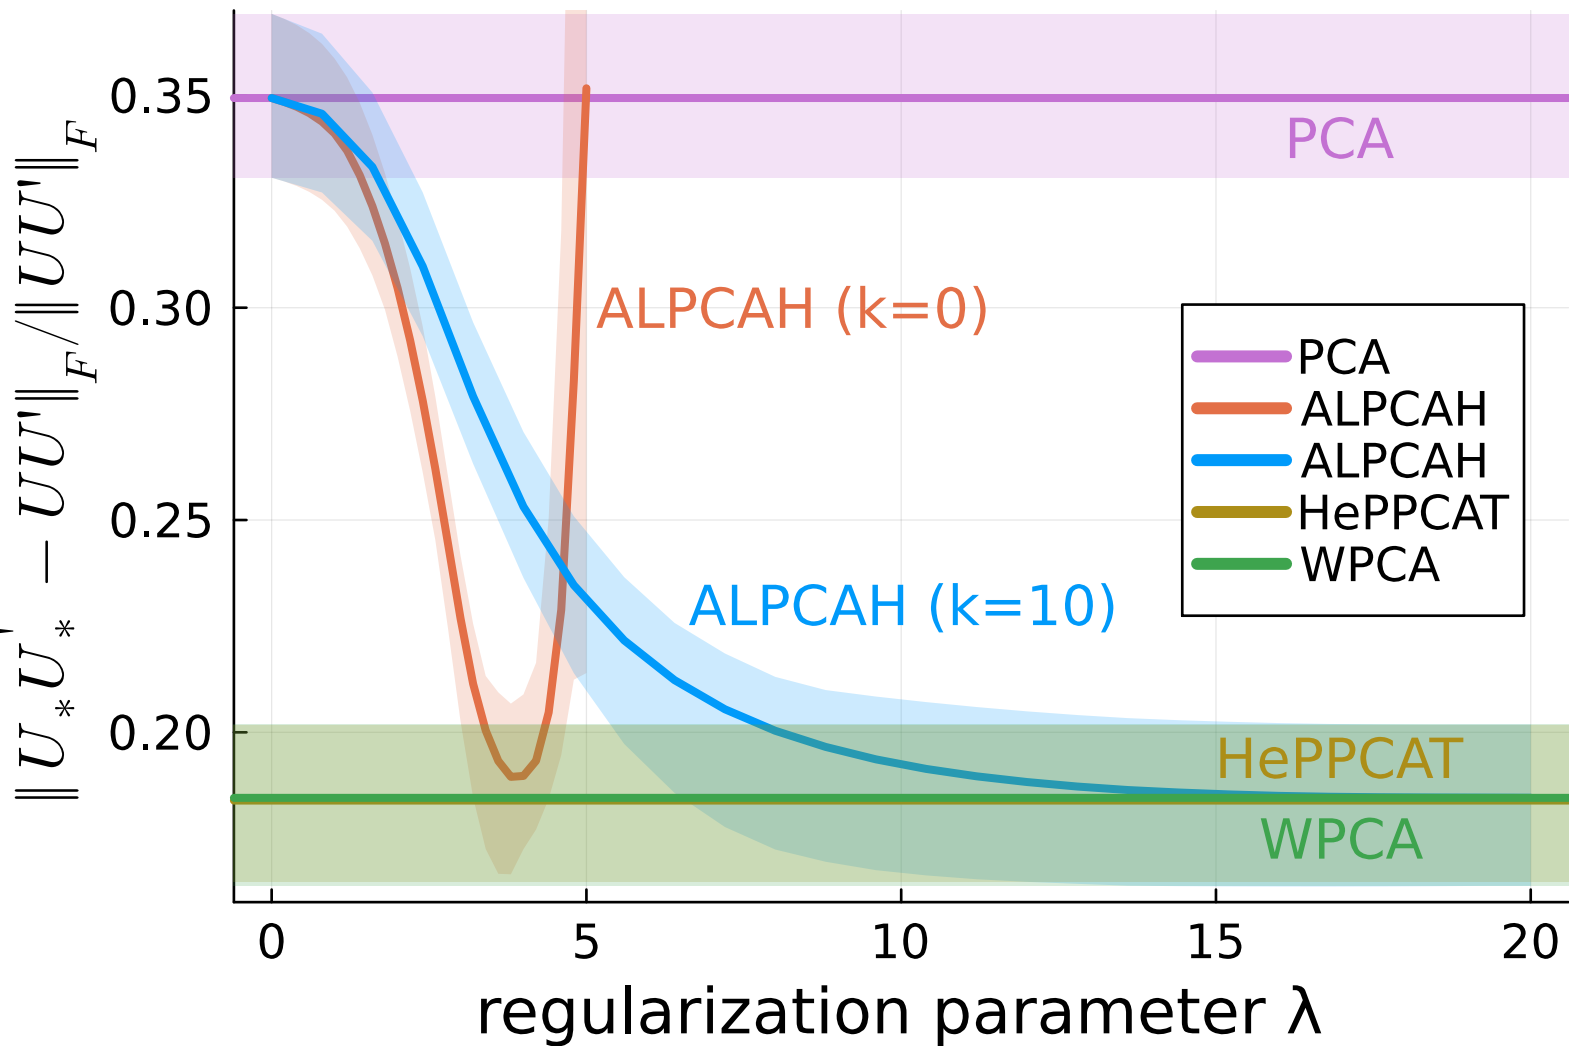

Supplement: supplementary_material [file attachment]

# Noise Variance Estimate (no groups)

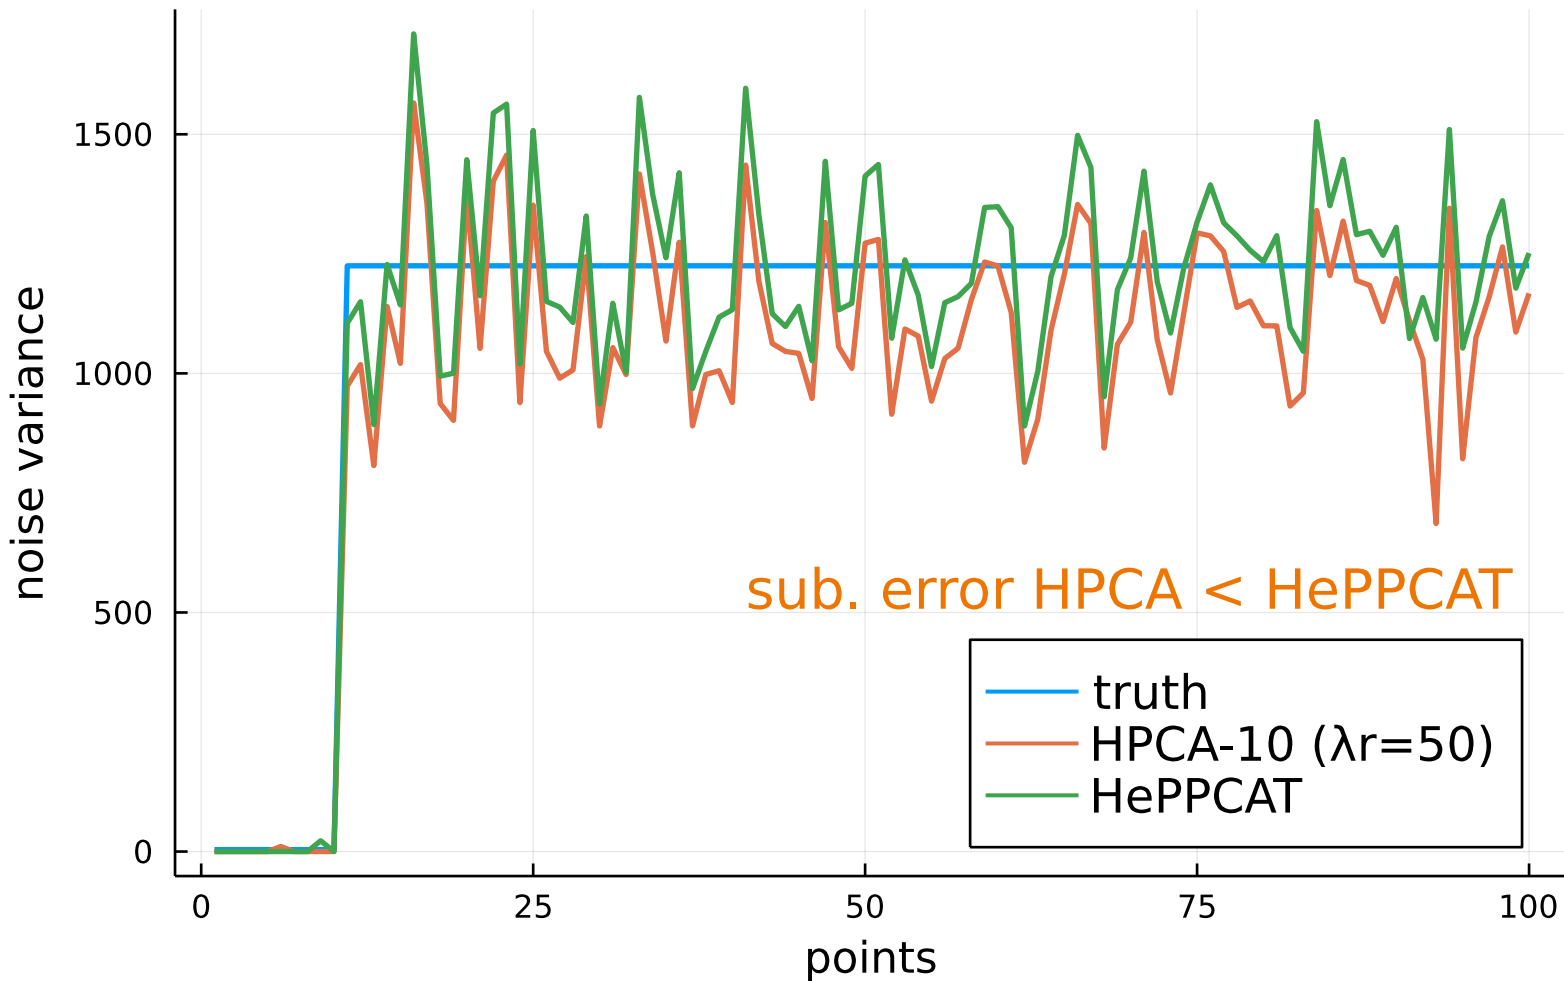

Supplement: supplementary_material [file attachment]

# HPCA (v known, zero init, good points < rank)

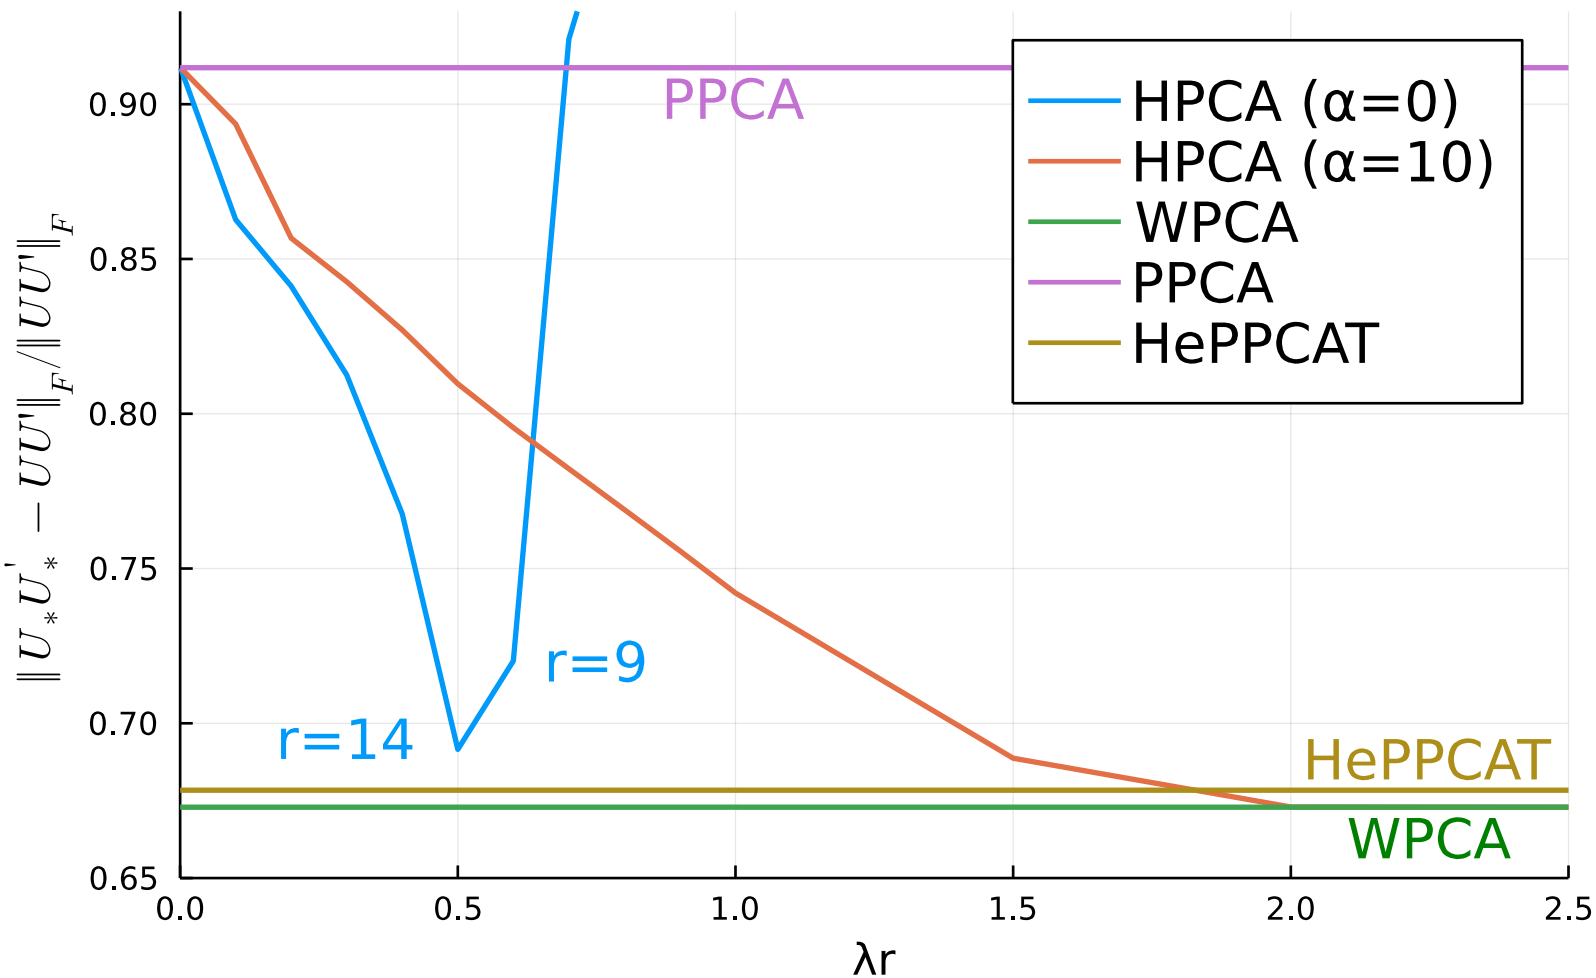

Supplement: supplementary_material [file attachment]

10 trials, uniform data,  $v$  known

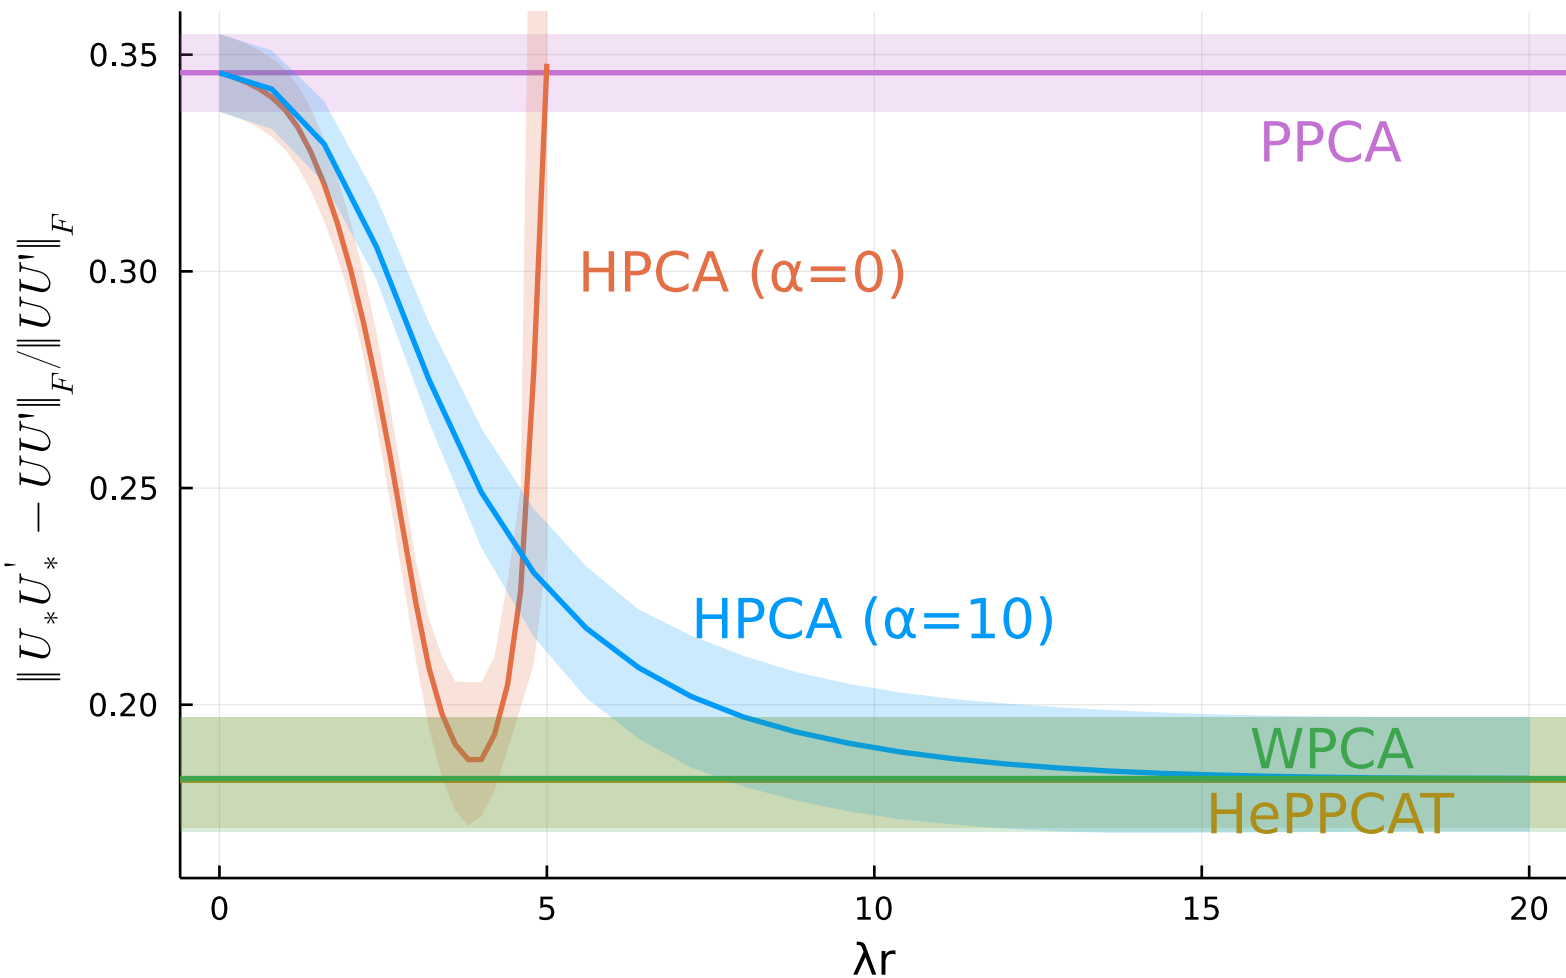

Supplement: supplementary_material [file attachment]

# Noise Variance Estimate (no groups)

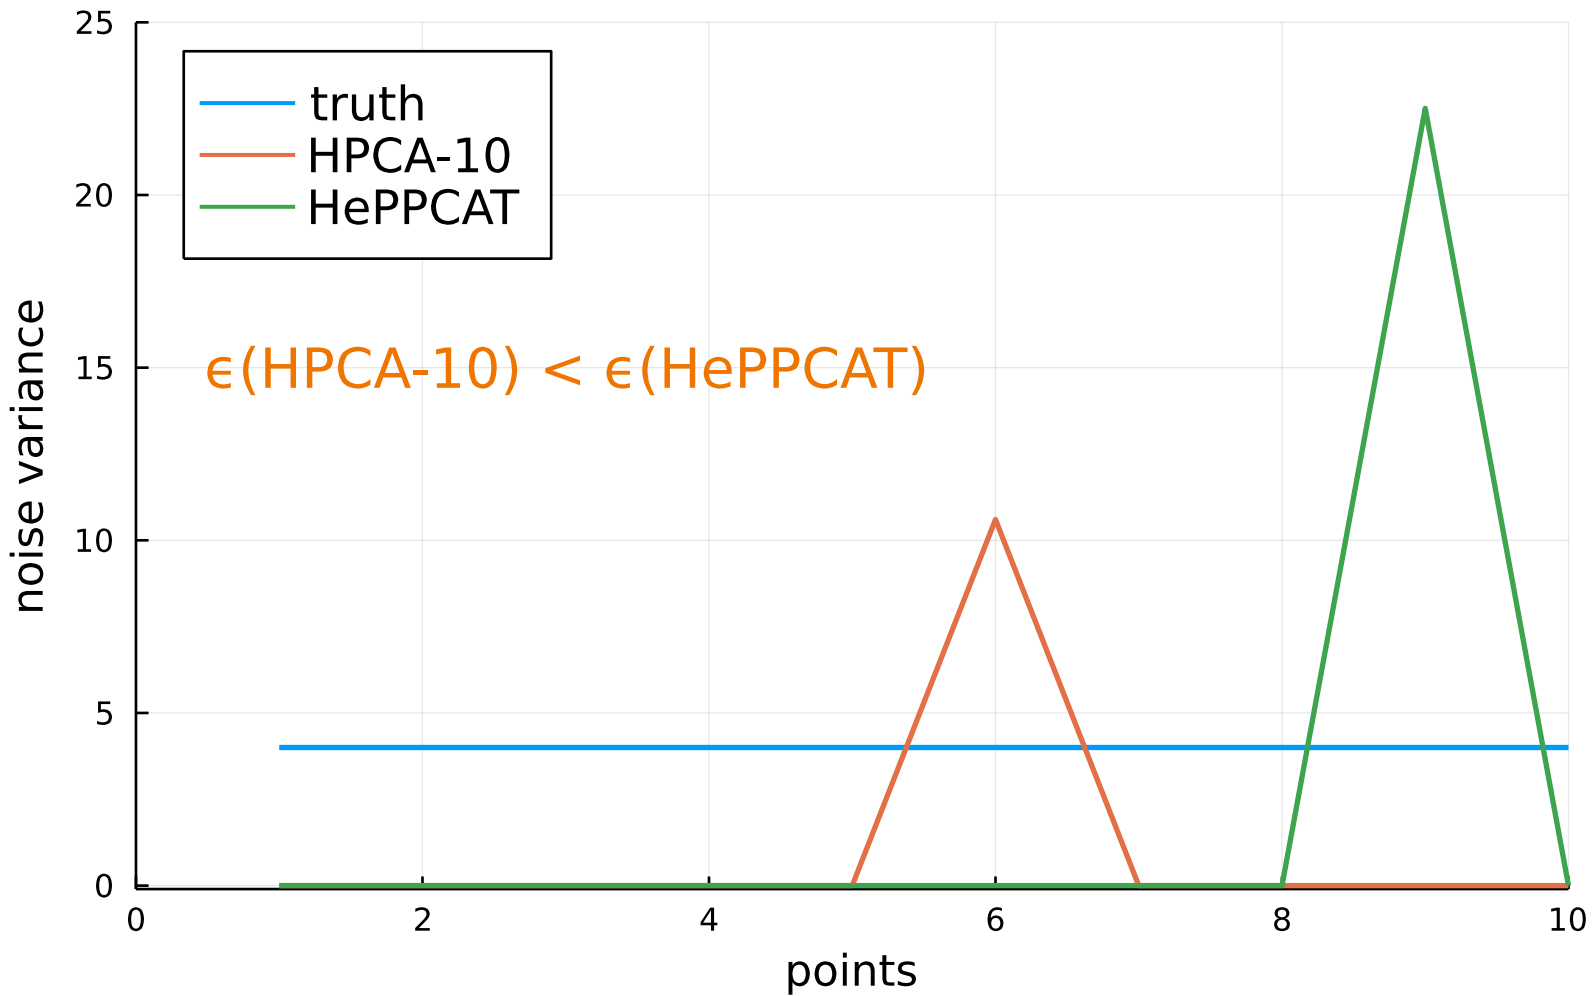

Supplement: supplementary_material [file attachment]

# HPCA ( $v$ unknown, no groups, good points $<$ rank)

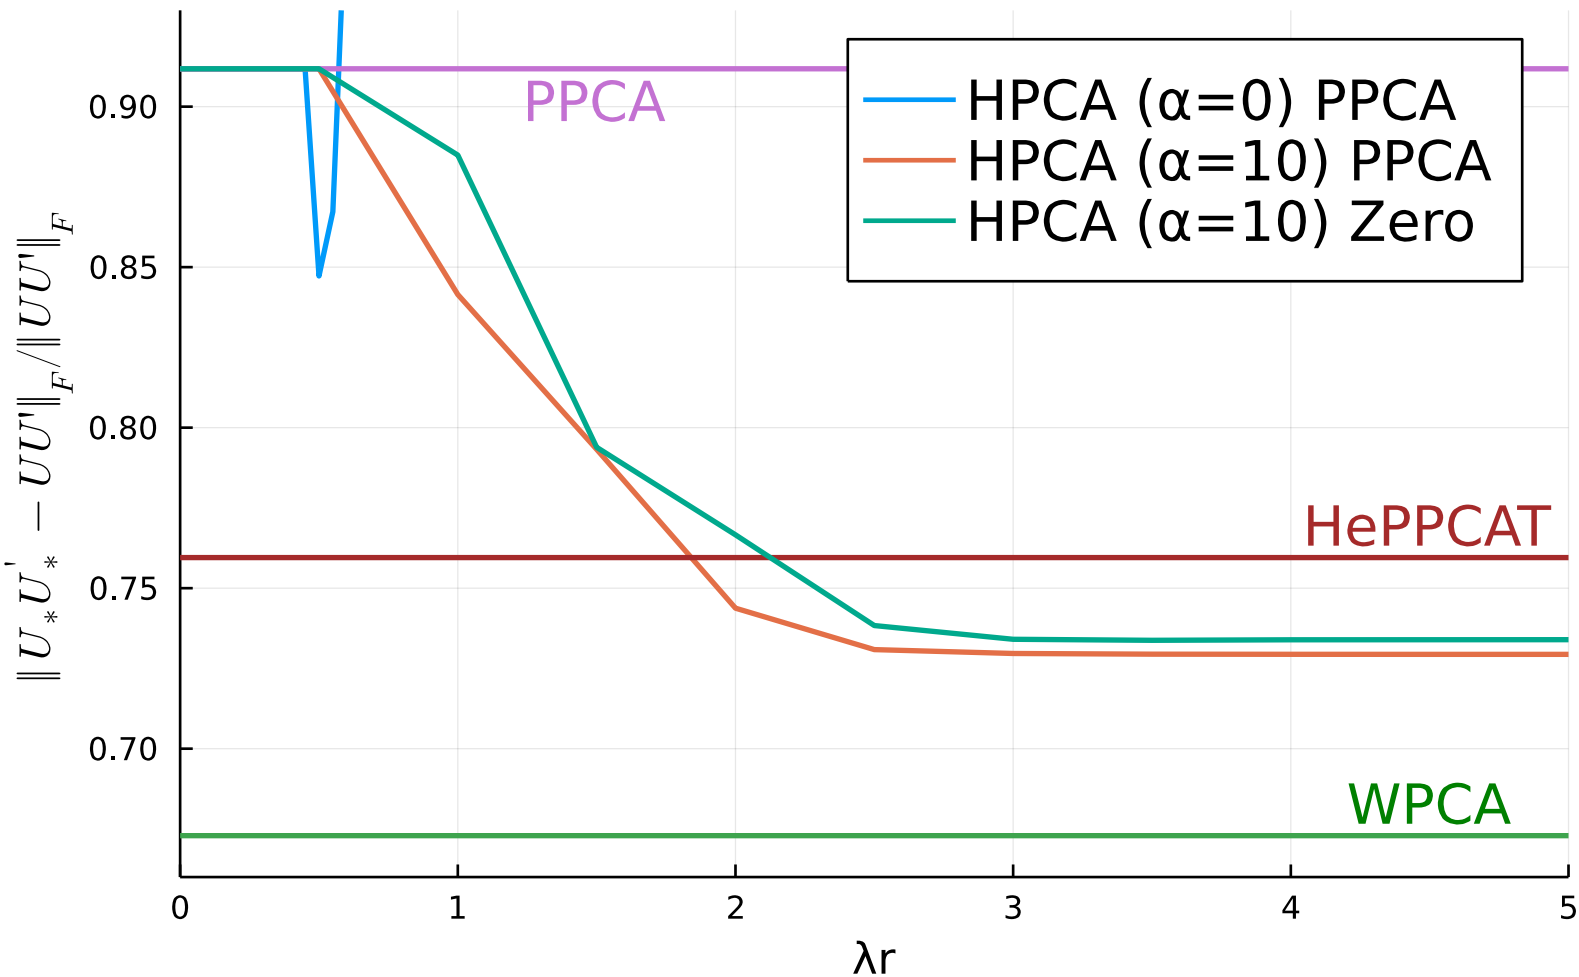

Supplement: supplementary_material [file attachment]

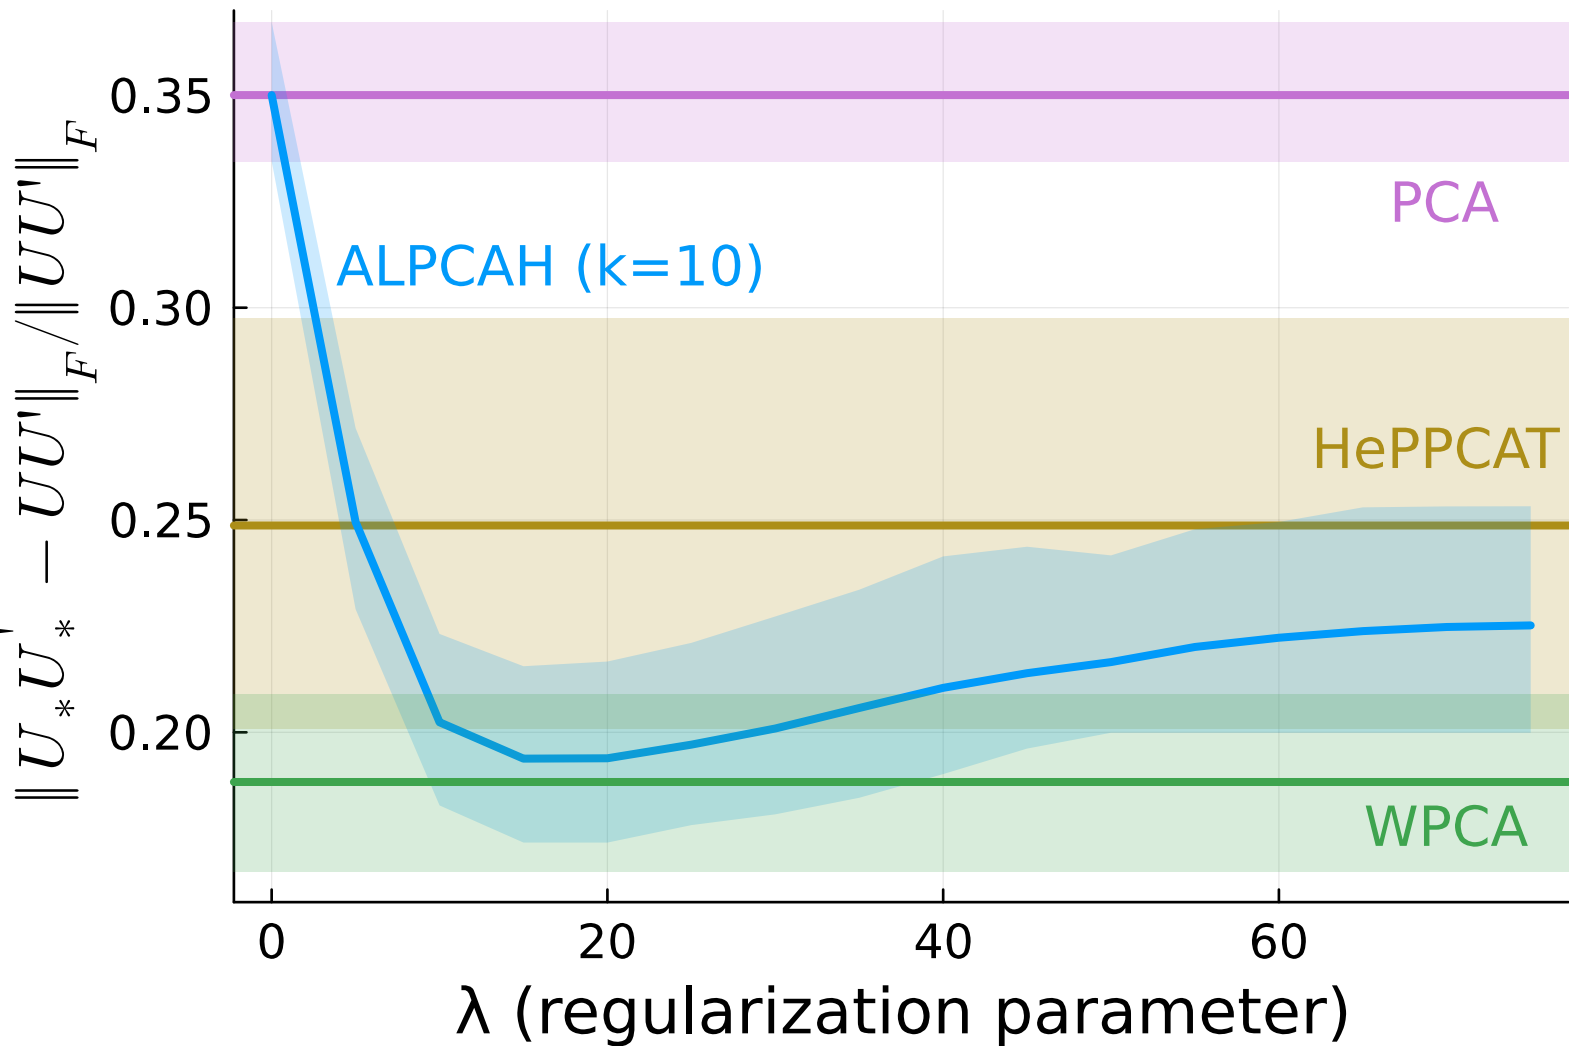

Supplement: supplementary_material [file attachment]

10 trials, gaussian data,  $v$  known

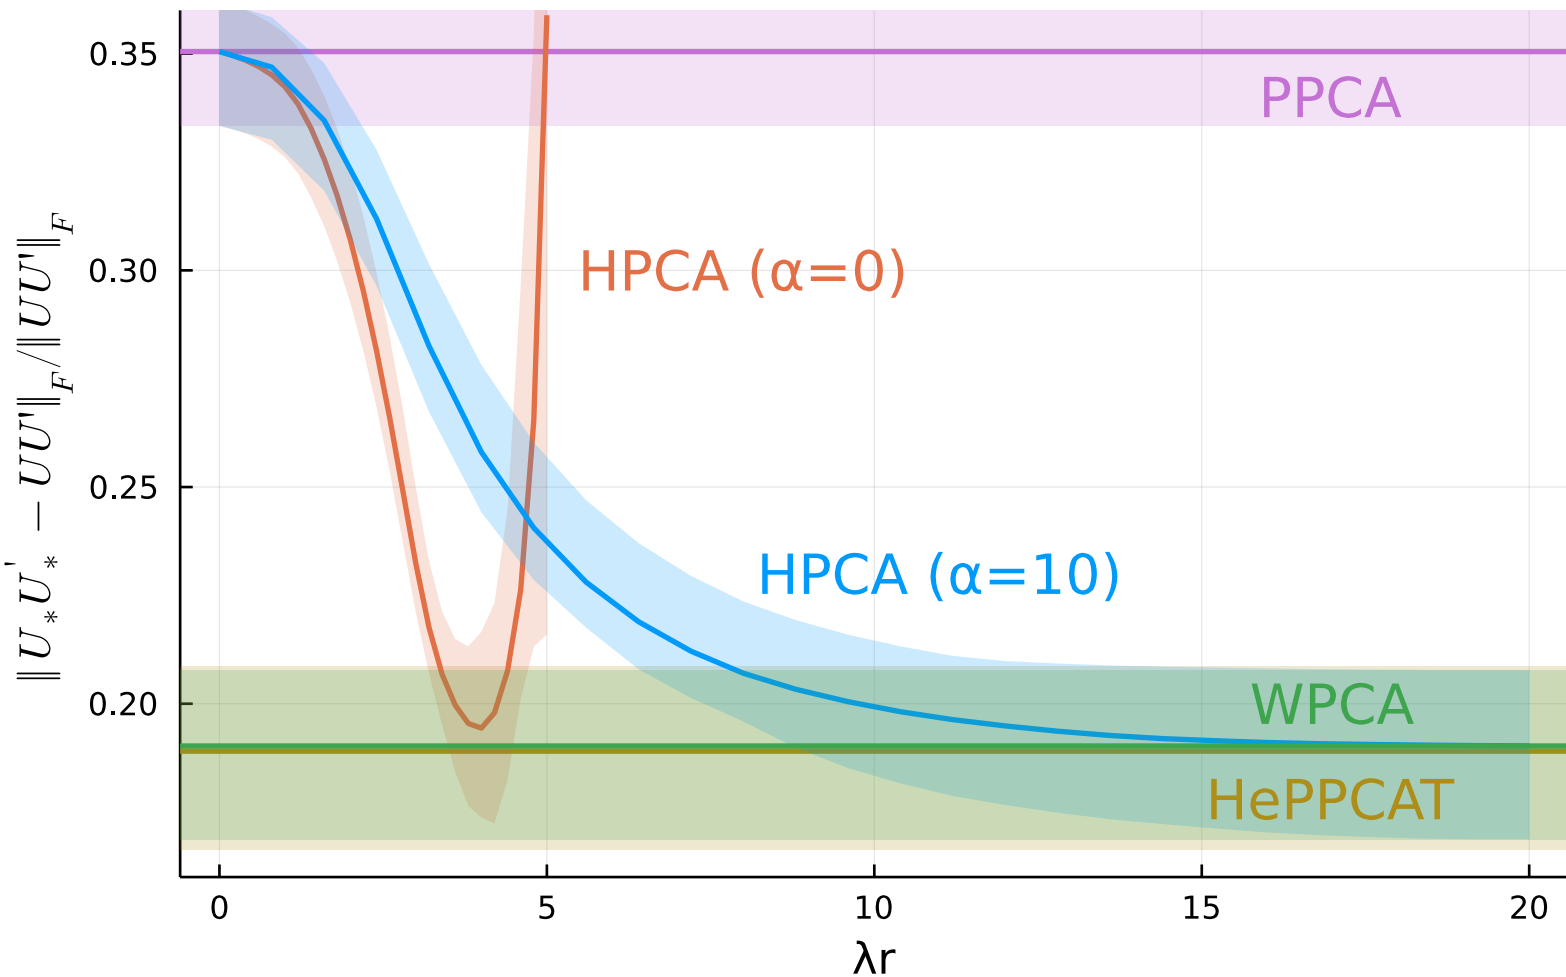

Supplement: supplementary_material [file attachment]

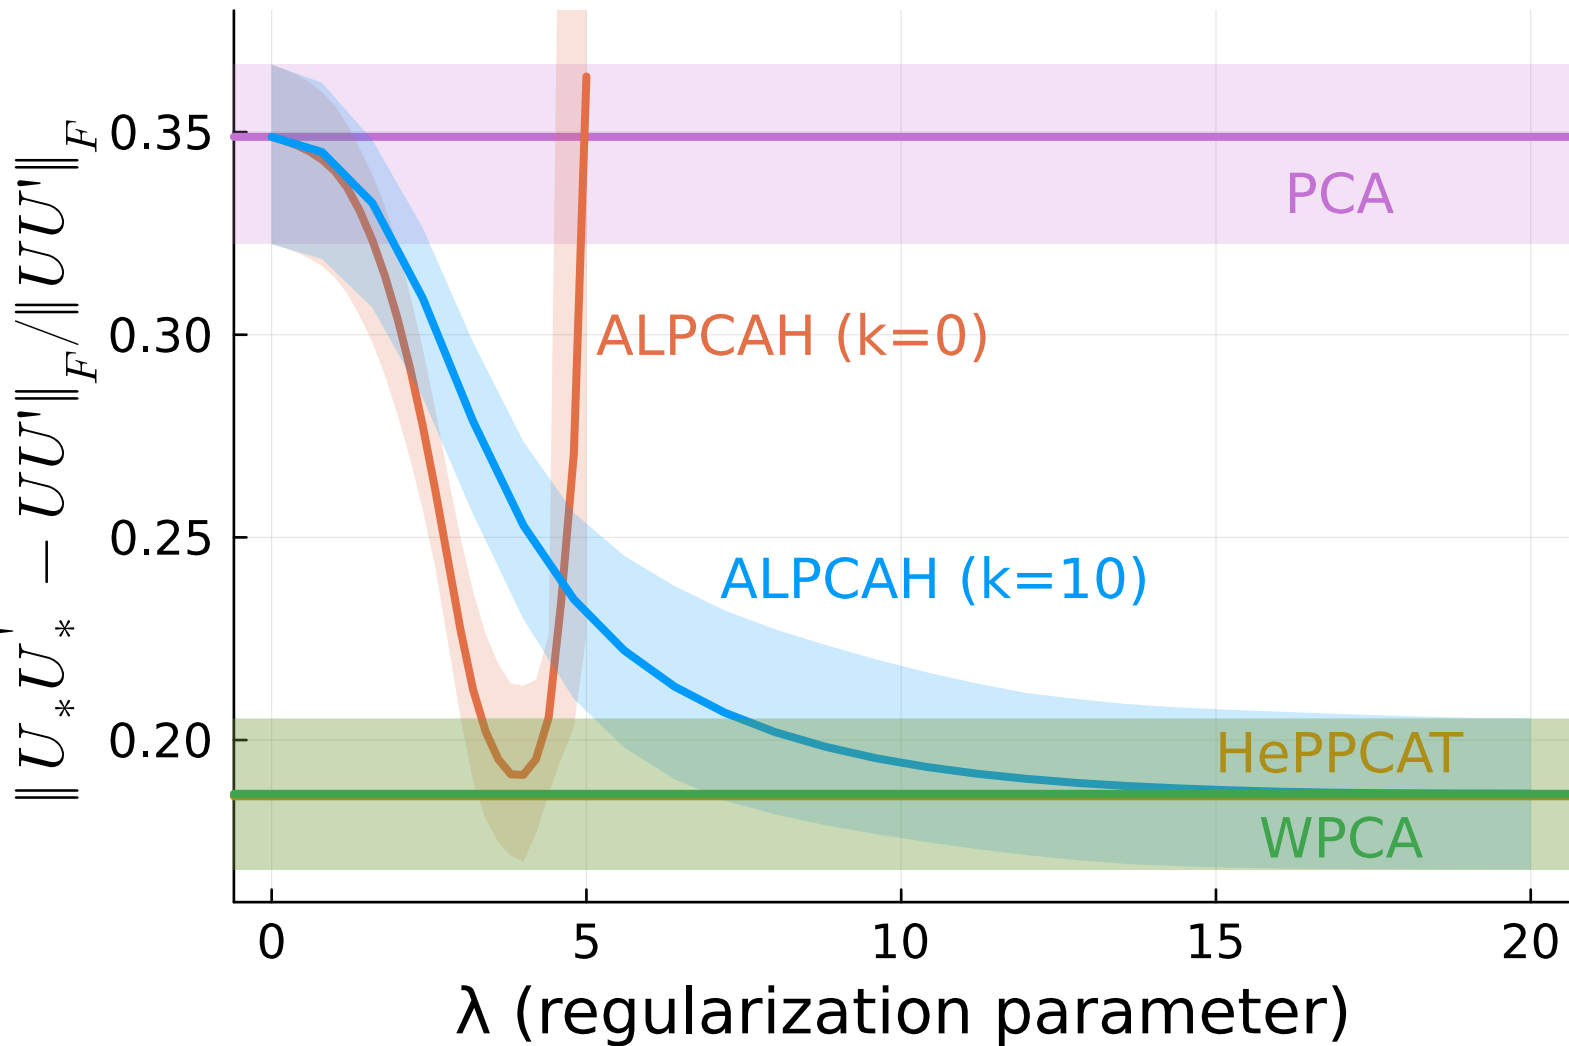

Supplement: supplementary_material [file attachment]

# HPCA (v unknown, no groups, good points = rank)

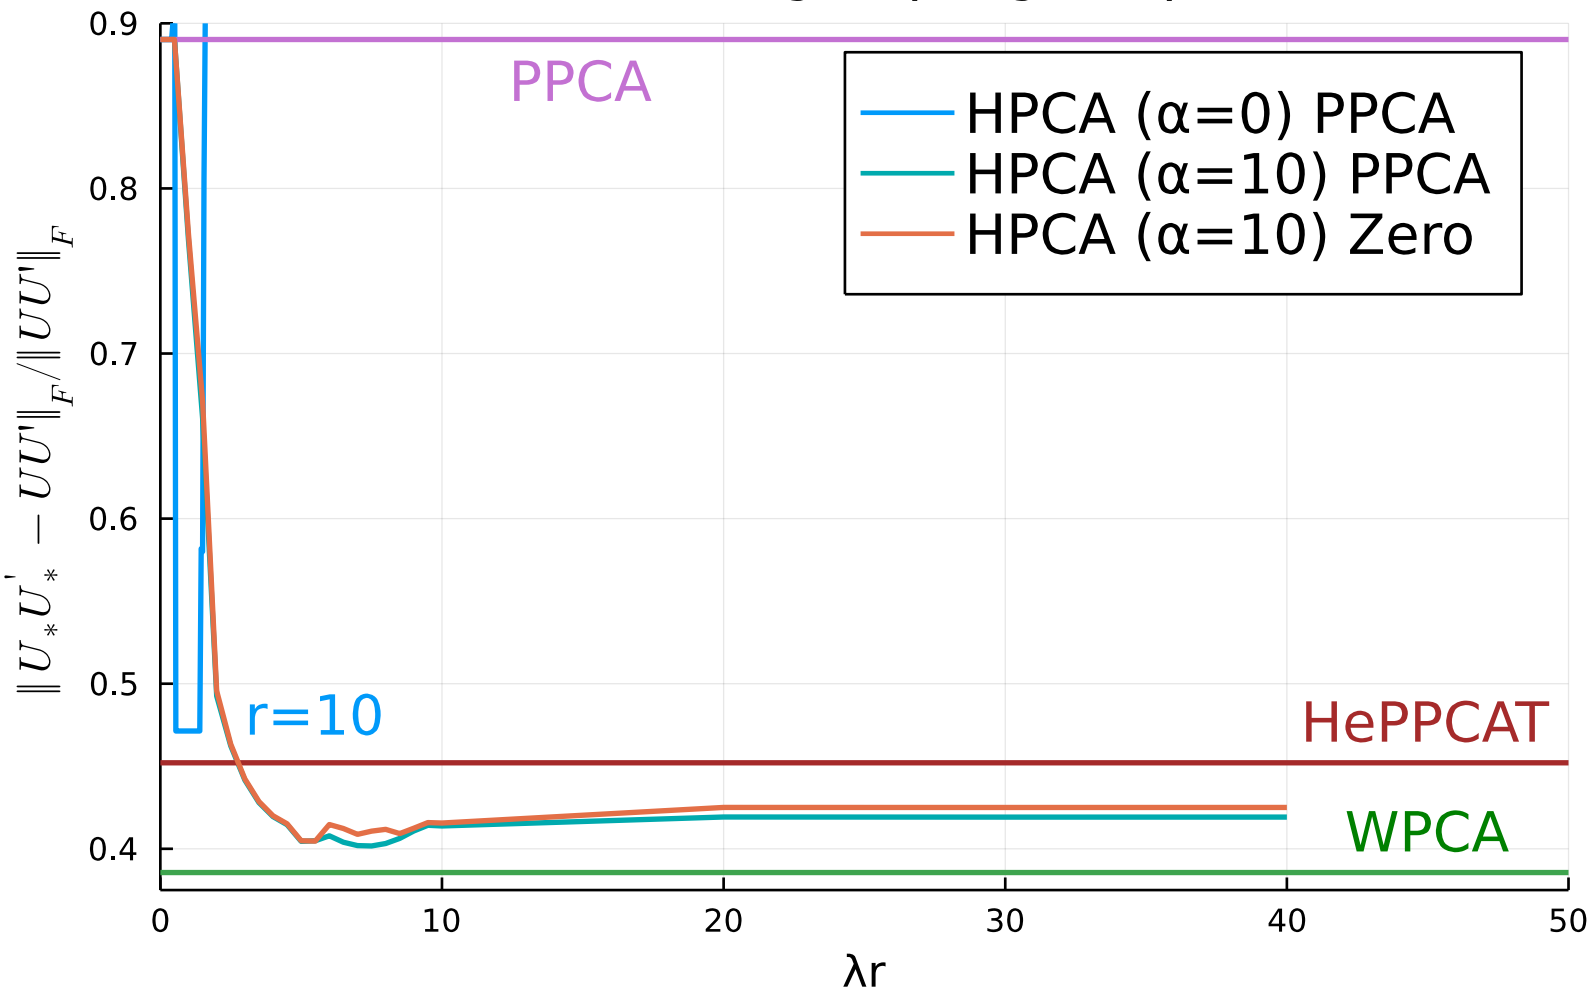

Supplement: supplementary_material [file attachment]

10 trials, gaussian data, no groups, goodpts = rank

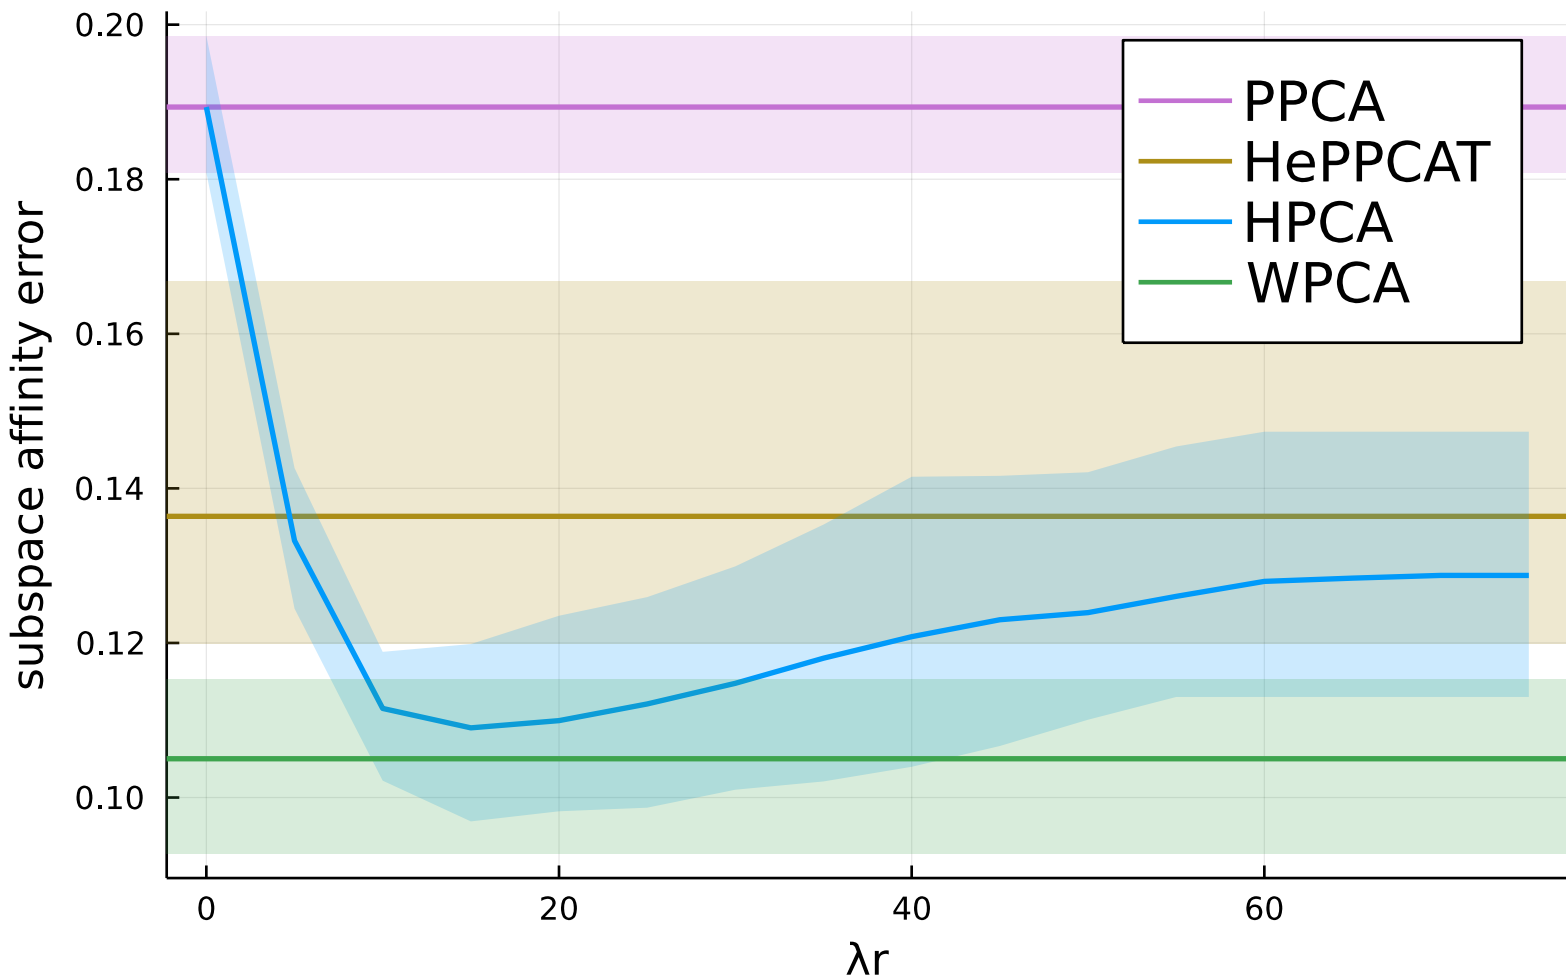

Supplement: supplementary_material [file attachment]

# Noise Variance Estimate (groups)

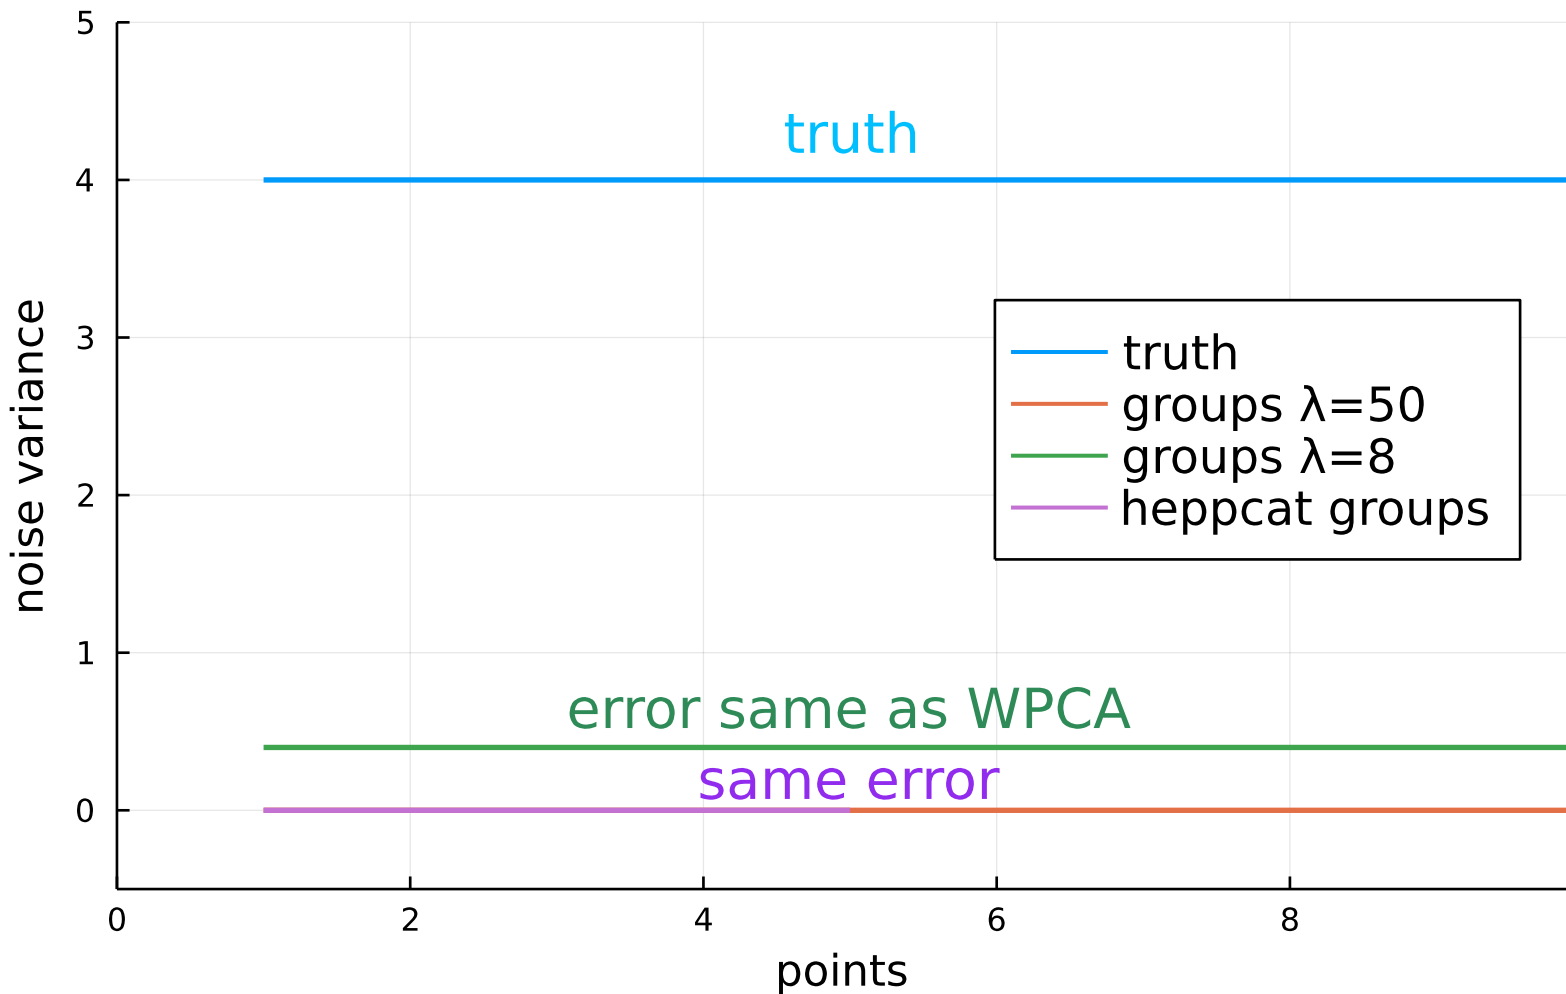

Supplement: supplementary_material [file attachment]

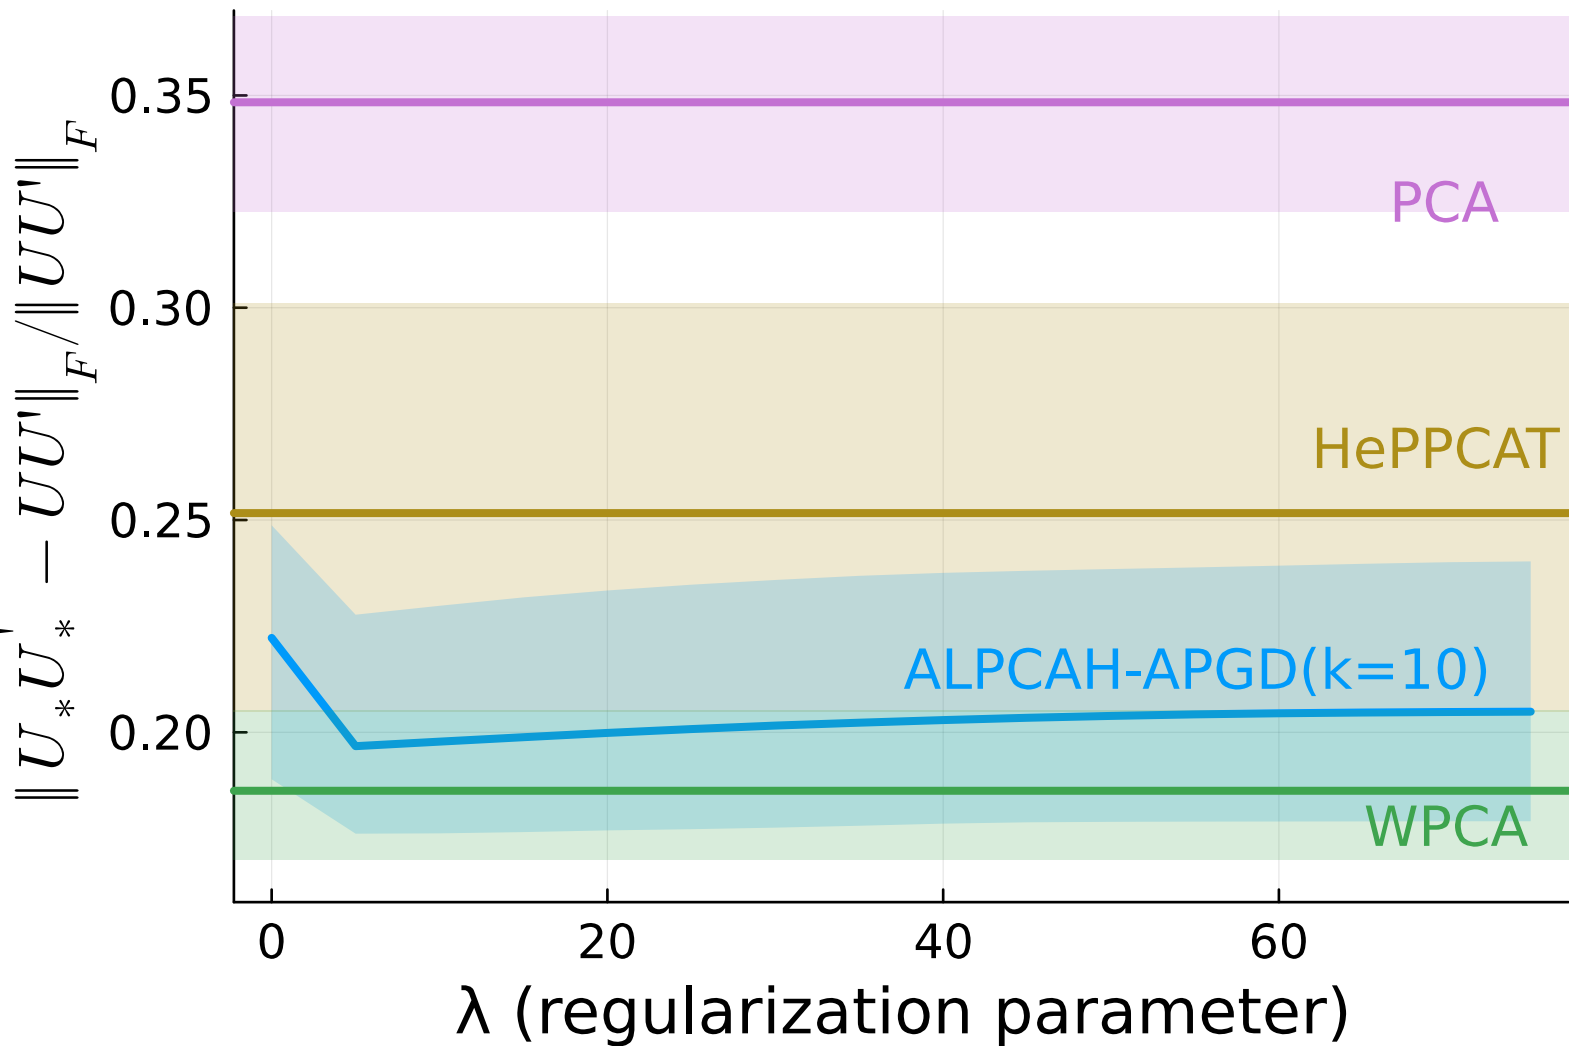

Supplement: supplementary_material [file attachment]

# HPCA Rank Knowledge (no groups, ppca init.)

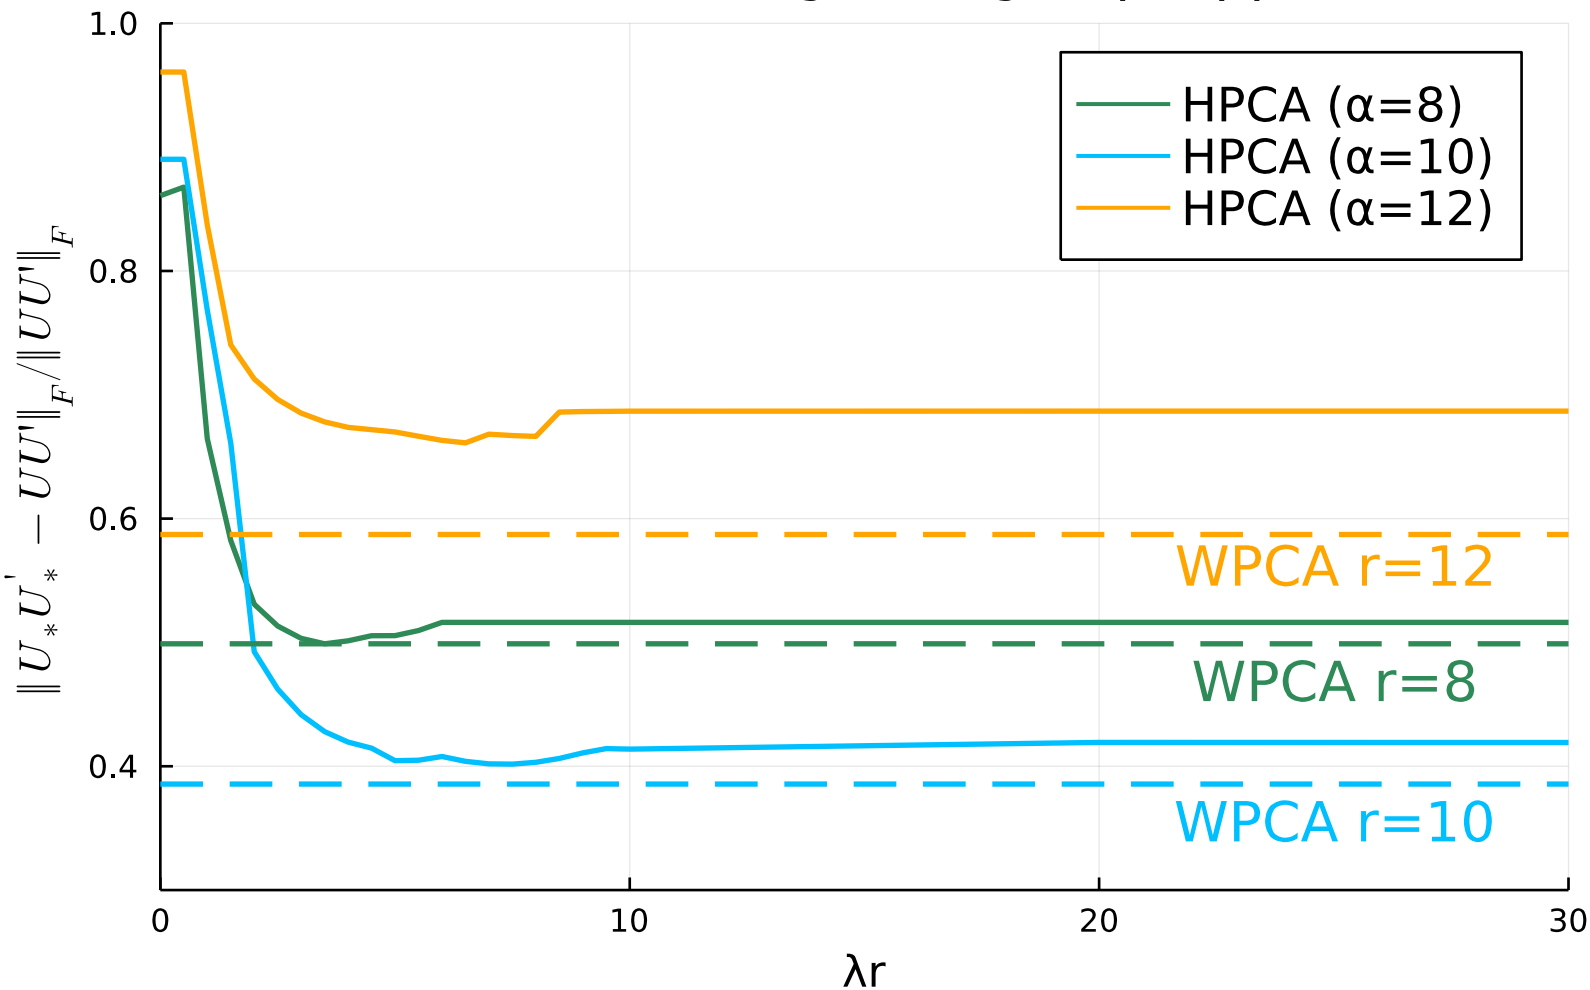

Supplement: supplementary_material [file attachment]

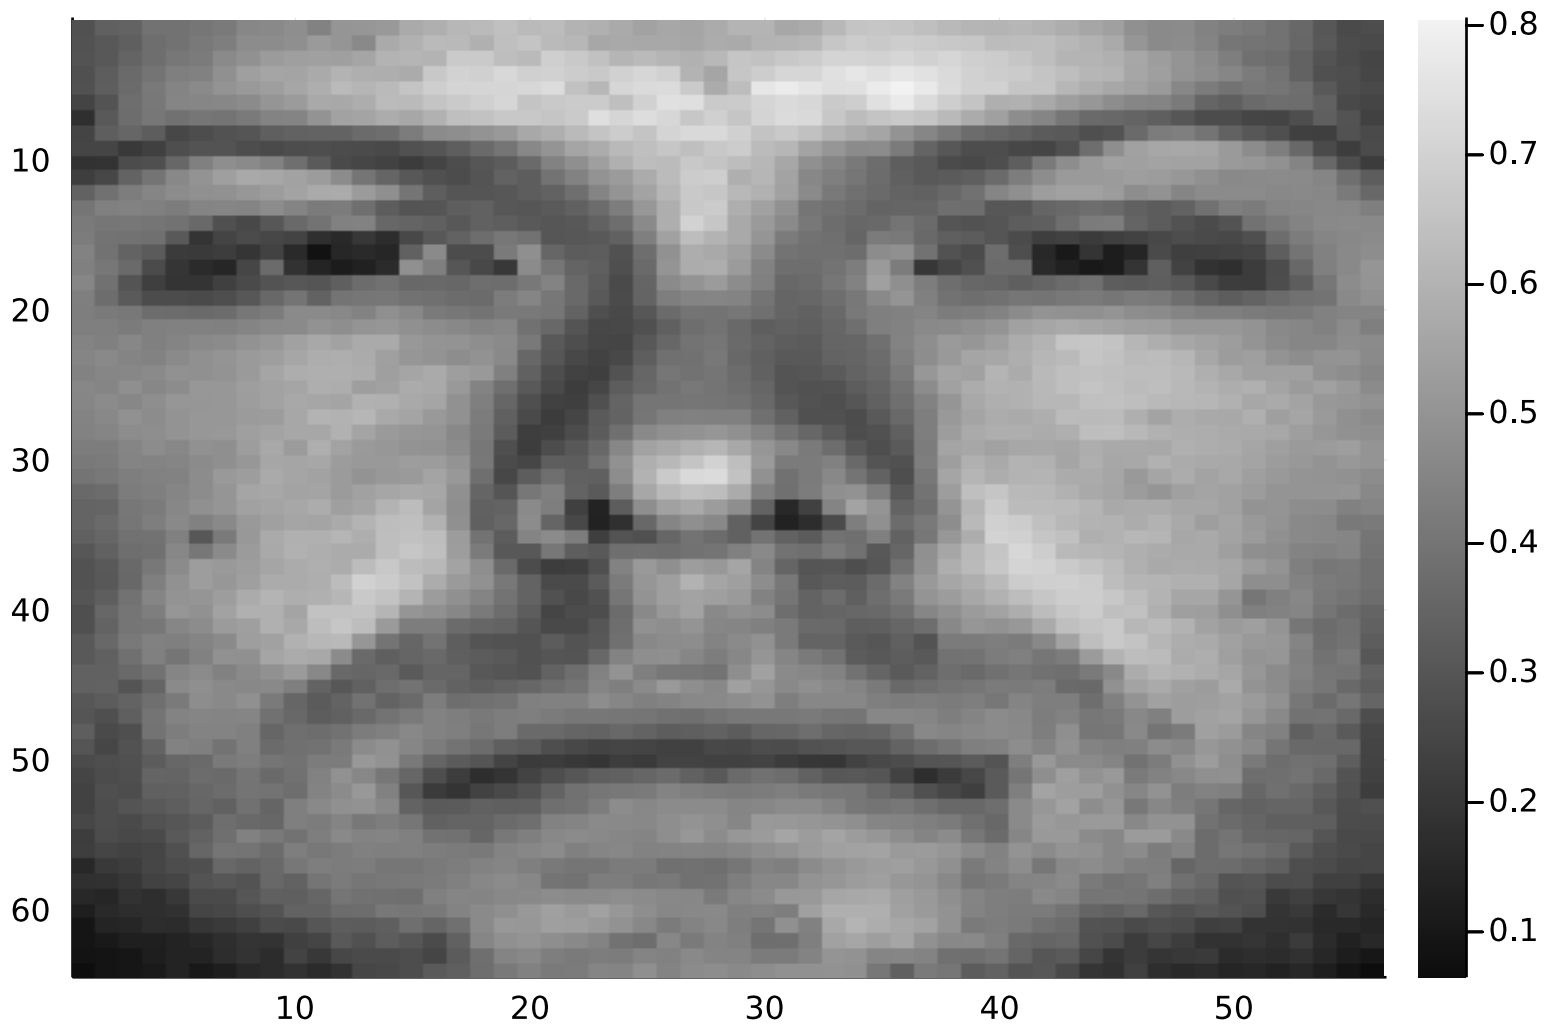

Supplement: supplementary_material [file attachment]

# Noise Variance Estimate (groups)

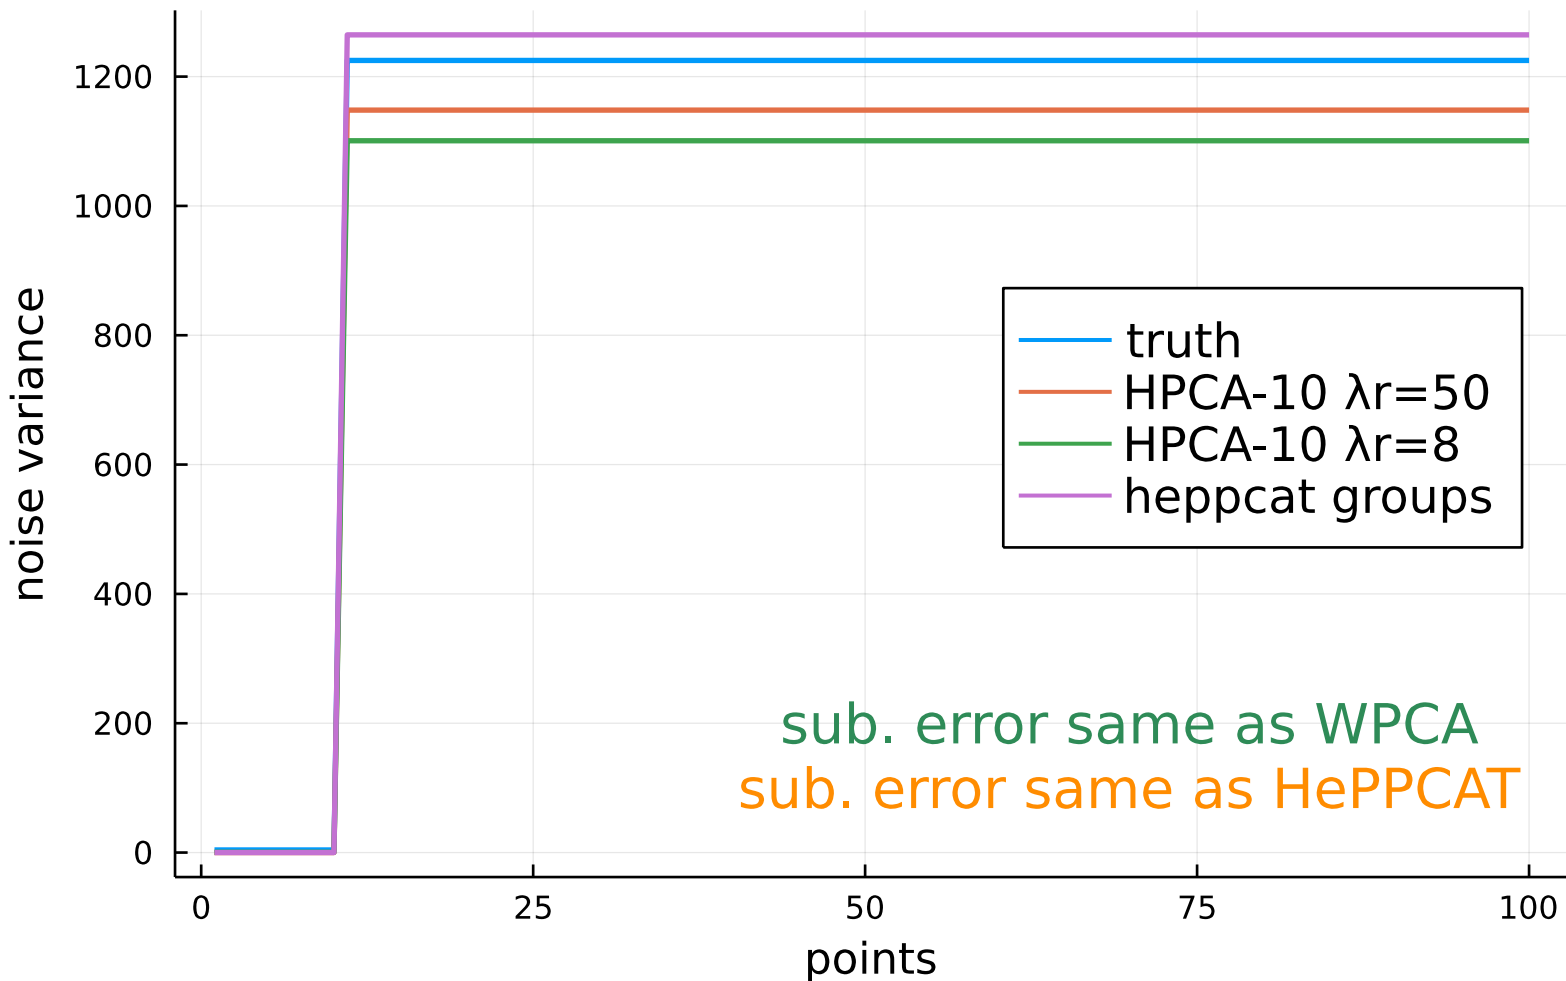

Supplement: supplementary_material [file attachment]

unknown variance case, no group knowledge,  $k = 10$

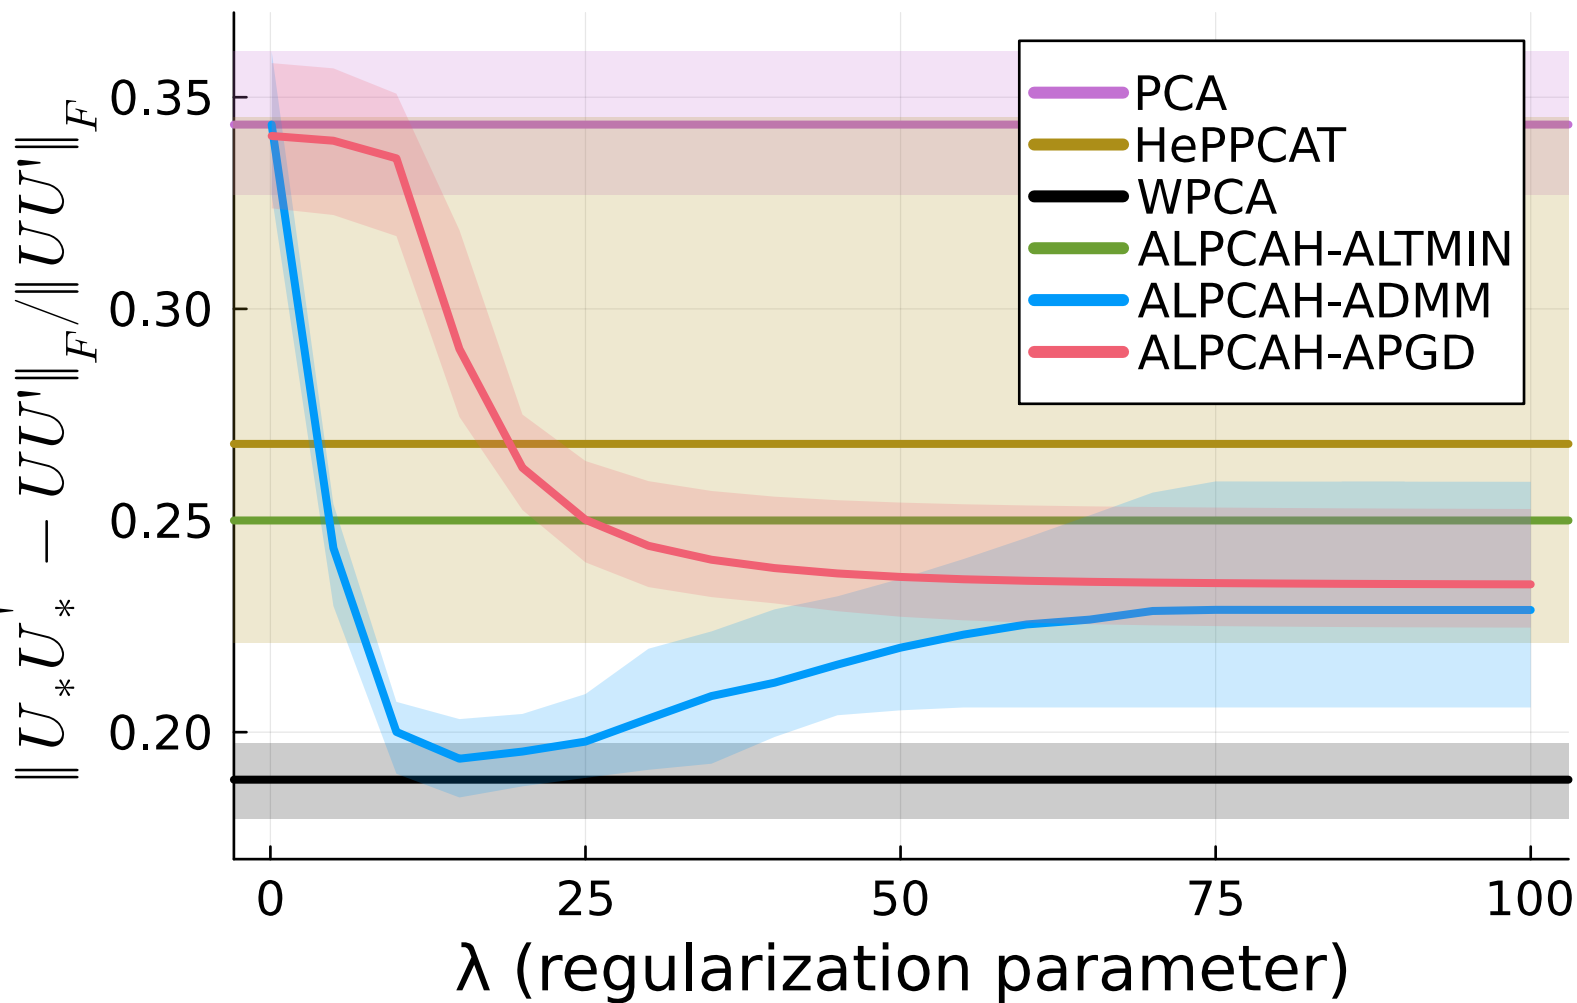

Supplement: supplementary_material [file attachment]

10 trials, uniform data, no groups, goodpts = rank

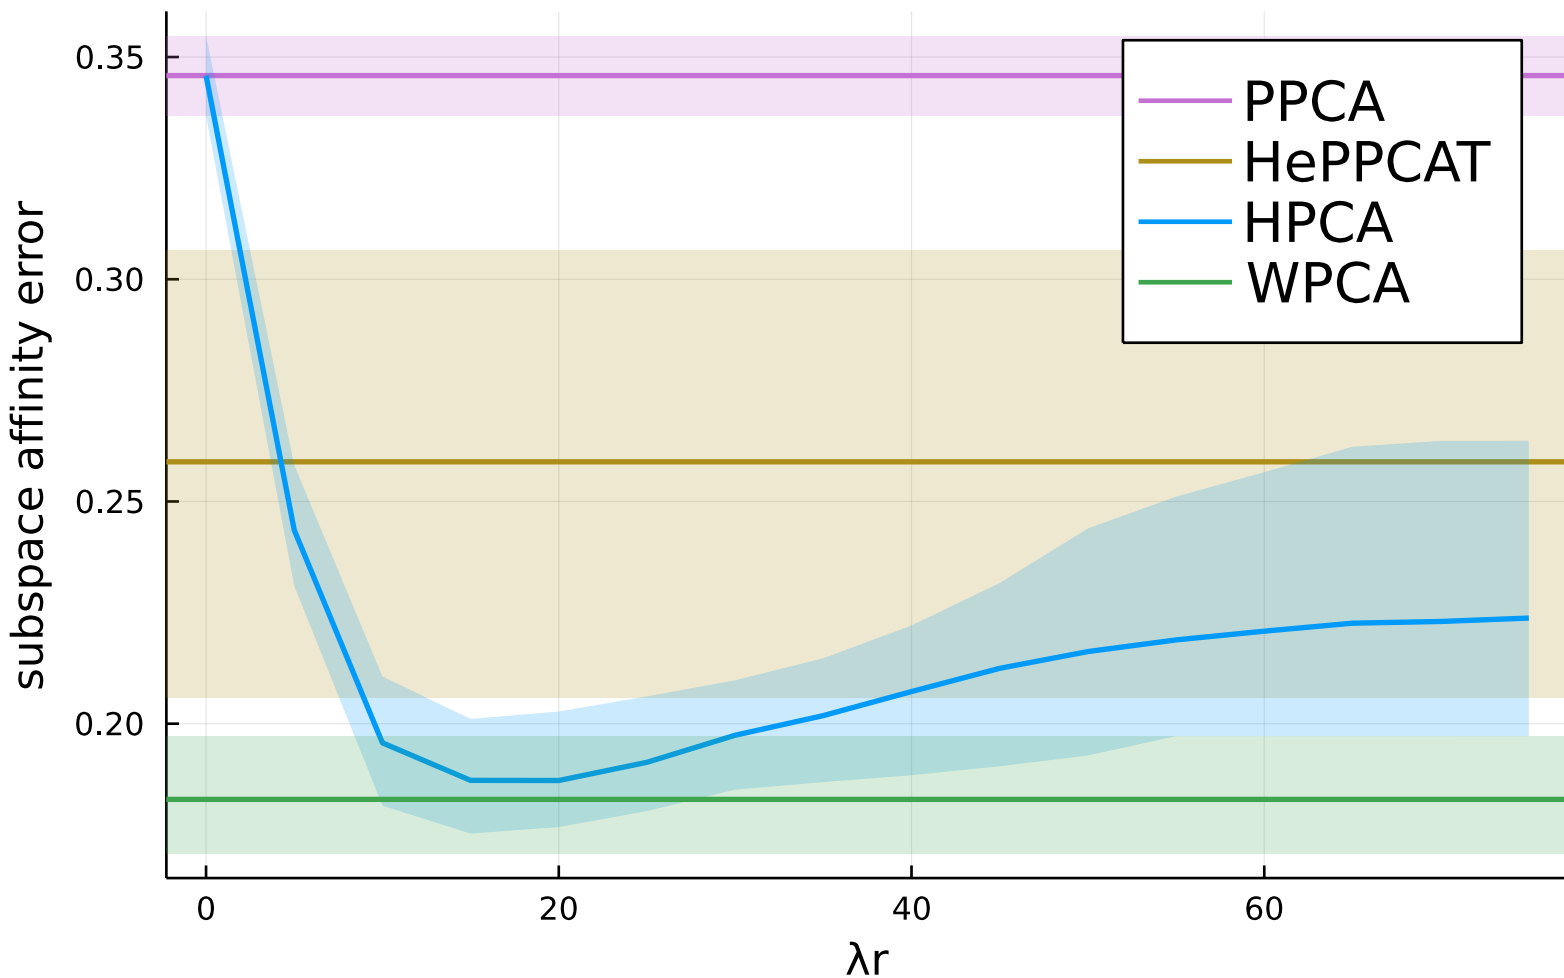

Supplement: supplementary_material [file attachment]

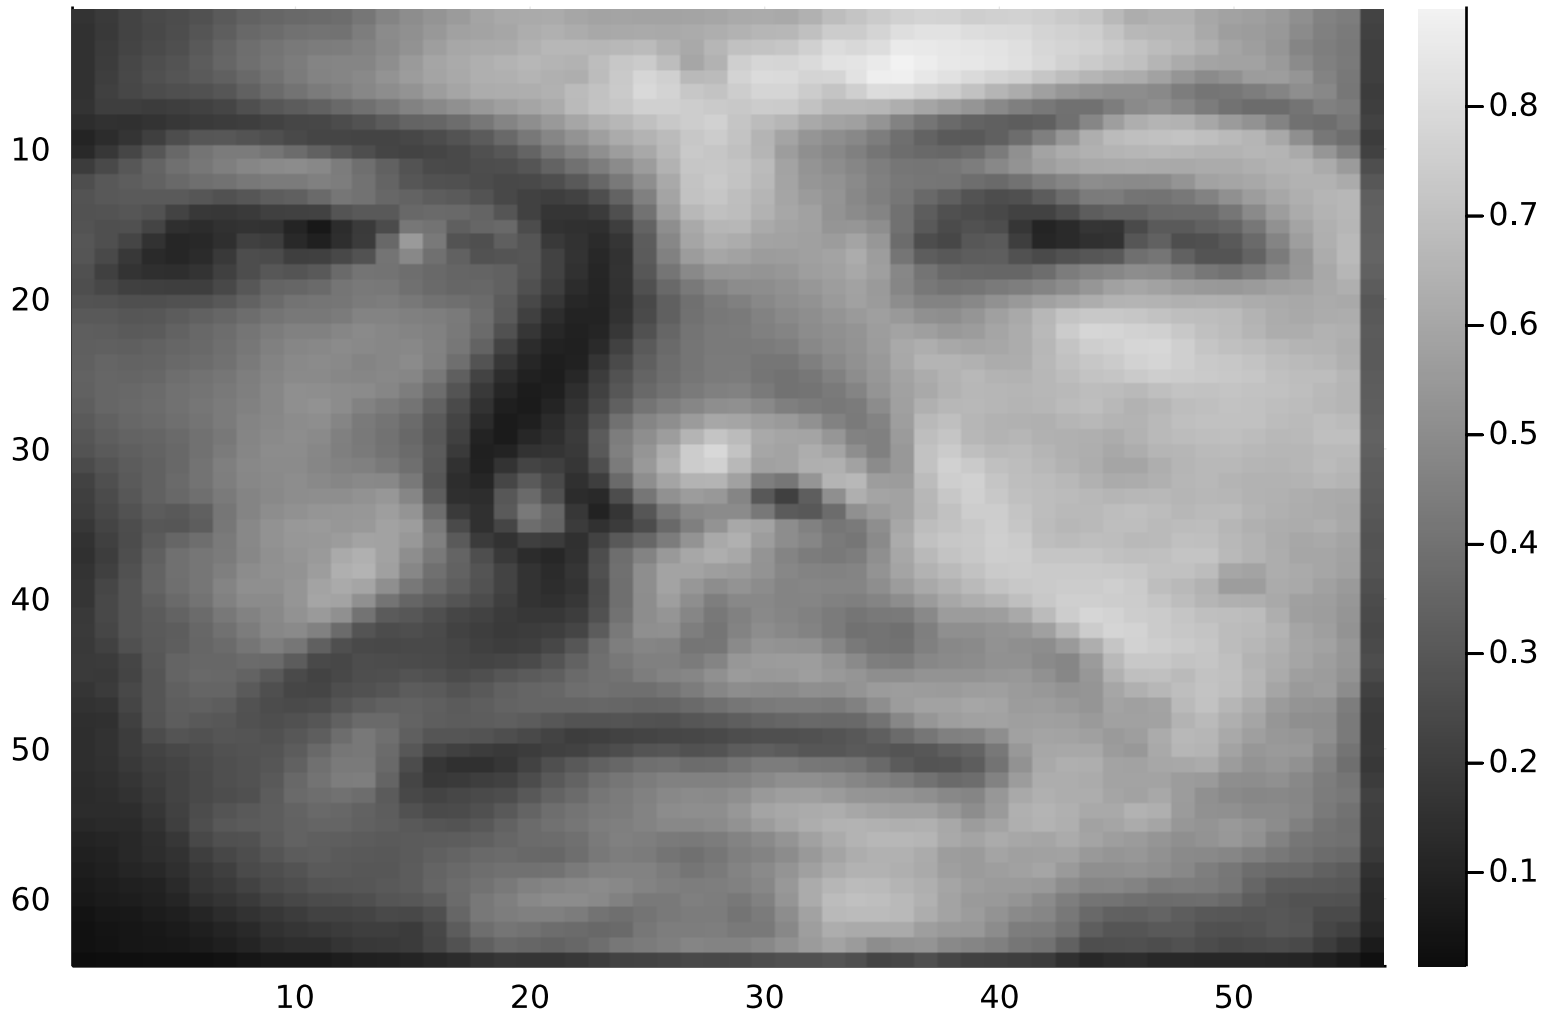

Supplement: supplementary_material [file attachment]

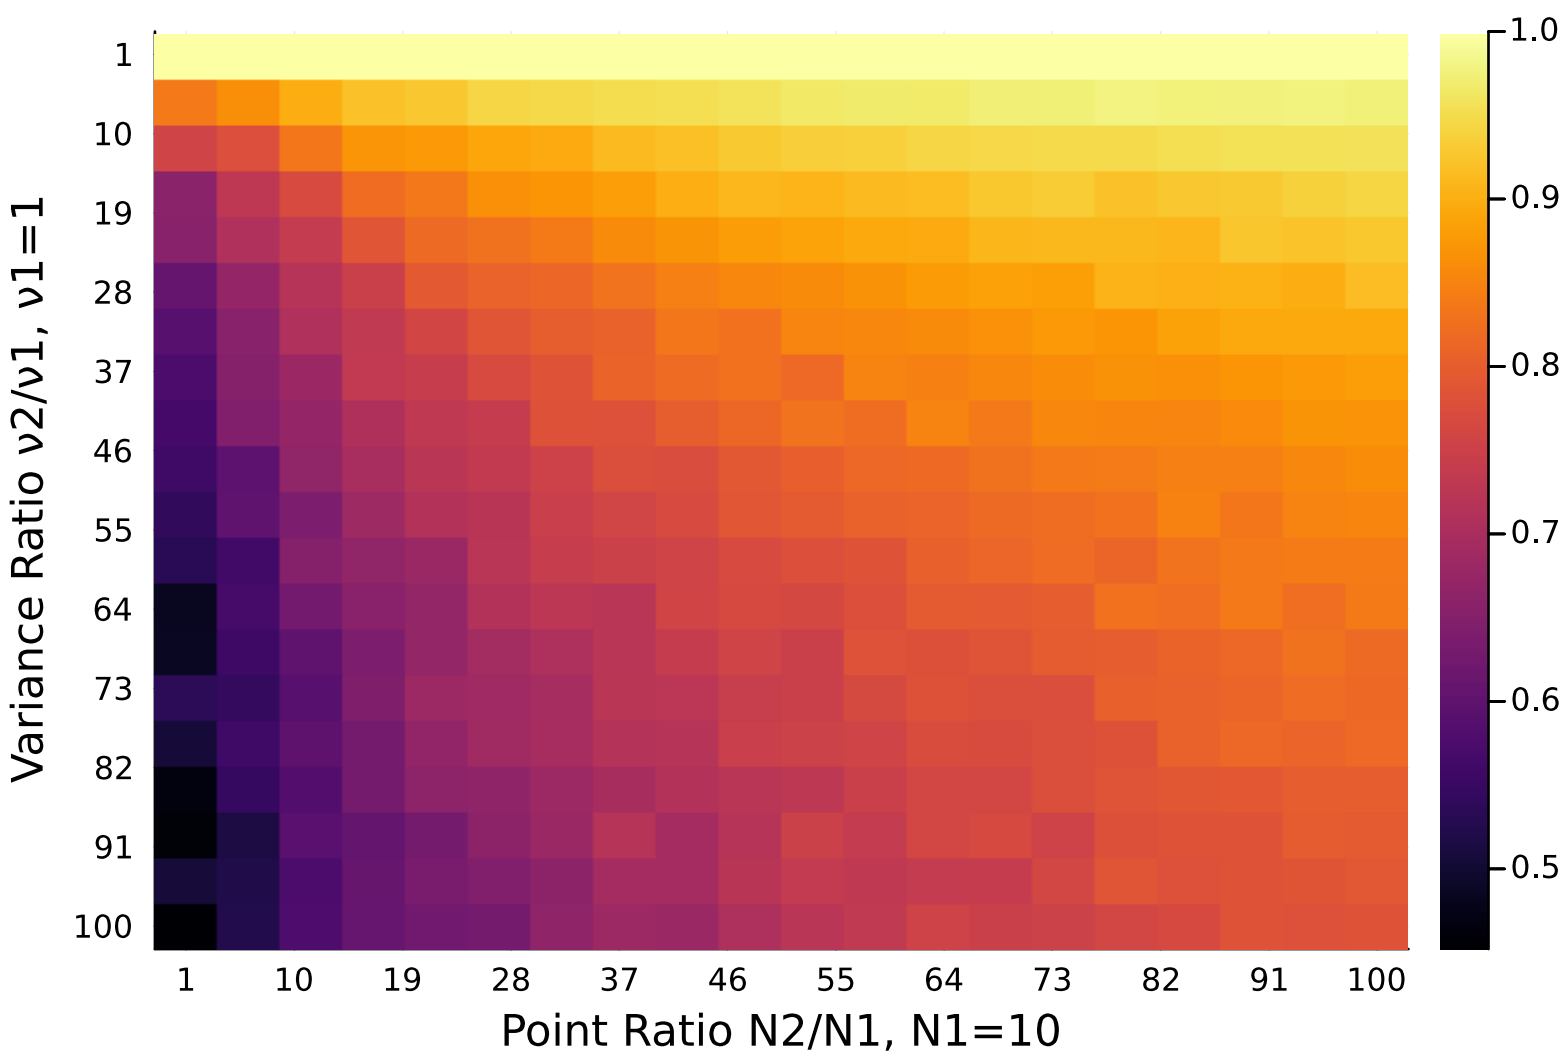

Supplement: supplementary_material [file attachment]

10 trials, gaussian N=500, good features=50/100

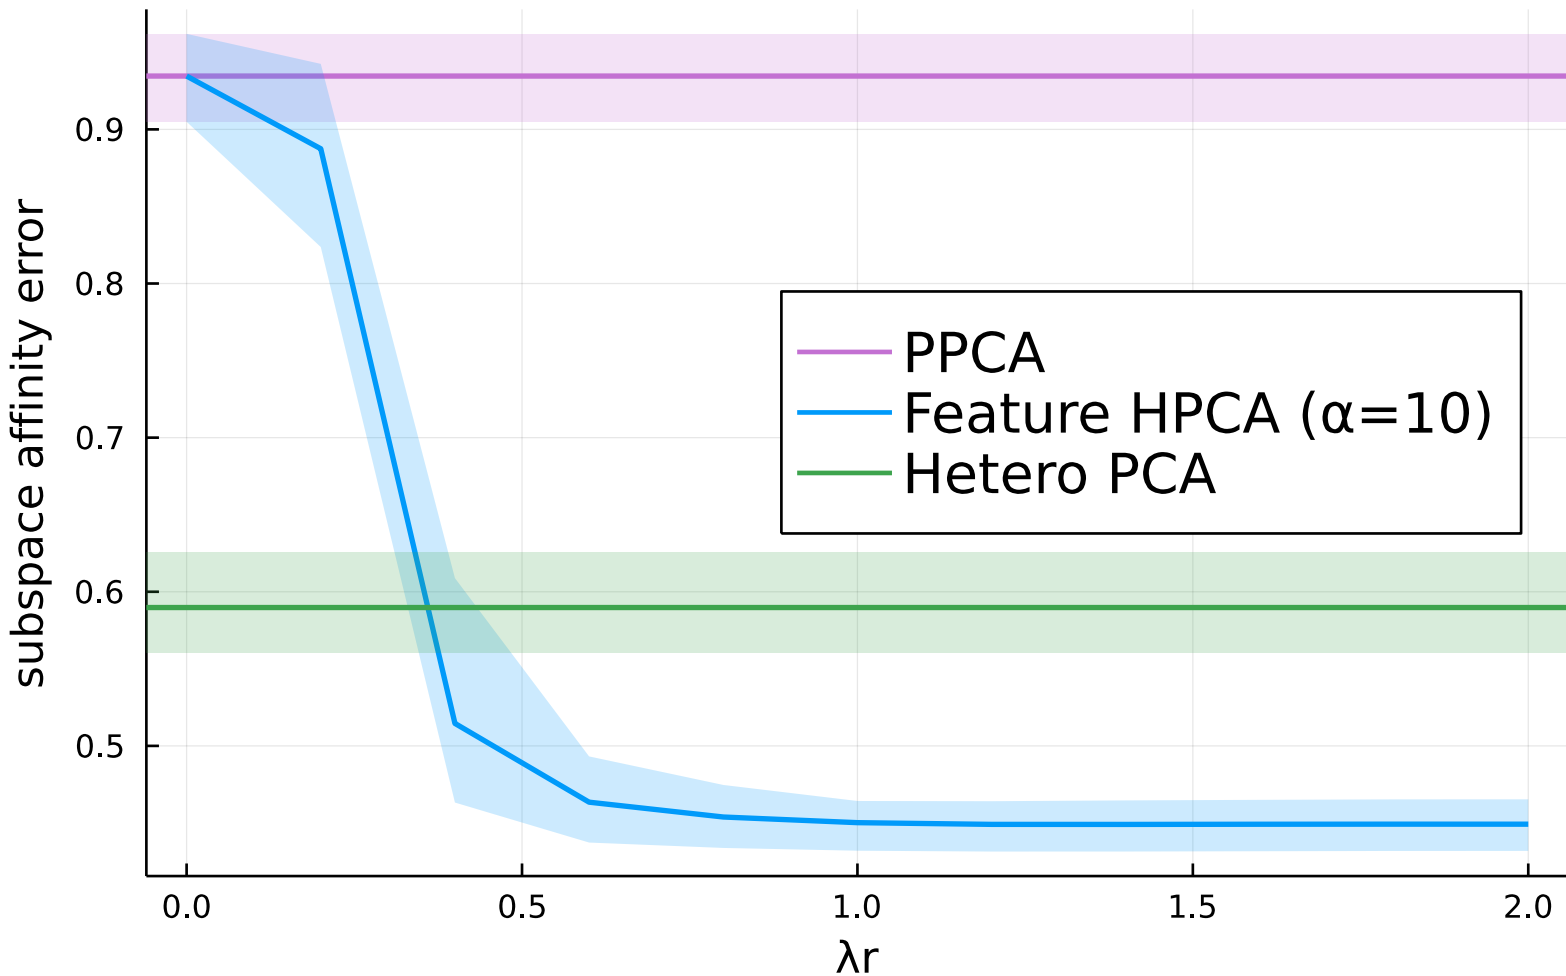

Supplement: supplementary_material [file attachment]

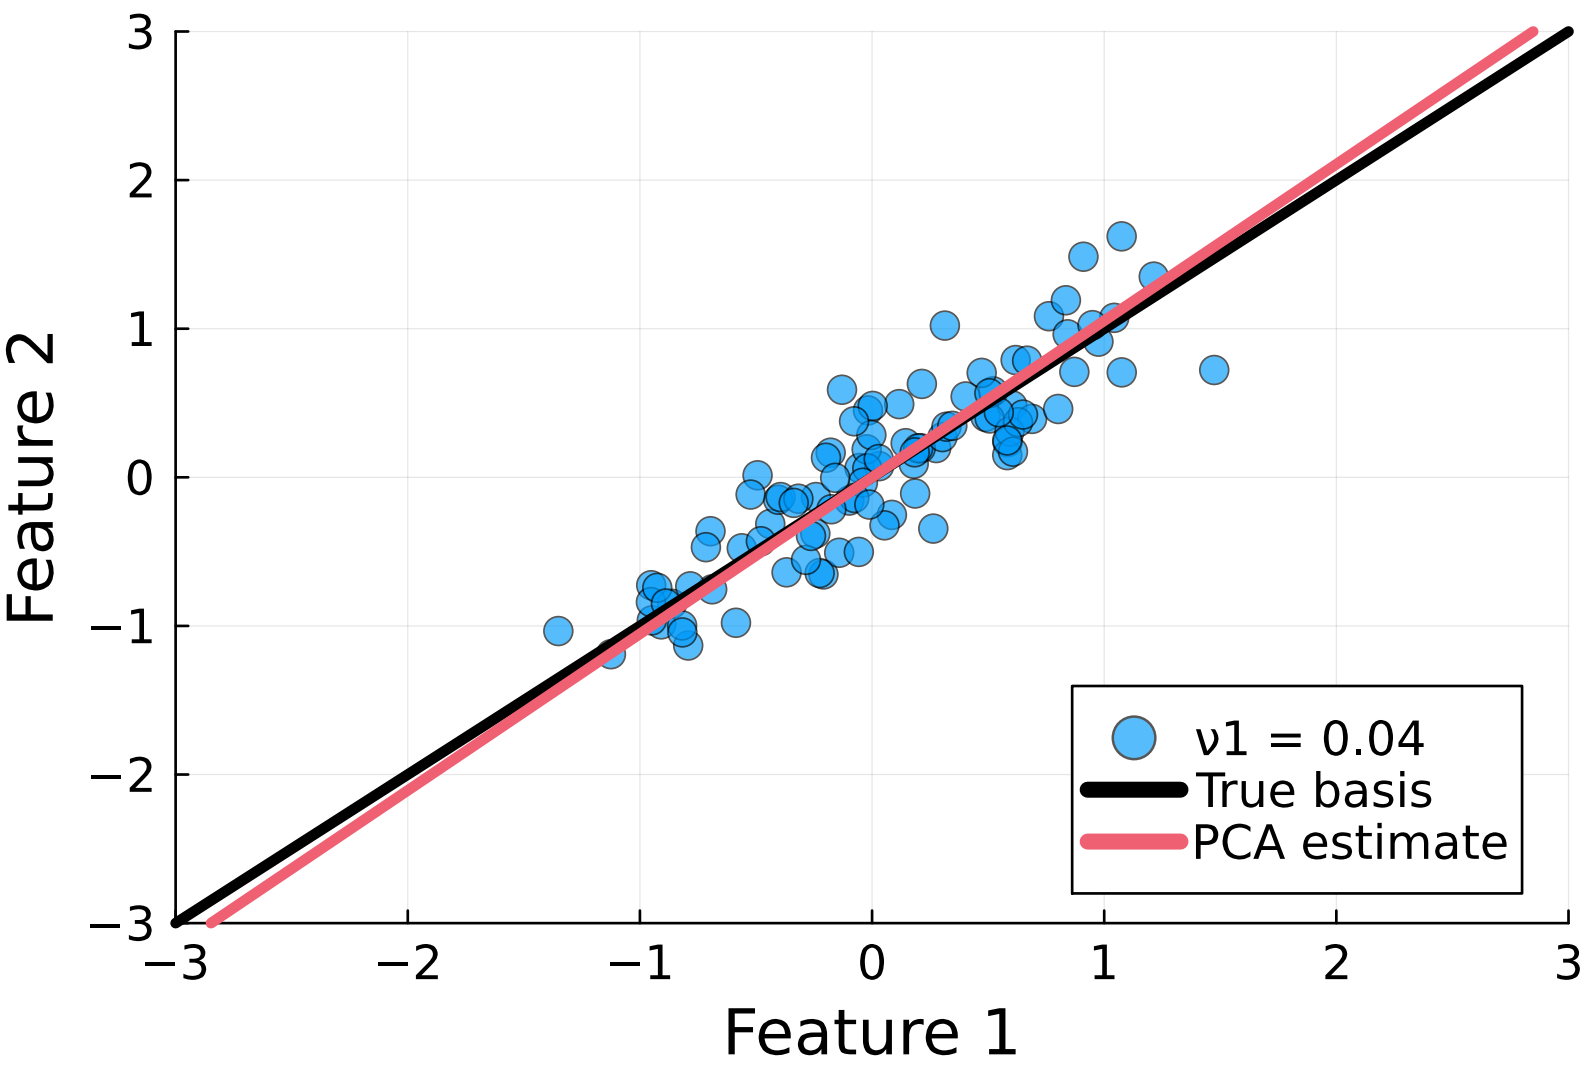

Supplement: supplementary_material [file attachment]

# HPCA (v known, zero init, good points = rank)

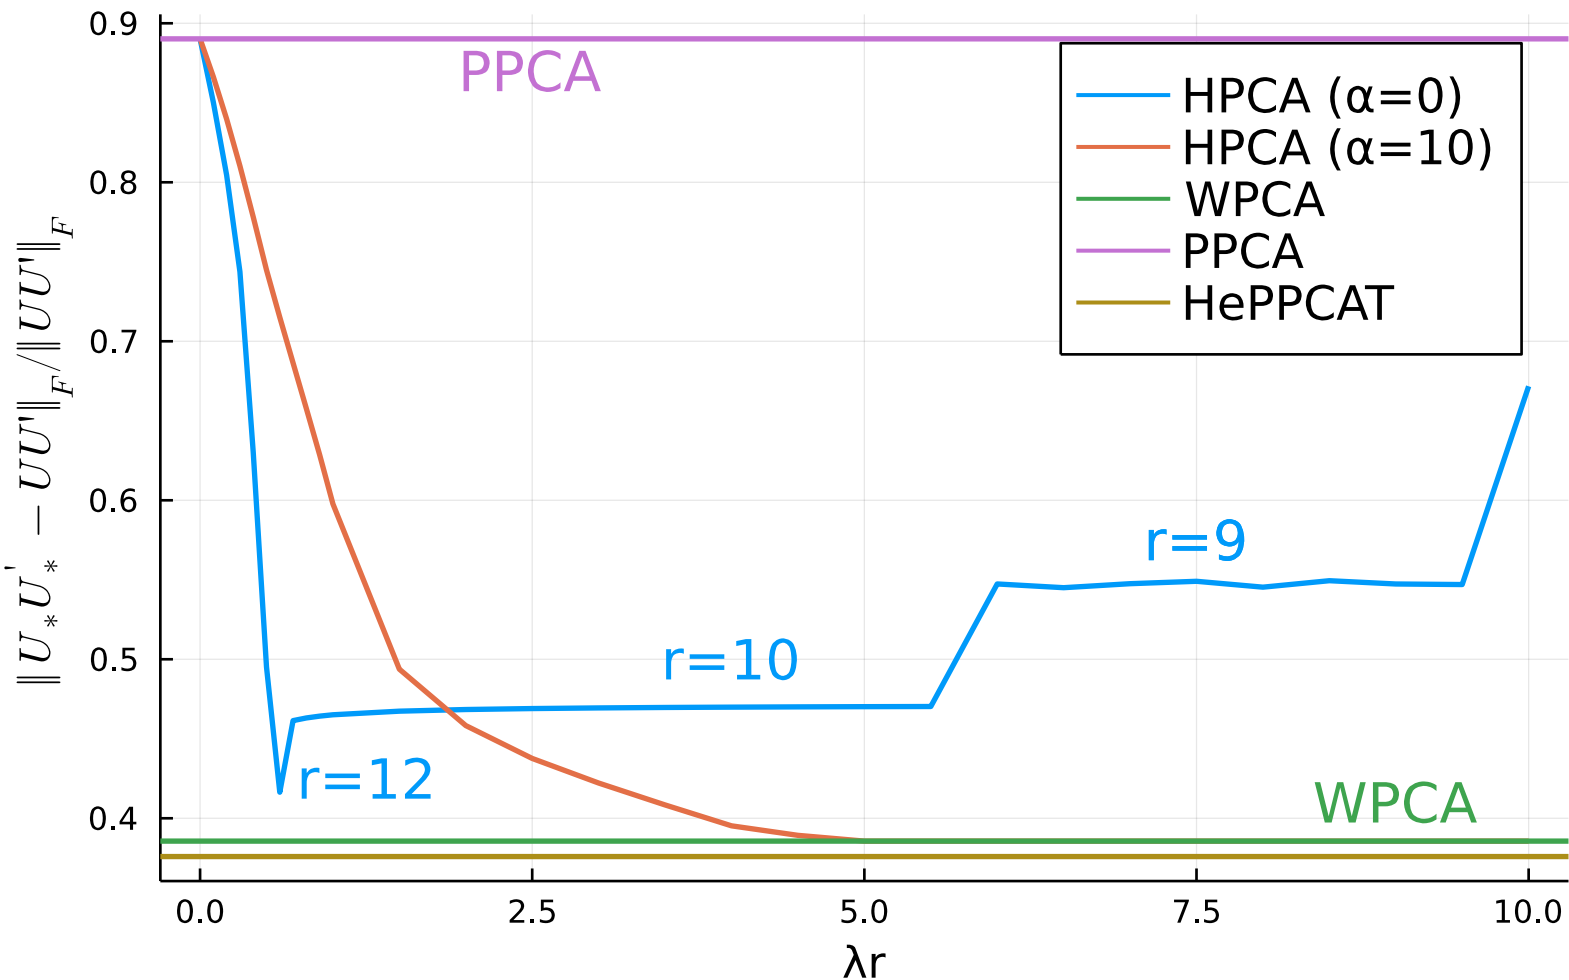

Supplement: supplementary_material [file attachment]

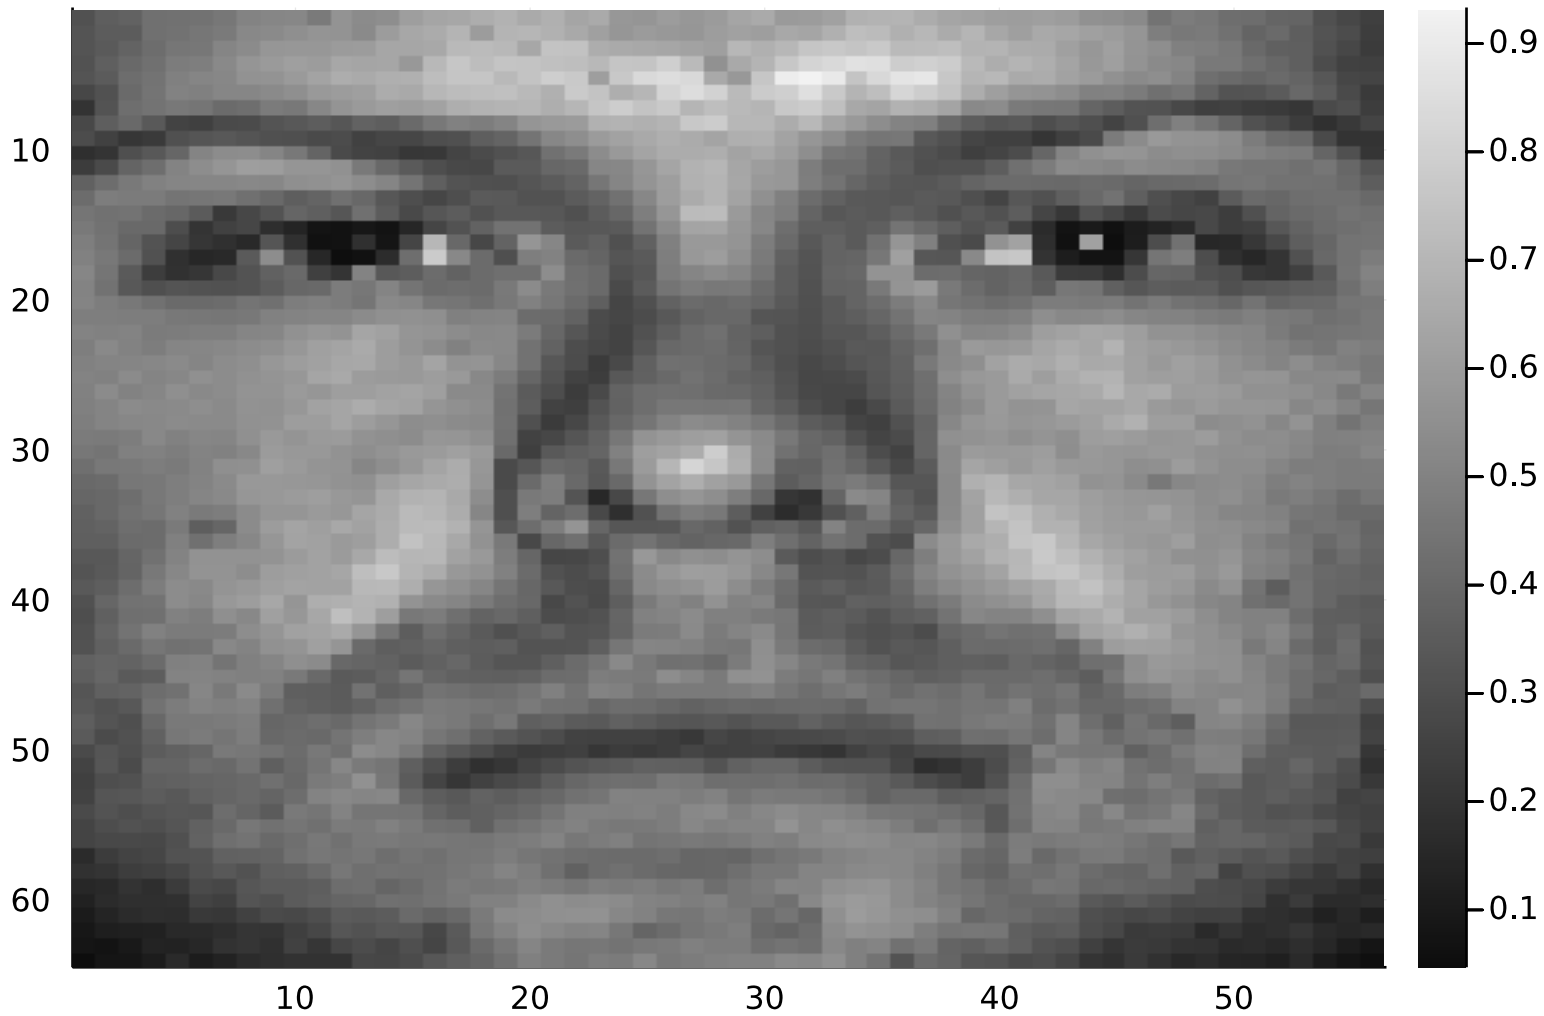

Supplement: supplementary_material [file attachment]

# HPCA Rank Knowledge (v known, zero init.)

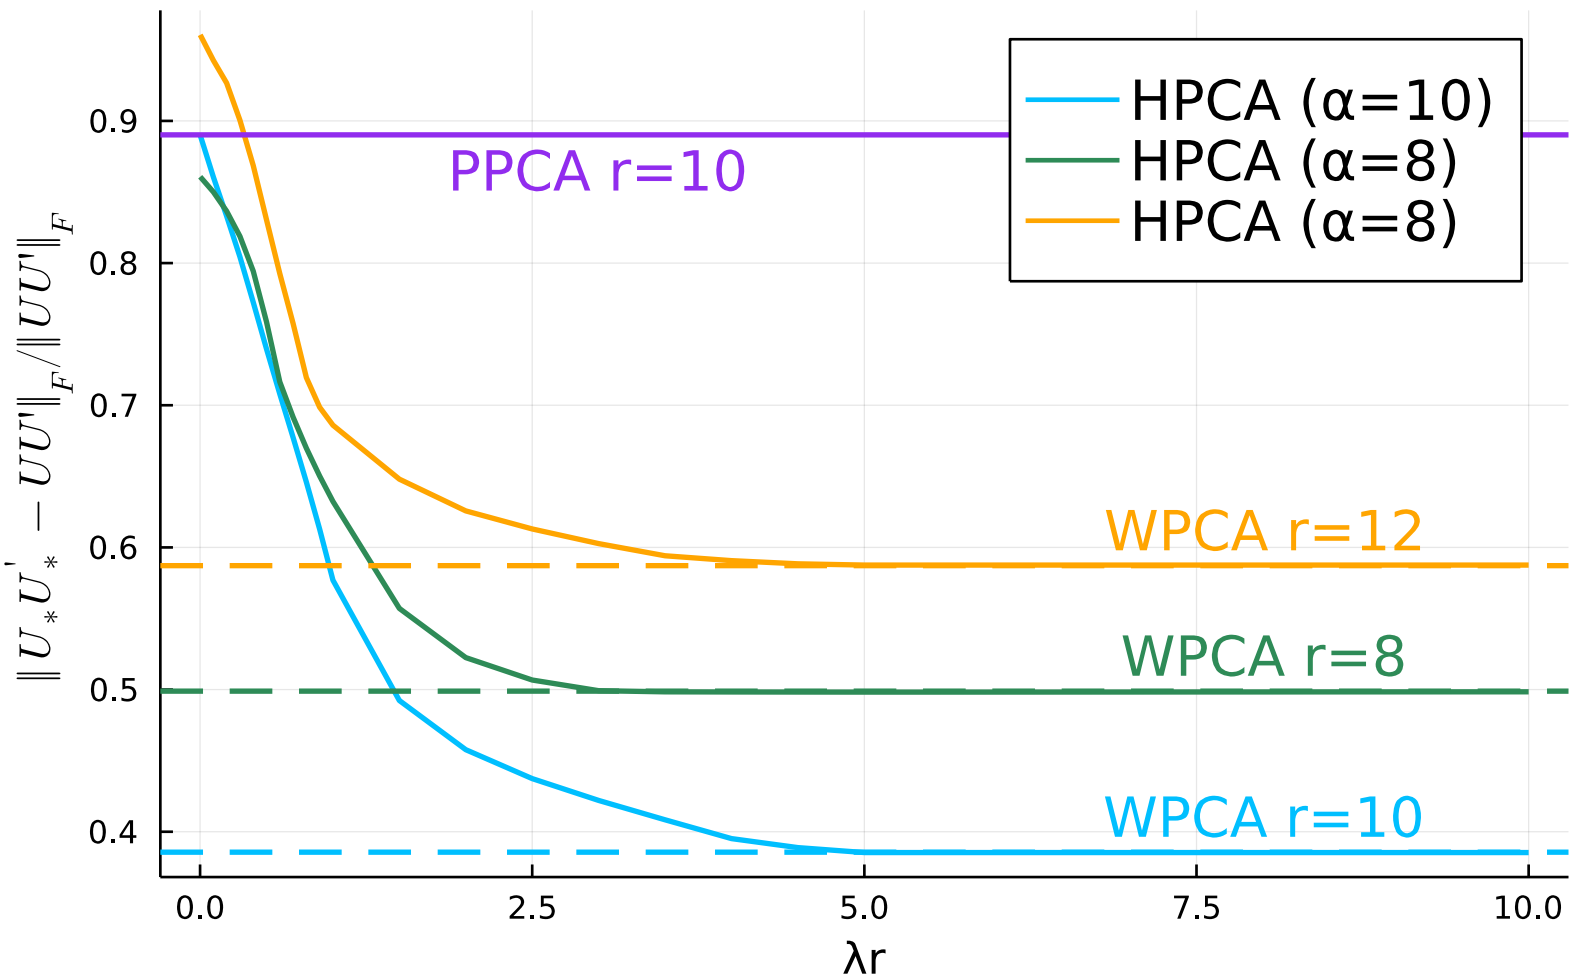

Supplement: supplementary_material [file attachment]

10 trials, gaussian data,  $v$  unknown no groups

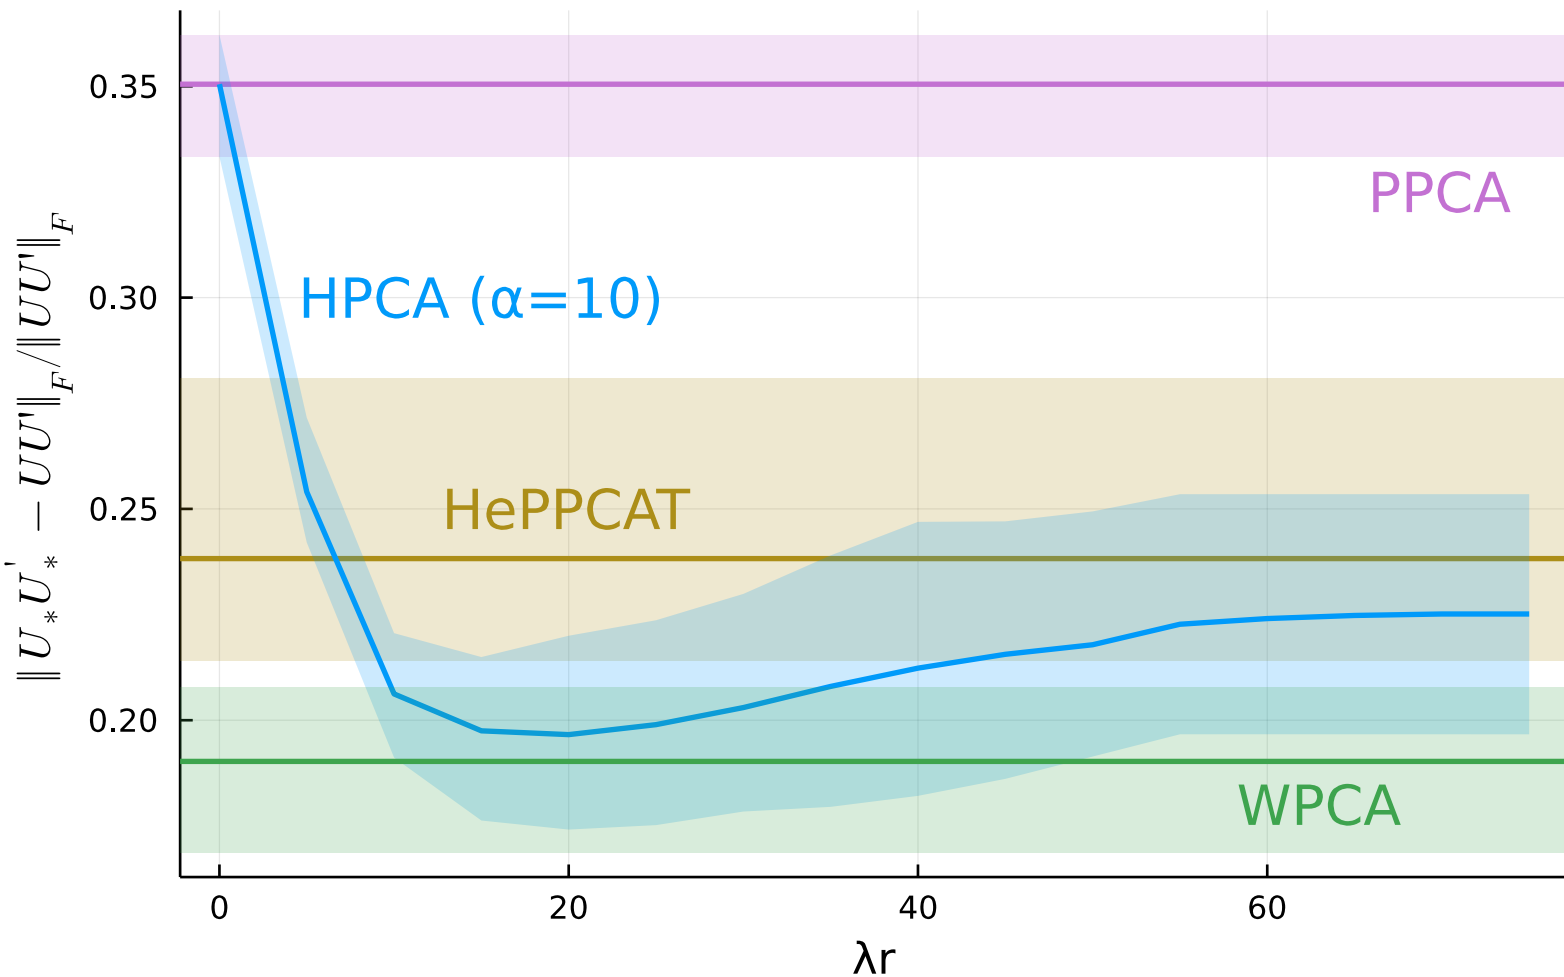

Supplement: supplementary_material [file attachment]

Variance Ratio  $v_2/v_1$ ,  $v_1=1$

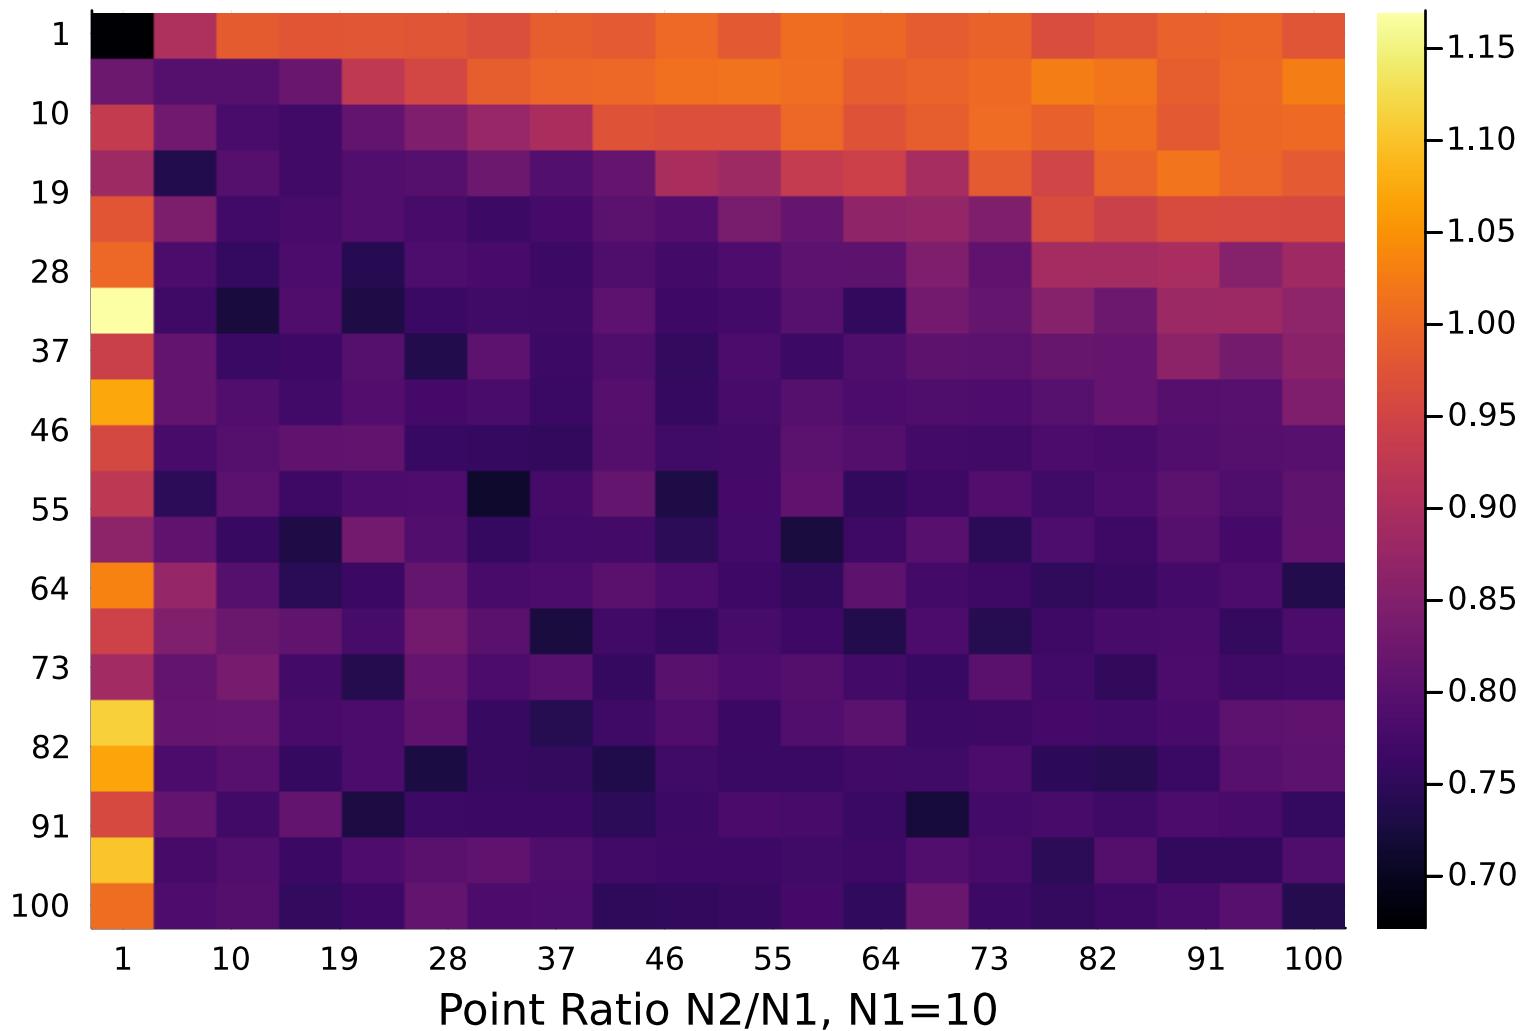

Supplement: supplementary_material [file attachment]
